# Supplementary material
Source: publisher figshare collection journal article supplement (https://aacr.figshare.com/ndownloader/files/40003967)
Supplement: Supplementary file 1 [file 40003967]

## Sheet: Drug screening data
	Supplementary Table S1. The full drug screen results (ranked by AUC difference)
NCGC ID	Samle Name	Primary MOA	Development Phase	NSD2 WT Cell Line_AUC	NSD2 Mutant Cell Line_AUC	AUC Difference (Mutant - WT)
NCGC00018238-09	Oxibendazole	DNA Polymerase Inhibitor	Phase III	-90.6526	-286.38	-195.728
NCGC00166288-02	3,3'-Diethylthiacarbocyanine iodide			-145.736	-289.188	-143.452
NCGC00092361-06	Prostaglandin E2	prostaglandin	Approved	-71.2644	-209.445	-138.18
NCGC00380482-01		<MOA Unknown> | Class: Terpenoid | Genus: N/A | Family: N/A | Species: N/A		-160.881	-284.458	-123.577
NCGC00159416-04	Nandrolone	Androgen Receptor Agonist		-1.26487	-108.387	-107.122
NCGC00025234-17	Alprostadil	prostaglandin	Approved	-66.292	-170.319	-104.027
NCGC00253603-01	Mibolerone	Progesterone receptor Agonist		-18.453	-112.913	-94.4596
NCGC00164632-02	Tibolone	Steryl-sulfatase Inhibitor	Approved	-34.8932	-125.952	-91.0587
NCGC00263236-02	SM-164	IAP Inhibitor	Preclinical	-0.312225	-88.1486	-87.8364
NCGC00346475-02	Birinapant	IAP Inhibitor	Phase II	-17.2866	-102.517	-85.2307
MLS002694957-02				-7.60518	-83.5325	-75.9273
NCGC00499577-01	JAK3i	Jak3	Biological Testing	-51.806	-126.636	-74.8302
NCGC00181788-01	Cefetamet pivoxil HCl			0.382346	-73.7425	-74.1248
NCGC00018275-05	Ornidazole			25.9734	-44.4688	-70.4422
NCGC00378909-01	BMS-564929	Androgen Receptor Agonist		12.6461	-57.5775	-70.2237
NCGC00274069-01	Nandrolone phenpropionate	Steroid hormone		-2.90919	-71.171	-68.2618
NCGC00177971-03	Forskolin			-51.843	-119.284	-67.4405
NCGC00263565-01	Gestodene	Progestogen hormone	Phase II	-13.0994	-79.0008	-65.9014
NCGC00508876-01	CCT-244747	Chk1 Inhibitor	Preclinical	-177.208	-242.482	-65.2743
NCGC00384587-01		<MOA Unknown> | Class: Saponin | Genus: N/A | Family: N/A | Species: N/A		-19.6869	-83.8943	-64.2074
NCGC00492296-02	eFT508	MNK1/2 Inhibitor		-24.0961	-88.0529	-63.9568
NCGC00242597-01	Saxagliptin	DPP-IV Inhibitor	Approved	17.6964	-45.814	-63.5104
NCGC00485410-01	Lubiprostone	Prostanoid EP4 receptor Agonist	Approved	4.62935	-58.3853	-63.0147
NCGC00016853-06	Nabumetone	Cyclooxygenase-2 Inhibitor		6.08919	-55.999	-62.0882
NCGC00484057-01	Methenolone (acetate)			-16.214	-77.5687	-61.3546
NCGC00183105-01	Lubiprostone	ClC-2 Channel Activator	Approved	-0.069939	-60.9659	-60.896
NCGC00181111-05	Tamibarotene	Retinoid RAR Agonist	Approved	-14.7757	-73.212	-58.4363
NCGC00024503-03	Glycine			-59.3795	-117.712	-58.3328
NCGC00159516-02	Meloxicam	Cyclooxygenase-1/2 Inhibitor	Approved	-9.94588	-67.5821	-57.6362
NCGC00381041-01		<MOA Unknown> | Class: Saponin | Genus: anagallis | Family: Primulaceae | Species: monelli		-158.677	-216.163	-57.4869
NCGC00142623-05	Digitoxin	<MOA Unknown> | Class: N/A | Genus: N/A | Family: N/A | Species: N/A		-284.827	-342.031	-57.2035
NCGC00386277-03	GDC-0152	IAP Inhibitor	Phase I	-15.7293	-71.6378	-55.9085
NCGC00183844-04	Sitafloxacin hydrate	DNA Topoisomerase IV Inhibitor	Approved	-3.88577	-58.9957	-55.1099
NCGC00485029-01	Testosterone 3-(O-carboxymethyl)oxime			17.0525	-37.9338	-54.9863
NCGC00016296-07	Dicumarol	Vitamin k epoxide reductase complex subunit 1 isoform 1 Inhibitor		-12.4259	-66.9597	-54.5338
NCGC00247341-02	Premethadone			-101.305	-155.463	-54.1576
NCGC00262930-01	Fertirelin			17.0372	-36.7119	-53.7491
NCGC00249894-01	Fosphenytoin	Sodium channel protein type VIII alpha subunit Inhibitor		19.5316	-33.6154	-53.1471
NCGC00378636-03	BAY 87-2243	Hypoxia-inducible factor 1 alpha Inhibitor		-141.572	-194.145	-52.5726
NCGC00016611-10	Bufexamac	non-steroidal antiinflammatory	Approved	-86.9457	-138.182	-51.2364
NCGC00181794-01	Dimethyl(2-phenoxyethyl)-2-thenylammonium iodide	acetylcholine metabolic process Modulator		-34.3929	-85.573	-51.18
NCGC00346825-02	10074-G5	MYC Expression Inhibitor	Preclinical	-31.0179	-81.7525	-50.7346
NCGC00183270-01	Acifluorfen-sodium			8.00051	-42.5564	-50.5569
NCGC00385731-01		<MOA Unknown> | Class: Saponin | Genus: N/A | Family: N/A | Species: N/A		-47.3978	-97.6344	-50.2366
NCGC00346620-06	GSK-256066	Phosphodiesterase IIII (PDE4) Inhibitor	Phase II	-28.6886	-78.6416	-49.9529
NCGC00160648-02	Salinazid			-41.2365	-91.1554	-49.9189
NCGC00345833-01	SR-3677	ROCK II Inhibitor	Preclinical	-53.601	-103.418	-49.8174
NCGC00262931-01	Mozavaptan	Vasopressin V2 receptor Antagonist		-34.0366	-82.9933	-48.9567
NCGC00032387-14	TG-003	Clk1, Clk4 Inhibitor	Preclinical	-15.6999	-63.7246	-48.0246
NCGC00351482-09	Duvelisib	PI3Kd/g Inhibitor	Pre-registered	-176.405	-224.141	-47.7364
NCGC00015437-17	Fenofibrate	PPARalpha Agonist	Approved	6.46137	-40.8911	-47.3524
NCGC00386934-01				-1.78442	-48.9301	-47.1456
NCGC00262968-01	Almitrine dimethanesulfonate			-31.5316	-78.2785	-46.7469
NCGC00385757-01		<MOA Unknown> | Class: Terpenoid | Genus: N/A | Family: N/A | Species: N/A		11.0083	-35.4341	-46.4423
NCGC00387212-05	GSA-10	Smoothened homolog Agonist		-7.00262	-53.4139	-46.4113
NCGC00181290-01	Furazabol			-34.2585	-80.3834	-46.1248
NCGC00485971-01	Itraconazole metabolite Hydroxy Itraconazole	P-glycoprotein 1 Inhibitor		-37.1859	-82.7088	-45.5229
NCGC00485476-01	RAD140	Androgen Receptor Modulator		-4.71866	-50.131	-45.4123
NCGC00159508-05	Rose Bengal disodium	Free Radical Stimulator	Phase III	-83.519	-128.715	-45.1964
NCGC00385281-01		<MOA Unknown> | Class: Terpenoid | Genus: N/A | Family: N/A | Species: N/A		-16.9515	-61.924	-44.9725
NCGC00384598-01		<MOA Unknown> | Class: Terpenoid | Genus: N/A | Family: N/A | Species: N/A		-115.723	-160.306	-44.5832
NCGC00142623-04	Digitoxin			-291.923	-335.686	-43.7629
NCGC00385745-01		<MOA Unknown> | Class: Saponin | Genus: N/A | Family: N/A | Species: N/A		-154.53	-198.262	-43.7319
NCGC00381335-01		<MOA Unknown> | Class: Saponin | Genus: N/A | Family: N/A | Species: N/A		-47.798	-91.0814	-43.2834
NCGC00263567-01	Cetirizine dihydrochloride	Histamine H1 Receptor Antagonists		12.4445	-30.6014	-43.046
NCGC00249919-01	Nandrolone furylpropionate			-28.3732	-70.9427	-42.5696
NCGC00169592-02		<MOA Unknown> | Class: Triterpen | Genus: Callistemon | Family: Myrtaceae | Species: lanceolatus		-15.7013	-58.2605	-42.5592
NCGC00263540-01	Asenapine	Dopamine D1/D2 Antagonist		1.79632	-40.7492	-42.5455
NCGC00016418-23	Methoxsalen	Cytochrome P450 CYP1A2 Inhibitor	Approved	9.03869	-33.0519	-42.0906
NCGC00344550-03	Stanozolol	Synthetic Steroid	Approved	-62.4204	-104.362	-41.9413
NCGC00384656-01		NCI-H460 Inhibitor		-291.312	-333.25	-41.9379
NCGC00159441-03	Deslanoside	Sodium/potassium-transporting ATPase Inhibitor		-237.522	-279.45	-41.9284
NCGC00160378-02	Pranolium chloride			-69.3302	-111.056	-41.7256
NCGC00186006-10	Nefiracetam	GABAergic Transmission Enhancer	Phase II	9.63746	-32.078	-41.7155
NCGC00159356-02	Nandrolone phenylpropionate	Steroid hormone	Clinical	7.87016	-33.841	-41.7112
NCGC00385645-01		<MOA Unknown> | Class: Terpenoid | Genus: N/A | Family: N/A | Species: N/A		-134.031	-175.677	-41.6454
NCGC00169844-02		<MOA Unknown> | Class: N/A | Genus: N/A | Family: N/A | Species: N/A		-87.943	-129.532	-41.5887
NCGC00263227-02	BAY-41-8543	Soluble Guanylate Cyclase (sGC) Activator	Phase I	12.6289	-28.7116	-41.3405
NCGC00380718-01		<MOA Unknown> | Class: Terpenoid | Genus: N/A | Family: N/A | Species: N/A		-99.889	-141.148	-41.2588
NCGC00385608-01		<MOA Unknown> | Class: Terpenoid | Genus: N/A | Family: N/A | Species: N/A		-123.652	-164.828	-41.176
NCGC00485918-01	Gamabufotalin	Vascular endothelial growth factor receptor 2 Inhibitor		-281.755	-322.873	-41.1173
NCGC00178734-10	Sitagliptin	DPP-IV Inhibitor	Approved	4.00173	-36.1485	-40.1503
NCGC00182868-16	Daporinad	NAMPT Inhibitor	Phase III	-379.574	-419.719	-40.1452
NCGC00384532-01		<MOA Unknown> | Class: Terpenoid | Genus: N/A | Family: N/A | Species: N/A		1.23712	-38.6301	-39.8672
NCGC00387247-04	IWP-4	Wnt signaling pathway Inhibitor		-0.317643	-40.0818	-39.7642
NCGC00181755-01	Delapril hydrochloride			4.20442	-35.536	-39.7404
NCGC00016916-11	Norfloxacin	DNA Topoisomerase IV Inhibitor	Approved	-13.2662	-52.7481	-39.4819
NCGC00380126-01		<MOA Unknown> | Class: Saponin | Genus: Beaumontia | Family: Apocynaceae | Species: grandiflora		-2.00862	-41.1733	-39.1647
NCGC00253751-01	Dimenoxadol	Opioid receptors; mu/kappa/delta Agonist		4.55526	-34.5837	-39.1389
NCGC00016016-18	Triamterene	Heart phosphodiesterase Inhibitor		-57.0197	-96.1382	-39.1185
NCGC00274067-09	Eltrombopag olamine	Thrombopoietin Receptor (TpoR) Agonist	Approved	-14.9913	-54.0741	-39.0828
NCGC00346551-05	Pomalidomide	TNF-alpha Production Inhibitor	Approved	-97.7032	-136.688	-38.9852
NCGC00016564-06	Metformin	AMPK Activator	Approved	0.673479	-37.5005	-38.174
NCGC00160397-13	Irsogladine maleate	M1 Muscarinic acetylcholine receptor Antagonist	Approved	14.08	-24.0287	-38.1087
NCGC00025100-17	LFM-A13	BTK Inhibitor	Phase I	-0.85744	-38.934	-38.0766
NCGC00510491-01	Elafibranor	PPARalpha Agonist	Phase III	-54.1705	-92.1208	-37.9503
NCGC00180686-03		<MOA Unknown> | Class: Steroid | Genus: Acocanthera | Family: Apocynaceae | Species: schimperii		-206.197	-243.926	-37.7292
NCGC00263581-01	Oxymetholone	Androgen Receptor Agonist		-39.4125	-76.621	-37.2084
NCGC00385201-01		<MOA Unknown> | Class: Saponin | Genus: N/A | Family: N/A | Species: N/A		-7.82268	-45.0285	-37.2058
NCGC00385794-01		<MOA Unknown> | Class: N/A | Genus: N/A | Family: N/A | Species: N/A		-272.681	-309.695	-37.0144
NCGC00385369-01		Sodium/potassium-transporting ATPase Blocker		-185.845	-222.835	-36.9897
NCGC00385359-01		<MOA Unknown> | Class: Steroid | Genus: Nerium | Family: Apocynaceae | Species: oleander		-307.186	-344.039	-36.8527
NCGC00485220-01	Strophanthidin			-175.391	-212.151	-36.76
NCGC00080392-05	Phosmet	Acetylcholinesterase Inhibitor		-15.7703	-52.373	-36.6027
NCGC00253596-01	Ethchlorvynol	GABA-A receptor; anion channel Positive Allosteric Modulator		9.80517	-26.6617	-36.4669
NCGC00241114-02	CPI-1189	p38 MAPK Inhibitor	Discontinued	-55.1466	-91.5316	-36.385
NCGC00263199-04	AMG-Tie2-1	Tie-2 kinase Inhibitor	Biological Testing	-45.0698	-81.3373	-36.2675
NCGC00346671-06	Anacetrapib	Cholesteryl Ester Transfer Protein (CETP) Inhibitor	Discontinued	14.1121	-22.008	-36.1201
NCGC00159563-02	BIBU 1361 dihydrochloride			-83.3274	-119.446	-36.1189
NCGC00169784-02		<MOA Unknown> | Class: Diterpen | Genus: Aspilia | Family: Compositae | Species: mossambicensis		-55.5362	-91.6204	-36.0843
NCGC00385970-01		<MOA Unknown> | Class: Saponin | Genus: N/A | Family: N/A | Species: N/A		-74.5996	-110.623	-36.0233
NCGC00015501-09	Apresoline	Smooth Muscle Relaxant	Approved	8.51978	-27.4293	-35.949
NCGC00346584-02	Asiatic acid	Nitric Oxide Production Inhibitor	Preclinical	8.5165	-27.3884	-35.9049
MLS002703591-02				-14.0343	-49.6542	-35.6199
NCGC00384618-01		<MOA Unknown> | Class: Steroide | Genus: N/A | Family: N/A | Species: N/A		-155.075	-190.391	-35.3163
NCGC00179665-04	Danazol	Androgen Receptor Agonist		3.60016	-31.4838	-35.0839
NCGC00168928-02		<MOA Unknown> | Class: aromatic polyketide | Genus: Anacardium | Family: Anacardiaceae | Species: occidentale		-18.8174	-53.7728	-34.9554
NCGC00485891-01	Norgestimate metabolite Norelgestromin	Progesterone receptor Agonist		-2.05011	-36.939	-34.8889
NCGC00249897-01	Nitromersol			-228.968	-263.396	-34.4279
NCGC00167520-05	Cilomilast	Phosphodiesterase IIII (PDE4) Inhibitor	Discontinued	0.379602	-33.8509	-34.2305
NCGC00274030-16	Infigratinib	FGFR3 Inhibitor	Phase II	2.12418	-32.0533	-34.1775
NCGC00344549-05	Oxandrolone	Synthetic Steroid	Approved	-37.6026	-71.6816	-34.079
NCGC00356746-04	GNE-618	NAMPT Inhibitor	Preclinical	-297.37	-331.408	-34.038
NCGC00183096-01	Cefcapene pivoxil hydrochloride	Penicillin-binding protein Inhibitor		-10.0788	-43.8027	-33.7239
NCGC00507838-01	Naquotinib mesylate	EGFR (Thr790Met Mutant) Inhibitor	Discontinued	-150.72	-184.438	-33.7178
NCGC00179496-04	Nifuroxazide			-52.8708	-85.9753	-33.1045
NCGC00263107-03	GB-83	PAR2 Antagonist	Biological Testing	-58.7476	-91.8058	-33.0582
NCGC00179802-02		<MOA Unknown> | Class: Steroid | Genus: Tephrosia | Family: Fabaceae | Species: nana		-157.738	-190.794	-33.0566
NCGC00389519-01	Golgicide A	Golgi-specific brefeldin A-resistance guanine nucleotide exchange factor 1 Inhibitor		-32.796	-65.8304	-33.0344
NCGC00185767-01	Spiramycin II	Bacterial 70S ribosome Binding Agent		-14.371	-47.3845	-33.0134
NCGC00159415-04	Methandrostenolone	Androgen Receptor Agonist		-8.14247	-41.139	-32.9965
NCGC00095023-08	Ethisterone	Progestogen hormone	Not determined	16.7746	-16.0899	-32.8645
NCGC00169476-02		<MOA Unknown> | Class: Terpenoid | Genus: N/A | Family: N/A | Species: N/A		-33.6288	-66.4899	-32.8611
NCGC00370728-03	EHop 016			-76.2053	-109.043	-32.8374
NCGC00345782-02	GMX-1778	IKK beta Inhibitor	Phase I	-344.369	-377.012	-32.6422
NCGC00166141-06	Carbinoxamine maleate	Histamine H1 receptor Antagonist		-20.6942	-53.22	-32.5258
NCGC00385343-01		<MOA Unknown> | Class: Terpenoid | Genus: N/A | Family: N/A | Species: N/A		-125.942	-158.277	-32.3352
NCGC00253708-01	1-(4-Fluorophenyl)-4-oxocyclohexanecarbonitrile			7.53591	-24.78	-32.3159
NCGC00387419-01	KP372-1			-225.741	-258.039	-32.2983
NCGC00480913-04	Altiratinib	HGFR Inhibitor	Phase I	-114.042	-146.107	-32.0643
NCGC00254844-01	5,7-Dimethoxy-2H-chromen-2-one			-11.9925	-43.9832	-31.9907
NCGC00263172-09	DCC-2036	Bcr-Abl Inhibitor	Phase I/II	-65.0626	-97.0246	-31.962
NCGC00183828-01	Phenoxypropazine			6.126	-25.746	-31.872
NCGC00018122-11	Tomelukast			-1.04879	-32.8365	-31.7877
NCGC00181000-02	Suplatast tosylate	Mediator Release Inhibitor	Approved	16.5694	-15.1547	-31.7241
NCGC00381292-01		<MOA Unknown> | Class: Steroid | Genus: Thevetia | Family: Apocynaceae | Species: plumeriaefolia		-106.34	-137.938	-31.5989
NCGC00180829-02		Na+/K+-ATPase Inhibitors		-203.137	-234.709	-31.5711
NCGC00346894-04	Valspodar	P-Glycoprotein (MDR-1; ABCB1) Inhibitor	Phase III	20.5498	-10.9497	-31.4995
NCGC00511352-01	BVT-14225	11-beta-Hydroxysteroid Dehydrogenase Type 1 (11beta-HSD1) Inhibitor	Preclinical	6.40881	-24.973	-31.3818
NCGC00385357-01		<MOA Unknown> | Class: Saponin | Genus: Anagallis | Family: Primulaceae | Species: monelli		-111.138	-142.435	-31.2977
NCGC00381053-01		<MOA Unknown> | Class: Shikimi | Genus: Schima | Family: Ternstroemiaceae | Species: wallichii		-13.8462	-45.1001	-31.2539
NCGC00507842-01	BMS-582949	p38 MAPK Inhibitor	Phase II	-1.4173	-32.6131	-31.1959
NCGC00381199-01		<MOA Unknown> | Class: N/A | Genus: N/A | Family: N/A | Species: N/A		-31.5499	-62.6299	-31.08
NCGC00165856-03	Orlistat	Fatty acid synthase inhibitor	Approved	-12.5671	-43.6249	-31.0578
NCGC00159570-14	RITA	MDM2 (hdm2) Inhibitor	Preclinical	-156.316	-187.338	-31.0217
NCGC00507851-01	OTS-514	PBK Inhibitor	Preclinical	-307.607	-338.593	-30.9864
NCGC00016257-10	4-Dimethylaminoantipyrine			5.8202	-25.1165	-30.9367
NCGC00386040-01		<MOA Unknown> | Class: Saponin | Genus: Anagallis | Family: Primulaceae | Species: monelli		-113.342	-144.144	-30.8021
NCGC00386019-01		<MOA Unknown> | Class: Saponin | Genus: N/A | Family: N/A | Species: N/A		-111.687	-142.474	-30.7865
NCGC00095122-04	IRBESARTAN			34.8673	4.42929	-30.438
NCGC00093828-12	PD-169316	p38 MAPK Inhibitor	Biological Testing	-1.96103	-32.3044	-30.3434
NCGC00371028-01	EC 23	Retinoic acid receptor gamma Agonist		-60.1326	-90.4287	-30.2961
NCGC00357426-01				-30.5555	-60.8389	-30.2834
NCGC00091009-07	17-Methyltestosterone	Aromatase Inhibitor		-25.9568	-56.229	-30.2722
NCGC00183103-01	Tocophersolan			-30.1975	-60.3776	-30.18
NCGC00016959-06	Ciprofloxacin	DNA Topoisomerase IV Inhibitor	Approved	10.7289	-19.419	-30.1479
NCGC00408913-01	MK-2866	Androgen Receptor Modulator		-9.06468	-39.1442	-30.0795
NCGC00164367-10	Paclitaxel	Tubulin depolymerization inhibitor	Approved	-340.785	-370.856	-30.0717
NCGC00345812-03	Ingenol mebutate	PKC Activator	Approved	-94.752	-124.66	-29.9079
NCGC00347645-02		<MOA Unknown> | Class: Polyketide | Genus: - | Family: - | Species: -		-121.889	-151.566	-29.6768
NCGC00166043-02	Flamenol			11.8307	-17.8083	-29.639
NCGC00511348-01	ML226	ABHD11 Inhibitor	Biological Testing	-17.5731	-47.1726	-29.5995
NCGC00381294-01		<MOA Unknown> | Class: Terpenoid | Genus: Eutada | Family: Mimosaceae | Species: africana		-108.073	-137.663	-29.5901
NCGC00351483-01	XL-388	mTORC1/2 Inhibitor	IND Filed	-102.888	-132.351	-29.4629
NCGC00385325-01		<MOA Unknown> | Class: Steroide | Genus: N/A | Family: N/A | Species: N/A		-233.02	-262.403	-29.3837
NCGC00164480-02	Mecloralurea			-16.137	-45.5085	-29.3715
NCGC00415015-01				22.1088	-7.26103	-29.3698
NCGC00371443-03	KDM5-C70	KDM5A/KDM5B Inhibitor	Biological Testing	16.7996	-12.5015	-29.301
NCGC00159349-05	Levonorgestrel	Progestogen hormone	Approved	13.2412	-15.9191	-29.1603
NCGC00188346-02	PP242	mTOR Inhibitor		-253.511	-282.557	-29.046
NCGC00263652-01	Pinacidil monohydrate			12.2147	-16.6375	-28.8523
NCGC00015562-25	Indomethacin	Prostaglandin G/H Synthase 2 (PTGS2; COX-2) Inhibitor	Approved	-23.424	-52.26	-28.836
NCGC00262921-01	(4S,6s)-5,6-dihydro-6-methyl-4h-thieno[2,3-b]thiopyran-4-ol 7,7-dioxide			6.86805	-21.9636	-28.8316
NCGC00378698-01	HhAntag	Smoothened homolog Antagonist		-8.34713	-37.1695	-28.8224
NCGC00385528-01		<MOA Unknown> | Class: Steroid | Genus: Tephrosia | Family: Fabaceae | Species: nana		-161.924	-190.689	-28.7645
NCGC00386110-01		<MOA Unknown> | Class: N/A | Genus: N/A | Family: N/A | Species: N/A		-45.306	-74.0235	-28.7175
NCGC00095074-05	2,2'-Thiobisethanol			35.3874	6.75188	-28.6355
NCGC00485149-01	BW 245C	Prostanoid DP receptor Agonist		-90.5772	-119.151	-28.5735
NCGC00015718-12	Naftopidil	alpha1-Adrenoceptor Antagonist	Approved	-37.8371	-66.3636	-28.5265
NCGC00384482-01		Golgi-Specific Brefeldin A-Resistance Guanine Nucleotide Exchange Factor 1 (GBF1) Inhibitors		-181.593	-210.118	-28.5256
MLS000109973-02				-2.21967	-30.601	-28.3813
NCGC00390642-01	LY451395	Glutamate receptor ionotropic AMPA Positive Allosteric Modulator		-40.1081	-68.4565	-28.3484
NCGC00253645-01	6-Methoxy-2-naphthalaldehyde			3.41633	-24.784	-28.2003
NCGC00386816-01				-102.241	-130.428	-28.1875
NCGC00510078-03	SR-3029	CDK6 Inhibitor	Preclinical	-204.803	-232.948	-28.1445
NCGC00378890-01	CB30865	Nicotinamide phosphoribosyltransferase Inhibitor		-402.052	-430.064	-28.0123
NCGC00384705-01		<MOA Unknown> | Class: Terpenoid | Genus: N/A | Family: N/A | Species: N/A		-144.279	-172.268	-27.9887
NCGC00181297-01	Mebrofenin			37.1114	9.16769	-27.9437
NCGC00386008-01		<MOA Unknown> | Class: Steroid | Genus: N/A | Family: N/A | Species: N/A		-199.469	-227.378	-27.9092
NCGC00345808-01	BP-1-102	STAT-3 Inhibitor	Preclinical	-39.7623	-67.6361	-27.8737
NCGC00169509-02		Sodium/potassium-transporting ATPase Inhibitor		-249.321	-277.146	-27.8249
NCGC00378599-03	Encorafenib	Raf Kinase Inhibitor B (V600E Mutant)	Pre-registered	-120.383	-148.202	-27.8186
NCGC00346484-04	ZSTK-474	PI3K Inhibitor	Phase I/II	-203.327	-231.086	-27.7588
NCGC00183039-03	Nystatin	Antifungal Agent	Approved	-14.7245	-42.404	-27.6795
NCGC00091073-07	Diazinon			25.3836	-2.25301	-27.6366
NCGC00389612-01	AZD4547	FGFR 3 Inhibitor		-70.6748	-98.2762	-27.6014
NCGC00390682-01	Tolfenpyrad	Haemonchus contortus Inhibitor		-135.09	-162.599	-27.5095
NCGC00263460-01	Amprolium hydrochloride	Eimeria tenella Inhibitor		-22.4001	-49.9055	-27.5054
NCGC00262943-01	Tocanfil			16.7375	-10.7079	-27.4454
NCGC00249050-02	Exifone			-56.1852	-83.5611	-27.3759
NCGC00384513-01		Sodium/potassium-transporting ATPase Inhibitor		-136.558	-163.825	-27.2679
NCGC00485914-01	GLPG0492	Androgen Receptor Modulator		-17.1504	-44.3692	-27.2189
NCGC00384782-01		<MOA Unknown> | Class: Saponin | Genus: N/A | Family: N/A | Species: N/A		-20.5456	-47.7182	-27.1726
NCGC00380238-01		<MOA Unknown> | Class: sesterterpene | Genus: N/A | Family: N/A | Species: N/A		-18.2301	-45.3781	-27.148
NCGC00346879-04	PNU-74654	Wnt Signaling Inhibitor	Biological Testing	5.30651	-21.8092	-27.1157
NCGC00389334-01	Posaconazole	Lanosterol 14alpha-demethylase Inhibitors	Approved	-68.6505	-95.7272	-27.0767
NCGC00015196-09	Cirazoline			-34.1271	-61.1424	-27.0153
NCGC00485075-01	Cyclazosin hydrochloride	Alpha-1d adrenergic receptor Antagonist		-122.438	-149.342	-26.9033
NCGC00505020-01	Indimitecan hydrochloride (LMP-776)	DNA Topoisomerase I Inhibitor	Phase I	-340.133	-367.033	-26.9001
NCGC00016023-18	Theobromine	Phosphodiesterase Inhibitor	Approved	-11.964	-38.85	-26.8859
NCGC00015762-13	Oxolinic acid			15.8952	-10.9887	-26.8839
NCGC00485429-01	PE 154	Butyrylcholinesterase Inhibitor		-79.8644	-106.651	-26.7865
NCGC00351602-09	AP-26113	ALK Inhibitor	Biological Testing	-104.156	-130.923	-26.7673
NCGC00263565-06	Gestodene	Progestogen hormone	Phase II	-0.808359	-27.535	-26.7267
NCGC00164582-02	Feprazone			-43.9164	-70.6279	-26.7116
NCGC00385312-01		<MOA Unknown> | Class: Saponin | Genus: Anagallis | Family: Primulaceae | Species: monelli		-128.262	-154.886	-26.6232
NCGC00485936-01	AZD4547			-104.701	-131.25	-26.5488
NCGC00475728-01	AZD-8186	PI3Ka/b/d Inhibitor	Phase I	-143.302	-169.843	-26.5411
NCGC00384920-01		<MOA Unknown> | Class: Steroid | Genus: N/A | Family: N/A | Species: N/A		-205.226	-231.76	-26.5346
NCGC00351607-02	GZD-824	Bcr-Abl Inhibitor	Preclinical	-236.42	-262.953	-26.5331
MLS000107414-02				-26.3425	-52.7726	-26.4301
NCGC00015110-09	Aminoglutethimide	Aromatase Inhibitor	Withdrawn	36.374	10.0008	-26.3732
NCGC00263544-04	Dexrazoxane hydrochloride	DNA Topoisomerase II Inhibitor	Approved	-73.764	-100.118	-26.3537
NCGC00381404-01		<MOA Unknown> | Class: Terpenoid | Genus: N/A | Family: N/A | Species: N/A		-23.1268	-49.4762	-26.3494
NCGC00159378-04	Phenylhydrazine hydrochloride			-21.5574	-47.8581	-26.3007
NCGC00507854-01	MI-503	Histone methyl transferase Inhibitor	Preclinical	-79.8621	-106.123	-26.2611
NCGC00378815-01	TNP	Inositol-trisphosphate 3-kinase A Inhibitor		-0.329501	-26.5083	-26.1788
NCGC00480786-02	Brequinar	DHODH Inhibitor	Phase II	-192.332	-218.504	-26.1724
NCGC00381297-01		<MOA Unknown> | Class: Terpenoid | Genus: N/A | Family: N/A | Species: N/A		-93.8425	-120.009	-26.1665
NCGC00521067-01	BMS-587101	ICAM-1 Inhibitor	Phase II	-4.15229	-30.2807	-26.1284
NCGC00263097-09	Cediranib	VEGFR-1/2/3 Inhibitor	Phase III	-82.9054	-108.899	-25.9937
NCGC00166249-03	Erythrosin B			-20.6075	-46.5903	-25.9828
NCGC00509941-01	PF-06747775	EGFR (Thr790Met Mutant) Inhibitor	Phase I/II	-50.2893	-76.1898	-25.9005
NCGC00263617-13	M-344	HDAC Inhibitor	Preclinical	-161.585	-187.407	-25.822
NCGC00015204-09	Carmustine	DNA Alkylating Agent	Approved	11.2927	-14.5287	-25.8214
NCGC00013058-02	Malachite green oxalate			-219.895	-245.624	-25.7298
NCGC00166213-02	2-Octyl-1-dodecanol			3.83838	-21.862	-25.7004
NCGC00385189-01		<MOA Unknown> | Class: Steroid | Genus: Nerium | Family: Apocynaceae | Species: oleander		-176.46	-202.139	-25.6794
NCGC00250405-15	AZD-8055	mTORC1/2 Inhibitor	Phase I	-252.205	-277.883	-25.6781
NCGC00013130-04	Aminoquinuride dihydrochloride			-13.56	-39.2141	-25.6541
NCGC00168804-02		<MOA Unknown> | Class: Shikimi | Genus: Juniperus | Family: Cupressaceae | Species: communis		-30.2843	-55.9288	-25.6445
NCGC00263194-02	SB-216763	GSK-3 Inhibitor	Preclinical	12.8101	-12.8342	-25.6444
NCGC00167441-07	Pramipexole hydrochloride	Dopamine D3 Antagonist	Approved	4.87213	-20.6064	-25.4786
NCGC00379157-02	ML133 HCl	Inward rectifier potassium channel 2 Inhibitor		15.15	-10.3106	-25.4606
NCGC00159522-05	Cephalexin	Cephalosporin antibiotic		22.699	-2.7268	-25.4258
NCGC00510444-01	Epiblastin A	CK1 Inhibitor	Biological Testing	-95.5525	-120.972	-25.4191
NCGC00169815-02		Phosphodiesterase 1 Inhibitor		-7.7208	-33.1348	-25.414
NCGC00025288-07	Deguelin	PI3K Inhibitor	Preclinical	-65.2937	-90.6421	-25.3484
NCGC00345829-03	PD-173955	cSRC Inhibitor	Biological Testing	-79.3342	-104.642	-25.3081
NCGC00385728-01		<MOA Unknown> | Class: Tannin | Genus: N/A | Family: N/A | Species: N/A		13.539	-11.7337	-25.2727
NCGC00346952-01	Cdk4/6 Inhibitor IV	CDK4/6 Inhibitor	Biological Testing	-111.352	-136.604	-25.2525
NCGC00249885-01	Estradiol acetate			-47.4416	-72.6935	-25.2519
NCGC00373238-02	Natamycin	Antifungal Agent	Approved	-0.860029	-26.094	-25.234
NCGC00160392-03	LOMOFUGIN			-50.5305	-75.7168	-25.1863
NCGC00015823-23	Piroxicam	Cyclooxygenase Inhibitor	Approved	-178.481	-203.627	-25.1459
NCGC00263616-04	Tenovin-6	"NAD-dependent protein deacetylase sirtuin-3, mitochondrial Inhibitor"		-112.162	-137.306	-25.1444
NCGC00249918-01	Estriol tripropionate			-17.9141	-43.0249	-25.1108
NCGC00402368-01	AMG-511	PI3Kalpha Inhibitor	Preclinical	-269.081	-294.132	-25.0509
NCGC00384894-01		<MOA Unknown> | Class: Saponin | Genus: N/A | Family: N/A | Species: N/A		-47.4162	-72.4568	-25.0406
NCGC00013683-06	Chlorprothixene	Serotonin (5-HT) receptor Antagonist		-17.7643	-42.7645	-25.0002
NCGC00344522-01	Gluconolactone	Calcium Chelating Agent		10.6683	-14.1624	-24.8307
NCGC00165840-11	NU 7026			-17.6009	-42.4047	-24.8038
NCGC00182030-01	Sulbenicillin disodium			11.0123	-13.7819	-24.7942
NCGC00247697-01	N-Phenyl-N-[1-[2-(2-thienyl)ethyl]-4-piperidyl]propanamide hydrochloride (1:1)			-44.0743	-68.8568	-24.7825
NCGC00485977-01	Isoastragaloside I			23.3687	-1.39906	-24.7678
NCGC00485217-01	8-(3-Chlorostyryl)caffeine	Monoamine oxidase B Inhibitor		24.7313	0	-24.7313
NCGC00169107-02		<MOA Unknown> | Class: Iridoid | Genus: Buddleia | Family: Loginaceae | Species: polystachya		9.72577	-14.9981	-24.7239
NCGC00384614-01		<MOA Unknown> | Class: Polyketide | Genus: N/A | Family: N/A | Species: N/A		-44.6241	-69.3079	-24.6838
NCGC00385179-01		<MOA Unknown> | Class: Polyketide | Genus: N/A | Family: N/A | Species: N/A		-2.10735	-26.6748	-24.5675
NCGC00159424-04	Tetramethylthiuram monosulfide			-100.251	-124.81	-24.5594
NCGC00249938-01	Glymidine sodium			28.8385	4.33903	-24.4994
NCGC00485134-01	SBI-0087702	Cyclic AMP-dependent transcription factor ATF-2 Inhibitor		-26.2234	-50.7147	-24.4913
NCGC00242493-07	Quizartinib	Flt3 Inhibitor	Phase III	-44.0917	-68.5714	-24.4797
NCGC00381303-01		<MOA Unknown> | Class: Terpenoid | Genus: N/A | Family: N/A | Species: N/A		-102.607	-126.973	-24.3661
NCGC00346490-05	OSU-03012	Phosphoinositide Dependent Kinase Inhibitor	Phase I	-106.523	-130.854	-24.331
NCGC00263207-02	QS11	ADP-ribosylation factor GTPase activating protein 1 Inhibitor	Biological Testing	-10.672	-34.995	-24.3231
NCGC00017280-23	Tretinoin	Retinoid RORbeta Ligand	Approved	-48.605	-72.9186	-24.3136
NCGC00385321-01		<MOA Unknown> | Class: Saponin | Genus: N/A | Family: N/A | Species: N/A		-33.3463	-57.6456	-24.2993
NCGC00180693-03		<MOA Unknown> | Class: Triterpen | Genus: Achras | Family: Sapotaceae | Species: sapota		-120.766	-145.059	-24.2932
NCGC00015917-09	SB-206553	5-HT2B Receptor Antagonist	Preclinical	8.6669	-15.6152	-24.2821
NCGC00485913-01	GLPG0492 (R enantiomer)	Androgen Receptor Modulator		23.1462	-1.01327	-24.1595
NCGC00024994-12	Selegiline hydrochloride	MAO-B Inhibitor	Approved	-11.6113	-35.769	-24.1577
NCGC00164619-02	Anastrozole	Aromatase Inhibitor	Approved	-26.3522	-50.5088	-24.1566
NCGC00186464-04	Aliskiren hemifumarate	Renin Inhibitor	Approved	4.57403	-19.3672	-23.9412
NCGC00161419-05	Trimetrexate	Dihydrofolate Reductase (DHFR) Inhibitor	Phase II	-287.228	-311.165	-23.9375
NCGC00346537-04	LY-2228820	p38 MAPK Inhibitor	Phase I/II	-25.1085	-49.0407	-23.9321
NCGC00253632-01	Darusentan	Endothelin receptor ET-B Antagonist		-11.6119	-35.4506	-23.8386
NCGC00384808-01		<MOA Unknown> | Class: Terpenoid | Genus: N/A | Family: N/A | Species: N/A		-114.904	-138.656	-23.7515
NCGC00015947-08	Siguazodan			29.4365	5.7379	-23.6986
NCGC00507856-01	PD-1/PD-L1 Inhibitor 1	PD-1 /PD-L1 interaction Inhibitor	Biological Testing	-264.195	-287.738	-23.5435
NCGC00385538-01		<MOA Unknown> | Class: N/A | Genus: N/A | Family: N/A | Species: N/A		-25.9207	-49.4419	-23.5212
NCGC00380658-01		<MOA Unknown> | Class: Steroide | Genus: N/A | Family: N/A | Species: N/A		-95.4003	-118.906	-23.5062
NCGC00381285-01		<MOA Unknown> | Class: Saponin | Genus: N/A | Family: N/A | Species: N/A		-4.07855	-27.5776	-23.499
NCGC00480752-01	L-Dehydroascorbic acid			25.5052	2.03473	-23.4705
NCGC00016916-15	Norfloxacin	DNA Topoisomerase IV Inhibitor	Approved	-15.4997	-38.9564	-23.4567
NCGC00415059-02	AZD-3965	MCT2 Inhibitor	Phase I	13.5958	-9.85059	-23.4464
NCGC00386348-01	PD173955	Tyrosine-protein kinase SRC Inhibitor		-83.2546	-106.608	-23.3538
NCGC00262932-01	Oxyphenisatin	peristalsis Activator		-46.8339	-70.1717	-23.3379
NCGC00389194-01	Citalopram hydrobromide	5-HT Reuptake Inhibitor		-2.90592	-26.2395	-23.3336
NCGC00485960-01	Macitentan (n-butyl analogue)	Endothelin receptor ET-A Antagonist		24.5175	1.29438	-23.2231
NCGC00159349-15	Levonorgestrel	Progestogen hormone	Approved	0.253254	-22.8639	-23.1171
NCGC00507864-01	GDC-0084	PI3K Inhibitor	Phase II	-134.357	-157.432	-23.0749
NCGC00250400-05	Crizotinib	HGFR Inhibitor	Approved	-159.008	-182.078	-23.0708
NCGC00384908-01		<MOA Unknown> | Class: Terpenoid | Genus: Tinospora | Family: Menispermaceae | Species: cordifolia		-7.38189	-30.3098	-22.9279
NCGC00253679-01	4-Bromo-1-(bromomethyl)-2-fluoro-benzene			15.381	-7.49232	-22.8733
NCGC00485932-01	Bufotalin	PC-3 Inhibitor		-279.137	-301.941	-22.8035
NCGC00159391-03	Sulfobromophthalein	Solute carrier organic anion transporter family member 1B1 Substrate		7.70305	-15.0942	-22.7972
NCGC00385738-01		<MOA Unknown> | Class: Saponin | Genus: N/A | Family: N/A | Species: N/A		-11.0536	-33.8205	-22.7669
NCGC00263204-09	CYC-116	Aurora-A/B/C Kinase Inhibitor	Phase I	-163.408	-186.16	-22.7529
NCGC00345851-06	GNE-477	PI3K Inhibitor	Preclinical	-239.769	-262.519	-22.75
NCGC00241107-12	Bosutinib	Bcr-Abl Inhibitor	Approved	-135.53	-158.279	-22.7492
NCGC00371135-01	BMS303141	ATP-citrate synthase Inhibitor		-22.9624	-45.7	-22.7376
NCGC00380717-01		<MOA Unknown> | Class: Terpenoid | Genus: N/A | Family: N/A | Species: N/A		-129.328	-152.023	-22.6949
NCGC00169683-02		<MOA Unknown> | Class: steroid | Genus: Nerium | Family: Apocynaceae | Species: oleander		-112.649	-135.277	-22.6287
NCGC00169803-03		<MOA Unknown> | Class: Steroid | Genus: Nerium | Family: Apocynaceae | Species: oleander		-113.928	-136.534	-22.6062
NCGC00183017-01	Ethyl 4-nitrophenyl ethylphosphonate			2.28946	-20.3048	-22.5943
NCGC00253684-01	4-Phenylpiperidin-4-ol			8.1809	-14.4093	-22.5902
NCGC00178529-07	Levofloxacin	DNA Topoisomerase IV Inhibitor	Approved	11.2264	-11.3297	-22.5561
NCGC00263099-07	CP-466722	ATM Kinase Inhibitor	Preclinical	-36.6883	-59.1817	-22.4934
NCGC00253693-01	Isoxepac			30.6308	8.19215	-22.4386
NCGC00370903-02	PD 161570	Fibroblast growth factor receptor 1 Antagonist		-98.8759	-121.295	-22.4188
NCGC00091761-07	Butylated hydroxytoluene			-32.6894	-55.0725	-22.3832
NCGC00250397-04	NVP-XAV-939	TNKS1/TNKS2 Inhibitor	Preclinical	22.8756	0.510133	-22.3655
NCGC00242057-04	GW-768505A	Tie-2 kinase Inhibitor	Biological Testing	-61.1871	-83.5373	-22.3502
NCGC00345447-10	3-Methyladenine	PI3K Inhibitor	Biological Testing	13.9507	-8.3707	-22.3214
NCGC00378895-01	Cebranopadol	Nociceptin Receptor (OPRL1; KOR3; ORL1) Agonist	Phase III	-63.2665	-85.5864	-22.32
NCGC00384753-01		<MOA Unknown> | Class: Flavonoid | Genus: N/A | Family: N/A | Species: N/A		-15.1934	-37.3909	-22.1975
NCGC00498439-01	LY-3177833	CDK 7 Inhibitor	Preclinical	-36.4611	-58.6128	-22.1517
NCGC00380711-01		<MOA Unknown> | Class: Diterpen | Genus: Euphorbia | Family: Euphorbiaceae | Species: paralias		4.54529	-17.5987	-22.144
NCGC00169251-02		<MOA Unknown> | Class: Saponin | Genus: Succisa | Family: Dipsacaceae | Species: pratensis		-23.4266	-45.5574	-22.1308
NCGC00166114-03	Eosin			-5.78527	-27.9096	-22.1243
NCGC00017394-11	G-Strophanthin	Na+/K+-ATPase Inhibitor		-265.851	-287.912	-22.0609
NCGC00386907-01				10.7976	-11.2621	-22.0597
NCGC00421870-01	INCB-024360	"Indoleamine 2,3-dioxygenase Inhibitor"		-36.514	-58.5395	-22.0255
NCGC00387762-01	Glycogen phosphorylase inhibitor	Liver glycogen phosphorylase Inhibitor		22.6266	0.64436	-21.9822
NCGC00386714-01	Endoxifen	PKC inhibitor	Phase II	-104.047	-126.009	-21.9627
NCGC00387221-01	FTIDC	Metabotropic glutamate receptor 5 Antagonist		-21.9345	-43.8736	-21.9391
NCGC00381196-01		<MOA Unknown> | Class: Peptide | Genus: N/A | Family: N/A | Species: N/A		-59.8945	-81.8078	-21.9133
NCGC00182851-02	Meprednisone	Glucocorticoid steroid	Approved	-41.5379	-63.4388	-21.9009
NCGC00017259-07	Nicergoline	Alpha-1a adrenergic receptor Antagonist		-7.15232	-29.0386	-21.8863
NCGC00372956-01	Roniciclib	Jak2/3 Inhibitor	Phase II	-90.191	-112.075	-21.8839
NCGC00168848-03		<MOA Unknown> | Class: Steroid | Genus: Acocanthera | Family: Apocynaceae | Species: schimperii		-249.561	-271.438	-21.8771
NCGC00167532-02	Balofloxacin	Antibacterial	Phase III	29.1966	7.42098	-21.7756
NCGC00387473-03	Smad3Inhibitor,SIS3			-60.1282	-81.8751	-21.7469
NCGC00179676-03	Lynestrenol			-5.27415	-27.0121	-21.738
NCGC00385766-01		<MOA Unknown> | Class: Shikimi | Genus: Acacia | Family: Fabaceae | Species: nilotica		-17.6389	-39.3329	-21.694
NCGC00090752-04	Fenretinide	RARbeta/gamma Agonist	Phase II	-171.172	-192.848	-21.6761
NCGC00024196-05	Megestrol acetate	Progesterone Receptor Antagonist	Approved	8.64777	-12.9951	-21.6429
NCGC00177995-10	Sarafloxacin hydrochloride	Antibacterial	Approved	19.0107	-2.60658	-21.6173
NCGC00096056-02	Ethacridine lactate hydrate			-95.785	-117.397	-21.6117
NCGC00017280-37	Tretinoin	Retinoid RORbeta Ligand	Approved	-2.61042	-24.2101	-21.5996
NCGC00385326-01		<MOA Unknown> | Class: Saponin | Genus: N/A | Family: N/A | Species: N/A		-55.2187	-76.8148	-21.5961
NCGC00092291-03	SANT-1	Smoothened homolog Antagonist		9.12171	-12.4498	-21.5715
NCGC00484066-01	FIIN-2	Fibroblast growth factor receptor 4 Inhibitor		-152.584	-174.146	-21.5625
NCGC00385864-01		<MOA Unknown> | Class: Alkaloid | Genus: N/A | Family: N/A | Species: N/A		-33.418	-54.9436	-21.5256
NCGC00241097-06	Tandutinib	KIT Inhibitor	Discontinued	-28.583	-50.0469	-21.4639
NCGC00345796-09	GSK-2636771	PI3Kbeta Inhibitor	Phase I/II	-39.0511	-60.5037	-21.4526
NCGC00179944-04		<MOA Unknown> | Class: N/A | Genus: N/A | Family: N/A | Species: N/A		-4.77765	-26.2223	-21.4446
NCGC00178815-03	Tolmetin sodium dihydrate	Cyclooxygenase-2 Inhibitor		26.774	5.33301	-21.441
NCGC00385704-01		<MOA Unknown> | Class: Terpenoid | Genus: N/A | Family: N/A | Species: N/A		-192.778	-214.139	-21.3615
NCGC00488703-01				-15.2246	-36.5753	-21.3507
NCGC00092315-02	ZD 2079	Beta-3 adrenergic receptor Agonist		7.04601	-14.2993	-21.3453
NCGC00346582-03	Mubritinib	HER2 Inhibitor	Discontinued	-83.0862	-104.392	-21.3063
NCGC00346713-05	AZD-4547	FGFR 3 Inhibitor	Phase II/III	-68.6597	-89.9616	-21.3019
NCGC00015155-11	Bepridil	Calcium Channel Blocker	Approved	-95.0886	-116.38	-21.2915
NCGC00379159-05	HI-TOPK-032			-97.6316	-118.917	-21.2853
NCGC00486944-01	NVS-PAK1-1	p21-Activated Kinase 1 (PAK1) Inhibitor	Biological Testing	-0.297532	-21.5816	-21.284
NCGC00159456-11	Imatinib	Bcr-Abl Inhibitor	Approved	-50.1067	-71.3407	-21.234
NCGC00179454-04	Monensin sodium salt	Polyether Antibiotic	Preclinical	-231.961	-253.177	-21.2159
NCGC00351607-06	GZD-824	Bcr-Abl Inhibitor	Preclinical	-255.911	-277.105	-21.1939
NCGC00384933-01		<MOA Unknown> | Class: Terpenoid | Genus: N/A | Family: N/A | Species: N/A		-6.71037	-27.8967	-21.1863
NCGC00181750-01	Cefozopran hydrochloride	Bacterial penicillin-binding protein Binding Agent		-19.7394	-40.9148	-21.1754
NCGC00018258-10	Econazole nitrate	Antifungal Agent	Approved	-21.4231	-42.5643	-21.1412
NCGC00263480-01	Medroxyprogesterone acetate	Progesterone Receptor Agonist	Approved	-70.8604	-91.9639	-21.1035
NCGC00387092-02	PF 429242	cholesterol biosynthetic process Inhibitor		-18.1728	-39.2249	-21.0521
NCGC00483076-02	Solithromycin	Streptococcus pneumoniae Inhibitor		-13.2622	-34.3118	-21.0496
NCGC00169059-03		<MOA Unknown> | Class: Alkaloid | Genus: Uncaria | Family: N/A | Species: tomentosa		-19.5666	-40.5836	-21.0171
NCGC00186465-06	MK-2206	AKT Inhibitor	Approved	-197.011	-218.016	-21.005
NCGC00347358-02		<MOA Unknown> | Class: Terpenoid | Genus: N/A | Family: N/A | Species: N/A		-113.782	-134.776	-20.9939
NCGC00384829-01		<MOA Unknown> | Class: Saponin | Genus: Saponaria | Family: Caryophyllaceae | Species: officinalis		-17.1341	-38.1263	-20.9922
NCGC00274063-01	Pimobendan	Phosphodiesterase III (PDE3) Inhibitor	Approved	-72.4587	-93.4178	-20.9591
NCGC00263216-02	Torin-2	mTOR Inhibitor	Preclinical	-316.957	-337.915	-20.9578
NCGC00386030-01		<MOA Unknown> | Class: Shikimi /Polyketide | Genus: Thunia | Family: Orchidaceae | Species: alba		-75.3502	-96.2482	-20.898
NCGC00378624-01	GNE-617 hydrochloride	Nicotinamide phosphoribosyltransferase Inhibitor		-411.013	-431.862	-20.8492
NCGC00160496-02	Amanozine			10.4273	-10.4214	-20.8488
NCGC00496795-01	WO2016044770			-222.115	-242.941	-20.8259
NCGC00181913-02	Difeterol	Histamine H1 receptor Antagonist		-17.4246	-38.2216	-20.797
NCGC00387039-04	Taselisib (GDC-0032)	PI3Kalpha Inhibitor	Phase III	-241.299	-262.09	-20.7914
NCGC00390643-01	Prexasertib	Chk1 Inhibitor	Phase II	-381.615	-402.372	-20.7564
NCGC00274073-01	N-Carbamyl-L-glutamic acid			11.1545	-9.56728	-20.7218
NCGC00485919-01	Telocinobufagin			-347.023	-367.732	-20.7088
NCGC00189287-01				-11.2714	-31.9763	-20.7048
NCGC00090708-05	8-Hydroxyquinoline	Trichophyton interdigitale Inhibitor		-23.4052	-44.1018	-20.6966
NCGC00386228-01	Roxithromycin	Macrolide Antibiotic		24.1355	3.44273	-20.6927
NCGC00166134-03	Estradiol Cypionate	Androgen Receptor Antagonist		2.47323	-18.197	-20.6702
NCGC00384523-01		cardiac muscle contraction Activator		-121.327	-141.984	-20.6574
NCGC00169814-02		<MOA Unknown> | Class: Shikimi | Genus: Terminalia | Family: Combretaceae | Species: avicennoides		-15.502	-36.1087	-20.6067
NCGC00347770-02		<MOA Unknown> | Class: Terpenoid | Genus: N/A | Family: N/A | Species: N/A		-114.827	-135.425	-20.5974
NCGC00408825-01	KT109	Sn1-specific diacylglycerol lipase beta Inhibitor		-7.89987	-28.4872	-20.5873
NCGC00346560-03	Telbivudine	DNA Polymerase Inhibitor	Approved	20.9543	0.368555	-20.5857
NCGC00381049-01		<MOA Unknown> | Class: N/A | Genus: N/A | Family: N/A | Species: N/A		-8.70702	-29.2913	-20.5842
NCGC00346836-09	GSK-2334470	Phosphoinositide Dependent Kinase Inhibitor	Preclinical	-139.354	-159.901	-20.5474
NCGC00168809-03		<MOA Unknown> | Class: Steroid | Genus: Nerium | Family: Apocynaceae | Species: oleander		-116.652	-137.144	-20.4918
NCGC00485983-01	Ginsenoside Rc	adipose tissue development Inhibitor		22.2872	1.89618	-20.3911
NCGC00179817-06	Andrographolide	TNF-alpha Production Inhibitor	Phase I	-78.2693	-98.6579	-20.3886
NCGC00387192-01	BIRT 377	"Intercellular adhesion molecule (ICAM-1), Integrin alpha-L/beta-2 Inhibitor"		-0.0307178	-20.3713	-20.3405
NCGC00181016-08	Bexarotene	Retinoid RXR Agonist	Approved	-73.7817	-94.1055	-20.3238
NCGC00384881-02		<MOA Unknown> | Class: Saponin | Genus: N/A | Family: N/A | Species: N/A		-257.496	-277.817	-20.321
NCGC00385156-01		<MOA Unknown> | Class: Saponin | Genus: N/A | Family: N/A | Species: N/A		-38.4907	-58.7216	-20.2309
NCGC00169630-02		<MOA Unknown> | Class: Shikimi | Genus: Lavendula | Family: Lamiaceae | Species: officinalis		-62.1735	-82.3775	-20.204
NCGC00182983-01	Fezatione			22.0971	1.92242	-20.1746
NCGC00484085-01	KPT-9274	PAK4/NAMPT	Phase I	-223.93	-244.097	-20.1671
NCGC00167471-02	Anethole trithione			0.946672	-19.2004	-20.147
NCGC00016612-05	Sulfadoxine	Dihydropteroate Synthase (DHPS) Inhibitor	Approved	10.8725	-9.26973	-20.1423
NCGC00386873-01				21.6202	1.49119	-20.129
NCGC00483924-01	Brigatinib	IGF-1R Inhibitor	Approved	-119.938	-140.057	-20.1193
NCGC00020328-05	DPH			-22.0897	-42.209	-20.1193
NCGC00180408-03		<MOA Unknown> | Class: Iridoid | Genus: Verbascum | Family: Scrophulariaceae | Species: giganteum		-10.1497	-30.2261	-20.0764
NCGC00016055-16	Trimethoprim	Bacterial dihydrofolate reductase Inhibitor		5.20234	-14.8422	-20.0446
NCGC00178500-19	Streptozocin		Approved	20.0424	0	-20.0424
NCGC00485924-01	Arenobufagin			-302.441	-322.472	-20.0313
NCGC00384907-01		neuron projection development Activator		-10.9574	-30.9746	-20.0172
NCGC00387119-01	SK1-I			-52.5717	-72.5787	-20.007
NCGC00241113-04	Orantinib	VEGFR-2 Inhibitor	Discontinued	-9.75928	-29.745	-19.9857
NCGC00378859-02	CHIR 090	UDP-3-O-[3-hydroxymyristoyl] N-acetylglucosamine deacetylase Inhibitor		-0.144492	-20.1244	-19.98
NCGC00387451-01	SD 2590 hydrochloride	Matrix metalloproteinase-9 Inhibitor		-4.94724	-24.915	-19.9677
NCGC00160681-03	Risocaine			2.6988	-17.2681	-19.9669
NCGC00384918-01		negative regulation of Wnt signaling pathway Inhibitor		-279.831	-299.798	-19.9665
NCGC00485984-01	Leuprolide (Acetate)			8.74978	-11.1942	-19.944
NCGC00166415-03	Palonosetron hydrochloride	Serotonin 3a (5-HT3a) receptor Antagonist		-3.05829	-22.9787	-19.9204
NCGC00181109-03	Decoquinate	Antiprotozoal agent		25.3597	5.45668	-19.903
NCGC00385072-01	Schisandrin C	<MOA Unknown> | Class: Shikimate | Genus: N/A | Family: N/A | Species: N/A		-26.9569	-46.8542	-19.8973
NCGC00386826-01				-63.3389	-83.2338	-19.895
NCGC00253579-01	Bolandiol dipropionate	Androgen Receptor Agonist		1.21692	-18.6267	-19.8437
NCGC00016047-11	1-[2-(Trifluoromethyl)phenyl]-1H-imidazole			20.7944	0.951847	-19.8425
NCGC00384630-01		<MOA Unknown> | Class: Terpenoid | Genus: Castilla | Family: Moraceae | Species: elastica		-259.435	-279.276	-19.8413
NCGC00263878-02	Meloxicam	Cyclooxygenase-1/2 Inhibitor	Approved	24.1586	4.34772	-19.8109
NCGC00506868-01	PF-06273340	Trk A/B/C Inhibitor	Discontinued	14.2615	-5.54585	-19.8073
NCGC00385761-01		<MOA Unknown> | Class: Shikimate | Genus: N/A | Family: N/A | Species: N/A		-103.998	-123.787	-19.7886
NCGC00390264-01	Cilengitide	Integrin alphavbeta3 (Vitronectin) Antagonist	Preclinical	27.9231	8.14566	-19.7775
NCGC00015480-17	GW-7647	PPARalpha Agonist	Preclinical	8.2048	-11.5536	-19.7584
NCGC00385955-01		<MOA Unknown> | Class: Shikimate | Genus: N/A | Family: N/A | Species: N/A		-2.90967	-22.654	-19.7444
NCGC00381148-01		<MOA Unknown> | Class: Sugar | Genus: N/A | Family: N/A | Species: N/A		-8.80025	-28.5354	-19.7351
NCGC00346683-02	YM-201636	PIKfyve Inhibitor	Biological Testing	-161.73	-181.449	-19.7181
NCGC00345858-02	Takeda-6d	VEGFR-2 Inhibitor	Biological Testing	-84.066	-103.78	-19.7139
NCGC00167491-04	Lenalidomide	TNF-alpha Production Inhibitor	Approved	-61.5677	-81.2661	-19.6984
NCGC00174007-13	PYRANTEL PAMOATE			-42.0109	-61.7085	-19.6976
NCGC00378867-01	SEA0400	Sodium/calcium exchanger 1 Blocker		-10.3782	-30.0555	-19.6773
NCGC00165987-03	3-Phenyl-1-propanol			19.6365	0	-19.6365
NCGC00485648-01	S-15176 difumarate salt	Oxidative Stress Inhibitor		-16.3652	-35.9673	-19.6021
NCGC00346936-09	GNF-5837	Trk A/B/C Inhibitor	Preclinical	-44.4496	-64.0391	-19.5896
NCGC00344550-01	Stanozolol	Synthetic Steroid	Approved	1.01117	-18.5668	-19.5779
NCGC00091109-04	Neohesperidin Dihydrochalcone (Nhdc)	synthetic sugar substitute		20.5392	0.99438	-19.5448
NCGC00262955-01	Oxycinchophen			11.0199	-8.48542	-19.5054
NCGC00262964-01	Viloxazine hydrochloride			20.7308	1.2442	-19.4866
NCGC00485038-01	5Î²-Pregnan-3Î±-ol-20-one	Gamma-aminobutyric acid receptor subunit gamma-2 Negative Allosteric Modulator		-6.40511	-25.7524	-19.3473
NCGC00386739-01	AK 1	NAD-dependent deacetylase sirtuin 2 Inhibitor		-8.17628	-27.4909	-19.3146
NCGC00021305-08	Sirolimus	mTOR Inhibitor	Approved	-191.524	-210.817	-19.2933
NCGC00387169-01	Carbazeran citrate	cAMP metabolic process Modulator		2.82306	-16.44	-19.263
NCGC00167512-03	Everolimus	mTOR inhibitor	Approved	-199.795	-219.011	-19.2156
NCGC00389373-02	ICG-001	Wnt Signaling Inhibitor	Preclinical	-79.9152	-99.1207	-19.2055
NCGC00510478-01	ARV-771	Brd4 Inhibitor	Preclinical	-314.979	-334.15	-19.1704
NCGC00015209-11	Cyclophosphamide	Bcl-2 Expression Inhibitor	Approved	14.2723	-4.86692	-19.1392
NCGC00346716-14	Dabrafenib	Raf kinase B Inhibitor	Approved	-28.3484	-47.4781	-19.1297
NCGC00167845-02	Dichloroacetic acid			22.1124	3.03059	-19.0818
NCGC00485917-01	VT-464 (R enantiomer)	Cytochrome P450 17A1 Inhibitor		-1.32418	-20.3833	-19.0591
NCGC00483925-02	Glesatinib	VEGFR-1/2/3 Inhibitor	Phase II	-134.699	-153.75	-19.0507
NCGC00420854-01				22.7468	3.70776	-19.039
NCGC00164487-02	4,4'-Diamino-2,2'-stilbenedisulfonic acid			20.7681	1.78623	-18.9818
NCGC00378591-01	HG-9-91-01	Serine/threonine-protein kinase SIK3 Inhibitor		-28.3625	-47.3423	-18.9798
NCGC00386896-01				15.3631	-3.61136	-18.9745
NCGC00162400-09	Staurosporine	CDK1/2 Inhibitor	Preclinical	-315.749	-334.699	-18.9505
NCGC00385999-01		<MOA Unknown> | Class: Terpenoid | Genus: N/A | Family: N/A | Species: N/A		-247.809	-266.715	-18.9057
NCGC00384185-01	IRE-3	Serine/threonine-protein kinase/endoribonuclease IRE1 Inhibitor		-156.738	-175.633	-18.8942
NCGC00486936-01	CHMFL-FLT3-122			-146.481	-165.375	-18.8935
NCGC00384640-01		<MOA Unknown> | Class: Terpenoid | Genus: N/A | Family: N/A | Species: N/A		-9.18391	-28.0699	-18.886
NCGC00385607-01		<MOA Unknown> | Class: Terpenoid | Genus: N/A | Family: N/A | Species: N/A		-110.081	-128.949	-18.868
NCGC00379200-06	ML277	Voltage-gated potassium channel subunit Kv7.1 Activator		-28.2016	-47.0672	-18.8656
NCGC00380940-01		<MOA Unknown> | Class: Terpenoid | Genus: N/A | Family: N/A | Species: N/A		-38.5657	-57.4089	-18.8432
NCGC00164576-04	Lopinavir	HIV Protease Inhibitors		-14.2717	-33.0876	-18.8159
NCGC00263097-03	Cediranib	VEGFR-1/2/3 Inhibitor	Phase III	-84.7402	-103.541	-18.801
NCGC00016866-11	Pipemidic acid			25.4985	6.69907	-18.7994
NCGC00015397-10	Ethamivan			22.0307	3.25321	-18.7775
NCGC00485193-01	L-368,899	Oxytocin receptor Antagonist		12.1128	-6.66382	-18.7766
NCGC00487402-01	IQ-1S			-17.2006	-35.9728	-18.7722
NCGC00180342-02		<MOA Unknown> | Class: Alkaloid | Genus: N/A | Family: N/A | Species: N/A		-5.51947	-24.2683	-18.7489
NCGC00380465-01		<MOA Unknown> | Class: N/A | Genus: N/A | Family: N/A | Species: N/A		-4.51982	-23.2494	-18.7295
NCGC00485405-01	PF-04725379	"Glutamate receptor ionotropic, AMPA Positive Allosteric Modulator"		-5.19325	-23.9153	-18.722
NCGC00016360-07	Monobenzone	topical medical depigmentation treatment	Approved	-88.455	-107.173	-18.7184
NCGC00263172-10	DCC-2036	Bcr-Abl Inhibitor	Phase I/II	-76.0064	-94.717	-18.7106
NCGC00387791-01	LY 301497	PI3K Inhibitor		-149.07	-167.747	-18.6772
NCGC00017245-10	Ellagic acid	Aldose Reductase Inhibitor	Preclinical	11.1881	-7.43456	-18.6226
NCGC00386859-01				18.4937	-0.128769	-18.6225
NCGC00388282-01	MK2 Inhibitor IV			-36.0044	-54.617	-18.6126
NCGC00346695-02	MK-2461	VEGFR-1 (Flt-1) Inhibitors	Phase I/II	-55.8208	-74.4321	-18.6113
NCGC00263232-02	GLS-968	Glutaminase Inhibitor	Biological Testing	-14.9697	-33.5653	-18.5956
NCGC00169908-02		<MOA Unknown> | Class: aromatic polyketide | Genus: N/A | Family: N/A | Species: N/A		-14.8394	-33.4233	-18.5839
NCGC00169728-02		<MOA Unknown> | Class: peptide | Genus: N/A | Family: N/A | Species: N/A		-51.2018	-69.7809	-18.5791
NCGC00345819-01	Estetrol	Selective Estrogen Receptor Modulators (SERM)	Phase II	6.50317	-12.0753	-18.5784
NCGC00255225-01	Menadione	Cell Division Cycle CDC25 Phosphatase Inhibitor	Phase II	-8.38887	-26.9291	-18.5402
NCGC00485222-01	Antimycin A from Streptomyces sp.	Cytochrome b-c1 complex subunit 7 Inhibitor		-215.786	-234.317	-18.5317
NCGC00263858-02	Carboplatin	DNA Alkylating Agent	Approved	-8.30107	-26.7998	-18.4987
NCGC00387818-01	BZ-423			-18.5819	-37.0602	-18.4783
NCGC00016012-12	Triflupromazine hydrochloride	Muscarinic acetylcholine receptor M2 Antagonist		-30.8663	-49.3279	-18.4616
NCGC00385881-01	1-O-Acetylbritannilactone	<MOA Unknown> | Class: Terpenoid | Genus: N/A | Family: N/A | Species: N/A		-8.2661	-26.7191	-18.453
NCGC00091519-09	p-Cresol			27.0946	8.65647	-18.4382
NCGC00016551-04	Meprylcaine hydrochloride	"Sodium channel alpha subunits; brain (Types I, II, III) Inhibitor"		-13.495	-31.8837	-18.3887
NCGC00485427-01	Purmorphamine		Preclinical	-6.04172	-24.4043	-18.3626
NCGC00346959-08	HMSL10038	Lck Kinase Inhibitor	Biological Testing	-99.2507	-117.549	-18.2982
NCGC00253627-01	Pleconaril	Human rhinovirus A protease Inhibitor		10.4651	-7.83271	-18.2978
NCGC00183016-01	Cefteram			-3.32505	-21.5952	-18.2701
NCGC00507887-01	ML-390	DHODH Inhibitor	Preclinical	-55.5097	-73.7438	-18.2341
NCGC00402261-03	Filastatin			-39.8173	-58.0282	-18.2109
NCGC00164632-07	TIBOLONE	Steryl-sulfatase Inhibitor		-5.89245	-24.0859	-18.1934
NCGC00183854-01	Oxendolone			-49.8919	-68.0798	-18.1879
NCGC00387188-01	WIN 18446	Retinal dehydrogenase 2 Inhibitor		0.122383	-18.0605	-18.1829
NCGC00386583-02	PSNCBAM-1	Cannabinoid CB1 receptor Negative Allosteric Modulator		-0.275317	-18.41	-18.1347
NCGC00242217-09	GW-843682X	Polo-like Kinase-1 (Plk-1) Inhibitor	Biological Testing	-129.806	-147.877	-18.0714
NCGC00186464-03	Aliskiren hemifumarate	Renin Inhibitor	Approved	-23.3103	-41.3713	-18.0611
NCGC00015701-06	Metyrosine	Tyrosine 3-hydroxylase Inhibitor		20.6113	2.56222	-18.0491
NCGC00351602-05	AP-26113	ALK Inhibitor	Biological Testing	-93.8696	-111.916	-18.046
NCGC00263163-11	SGX-523	HGFR Inhibitor	Phase I	2.96611	-15.0152	-17.9814
NCGC00380855-01		<MOA Unknown> | Class: steroid | Genus: Thevetia | Family: Apocynaceae | Species: plumeriaefolia		-63.2955	-81.2699	-17.9744
NCGC00168796-02		sodium ion transport Activator		-13.3677	-31.3267	-17.9591
NCGC00485142-01	Picrotoxinin	Glycine receptor subunit alpha-2 Blocker		19.2442	1.28613	-17.9581
NCGC00018181-12	Nalidixic acid	Quinoline Antibiotic		1.11242	-16.8433	-17.9557
NCGC00263224-03	D-NMAPPD	Ceramidase Inhibitor	Preclinical	-2.40642	-20.3346	-17.9282
NCGC00386678-02	EMPA	Orexin receptor 2 Antagonist		19.7219	1.79828	-17.9236
NCGC00385625-01		<MOA Unknown> | Class: N/A | Genus: N/A | Family: N/A | Species: N/A		-25.232	-43.1553	-17.9233
NCGC00387133-01	5 -Fluoroindirubinoxime			-117.051	-134.968	-17.9165
NCGC00160547-02	Fomocaine			-7.78736	-25.6918	-17.9044
NCGC00169057-02		<MOA Unknown> | Class: Iridoid | Genus: Parentucellia | Family: Scrophulariaceae | Species: viscosa		-12.9615	-30.8399	-17.8784
NCGC00015774-06	Oxatomide	Histamine H1 receptor Antagonist		-28.5908	-46.4634	-17.8726
NCGC00164533-02	Buformin	"AMP-activated protein kinase, AMPK Activator"		18.4548	0.610682	-17.8441
NCGC00379255-06	FRAX-486	p21-Activated Kinase 1 (PAK1) Inhibitor	Preclinical	-142.812	-160.645	-17.833
NCGC00386890-01				6.54809	-11.2737	-17.8218
NCGC00182059-03	Febuxostat	Xanthine Oxidase Inhibitor	Approved	18.1992	0.386233	-17.813
NCGC00263135-02	Piraxostat	Xanthine Oxidase Inhibitor	Discontinued	-158.277	-176.057	-17.7795
NCGC00163385-14	PP2			-38.056	-55.8279	-17.772
NCGC00351541-01				16.8857	-0.850965	-17.7367
NCGC00386011-01		<MOA Unknown> | Class: N/A | Genus: N/A | Family: N/A | Species: N/A		-10.6571	-28.38	-17.7229
NCGC00384876-01		<MOA Unknown> | Class: Steroide | Genus: N/A | Family: N/A | Species: N/A		-231.445	-249.149	-17.7047
NCGC00023414-05	Naproxen Sodium	Cyclooxygenase-1/2 Inhibitor		10.2431	-7.45921	-17.7023
NCGC00386905-01				21.768	4.07081	-17.6972
NCGC00402358-01	Epacadostat	IDO Inhibitor	Phase III	5.23004	-12.4515	-17.6815
NCGC00262939-01	Cycotiamine			0.0425929	-17.6131	-17.6557
NCGC00390557-01	IRAK inhibitor 4 (trans)	Interleukin-1 receptor-associated kinase 4 Inhibitor		-52.8104	-70.4588	-17.6484
NCGC00180255-02		<MOA Unknown> | Class: Saponin | Genus: Canthium | Family: Rubiaceae | Species: sp.		-16.9844	-34.5974	-17.6129
NCGC00263152-14	Ponatinib	FGFR Inhibitor	Approved	-236.693	-254.301	-17.6089
NCGC00164581-02	Estramustine	Estrogen receptor beta Modulator	Approved	-21.7682	-39.3314	-17.5632
NCGC00385161-01		<MOA Unknown> | Class: Iridoid | Genus: Plumeria | Family: Apocynaceae | Species: rubra		-57.2621	-74.786	-17.524
NCGC00090970-03	Maleic acid	"NADP-dependent malic enzyme, mitochondrial Inhibitor"		22.6628	5.1447	-17.5181
NCGC00165740-14	Benazepril	Angiotensin-I Converting Enzyme Inhibitor	Approved	21.5259	4.02036	-17.5056
NCGC00385875-01		<MOA Unknown> | Class: Terpenoid | Genus: N/A | Family: N/A | Species: N/A		9.03029	-8.47435	-17.5046
NCGC00016324-09	Sulfamethoxypyridazine			-23.338	-40.8265	-17.4885
NCGC00480866-02	BIO-Acetoxime			-122.263	-139.722	-17.4587
NCGC00253638-01	Acephylline	Adenosine A2b receptor Antagonist		27.0177	9.56934	-17.4483
NCGC00162288-12	Valproic acid sodium salt	GSK-3 Inhibitor	Approved	2.547	-14.8912	-17.4382
NCGC00370827-02	A 943931	Histamine H4 receptor Antagonist		-39.3003	-56.7334	-17.4331
NCGC00384201-02	WDR5 0103	MLL1/ASH2L/RBBP5/WDR5 complex Inhibitor		14.2943	-3.13294	-17.4272
NCGC00169138-03		<MOA Unknown> | Class: Polyketide | Genus: N/A | Family: N/A | Species: N/A		-36.8389	-54.2621	-17.4231
NCGC00385467-01		<MOA Unknown> | Class: Terpenoid | Genus: N/A | Family: N/A | Species: N/A		0.0177838	-17.391	-17.4088
NCGC00180641-02		Sodium/potassium-transporting ATPase Inhibitor		-288.597	-305.974	-17.3774
NCGC00183881-01	Moxifloxacin hydrochloride	DNA Topoisomerase IV Inhibitor	Approved	3.37581	-14.0003	-17.3761
NCGC00091238-03	2,2'-Dithiobisbenzothiazole			-51.4133	-68.7852	-17.3719
NCGC00386401-02	Ravoxertinib	ERK1 Inhibitor	Phase I	-63.8701	-81.2318	-17.3616
NCGC00159521-16	Zoledronic acid monohydrate	Farnesyl Pyrophosphate Synthase Inhibitor	Approved	17.6472	0.302107	-17.3451
NCGC00180429-03		SW1990 Inhibitor		-2.43913	-19.7619	-17.3228
NCGC00180737-03		<MOA Unknown> | Class: nucleoside | Genus: N/A | Family: N/A | Species: N/A		-12.2022	-29.5119	-17.3097
NCGC00016345-08	4-Methylumbelliferone	MAO-A Inhibitor	Not determined	8.52839	-8.77247	-17.3009
NCGC00378899-03	SR 3335	Nuclear receptor ROR-alpha Inverse Agonist		0.910907	-16.3694	-17.2803
NCGC00370685-02	JNJ-40418677	Gamma-secretase Inhibitor		-70.8865	-88.1424	-17.2559
NCGC00378818-01	FIIN 1 hydrochloride	Vascular endothelial growth factor receptor 3 Inhibitor		-143.928	-161.174	-17.2458
NCGC00169912-03		<MOA Unknown> | Class: polyketide/shikimi; Alkaloid | Genus: N/A | Family: N/A | Species: N/A		-38.5607	-55.784	-17.2234
NCGC00402234-02	RU-505	Beta amyloid A4 protein Binding Agent		-108.498	-125.712	-17.2145
NCGC00390366-01	Bosutinib(SKI-606)			-129.856	-147.067	-17.2108
NCGC00095176-08	Modafinil	Dopamine transporter Inhibitor		23.4291	6.23617	-17.193
NCGC00016668-06	Salicylic acid dihydrogen phosphate	Tyrosine-protein kinase SRC Inhibitor		29.3822	12.1901	-17.1921
NCGC00164620-02	Nadifloxacin	DNA gyrase Inhibitor		1.09101	-16.0979	-17.1889
NCGC00250399-05	Vemurafenib	Raf kinase B Inhibitor	Approved	-69.8235	-87.0104	-17.1869
NCGC00476210-01	GNF-7	Bcr-Abl Inhibitor	Preclinical	-247.928	-265.095	-17.167
NCGC00386933-01				20.2097	3.06889	-17.1408
NCGC00346509-08	GSK-615	PI3Kalpha Inhibitor	Discontinued	-176.849	-193.953	-17.1042
NCGC00385462-01		<MOA Unknown> | Class: Diterpen | Genus: Cistus | Family: Cistaceae | Species: ladanifer		-13.2547	-30.3275	-17.0729
NCGC00253682-01	5,6-Dimethoxy-1-indanone			6.9499	-10.1097	-17.0596
NCGC00092379-02	CGH 2466 dihydrochloride			4.75776	-12.2986	-17.0564
NCGC00380613-01		<MOA Unknown> | Class: Peptide | Genus: N/A | Family: N/A | Species: N/A		-42.5083	-59.5621	-17.0538
NCGC00167490-03	Lumefantrine	antimalarial agents	Approved	-24.5142	-41.5226	-17.0083
NCGC00163335-03	D-Leucine	Mammalian target of Rapamycin (mTORC1) Activator		24.2309	7.22391	-17.007
NCGC00018176-05	Estrone	Steroid hormone	Approved	-50.4854	-67.4871	-17.0016
NCGC00024633-07	AMI-193	Serotonin 2c (5-HT2c) receptor Antagonist		-59.8249	-76.8072	-16.9823
NCGC00379028-02	PSI-6130	Hepatitis C virus NS5B RNA-dependent RNA polymerase Inhibitor		19.5499	2.58866	-16.9613
NCGC00386313-08	Berzosertib	ATR Kinase Inhibitor	Phase II	-245.301	-262.26	-16.959
NCGC00483924-02	Brigatinib	IGF-1R Inhibitor	Approved	-128.933	-145.867	-16.9343
NCGC00381091-01		<MOA Unknown> | Class: Shikimi | Genus: Solanum | Family: Solanaceae | Species: sp.		-57.2293	-74.1617	-16.9324
NCGC00164491-02	Lidofenin			9.8027	-7.12743	-16.9301
NCGC00356072-05	OG-L002	Lysine-specific histone demethylase 1 Inhibitor		12.3635	-4.55096	-16.9144
NCGC00390222-01	XL647			-85.5851	-102.496	-16.9108
NCGC00386932-01				15.7809	-1.1206	-16.9015
NCGC00381200-01		<MOA Unknown> | Class: N/A | Genus: N/A | Family: N/A | Species: N/A		-11.3282	-28.2247	-16.8965
NCGC00380307-01		<MOA Unknown> | Class: Alkaloid | Genus: N/A | Family: N/A | Species: N/A		-174.207	-191.054	-16.8467
NCGC00378902-05	Toceranib	VEGFR Inhibitor	Preclinical	-45.4497	-62.2938	-16.8441
NCGC00408936-01				17.3123	0.481464	-16.8308
NCGC00181129-08	Dasatinib	Bcr-Abl Inhibitor	Approved	-250.453	-267.284	-16.8306
NCGC00183026-01	Dicethiamine hydrochloride			-26.6389	-43.4581	-16.8193
NCGC00390881-02				9.14642	-7.66909	-16.8155
NCGC00485881-01	Duloxetine metabolite Para-Naphthol Duloxetine			-12.3313	-29.1378	-16.8065
NCGC00186028-02	Levetiracetam	N-Type Calcium Channel (Ca(v) 2.2) Blocker	Approved	30.8325	14.0351	-16.7974
NCGC00025345-02	Atomoxetine hydrochloride	Serotonin transporter Inhibitor		-17.0865	-33.8794	-16.7929
NCGC00386906-01				14.7332	-2.05812	-16.7913
NCGC00347528-02	Rhodomyrtone A	<MOA Unknown> | Class: Polyketide | Genus: N/A | Family: N/A | Species: N/A		-80.6121	-97.3971	-16.7851
NCGC00263557-01	Tolterodine	Muscarinic M3 Antagonists		-30.0689	-46.8415	-16.7726
NCGC00166088-10	Decitabine	DNA Methyltransferase (DNMT) Inhibitor	Approved	-150.299	-167.067	-16.7676
NCGC00159485-06	Ethylenediaminetetraacetic acid ferric sodium salt	Lead Chelating Agent		21.1382	4.37735	-16.7609
NCGC00370942-04	Pifithrin-? (hydrobromide)	Cellular tumor antigen p53 Inhibitor		-8.61269	-25.3672	-16.7545
NCGC00179580-04	Biotin			27.6186	10.9062	-16.7124
NCGC00164549-02	Dofetilide	K(V)11.1 (erg1) Channel Blocker	Approved	29.4968	12.7915	-16.7053
NCGC00164605-02	Ampiroxicam	Cyclooxygenase Inhibitor		17.4234	0.719128	-16.7043
NCGC00263654-01	Bopindolol			9.01488	-7.68657	-16.7015
NCGC00168114-09	IC-87114	PI3K Inhibitor	Preclinical	-97.1527	-113.851	-16.6985
NCGC00262575-02	Cyproterone acetate	Androgen Receptor Antagonist	Approved	-66.4958	-83.1671	-16.6712
NCGC00161621-05	Cepharanthine			-59.977	-76.626	-16.6491
NCGC00017245-15	Ellagic acid	Aldose Reductase Inhibitor	Preclinical	-16.9157	-33.5627	-16.647
NCGC00485175-01	WS-12	Transient receptor potential cation channel subfamily M member 8 Agonist		-7.43148	-24.0757	-16.6443
NCGC00253568-01	Zinc octanoate	Solute carrier family 22 member 8 Substrate		14.5505	-2.09196	-16.6425
NCGC00384172-01	WDR5-C47	Inhibitor of WDR5-MLL interaction. Not the mest WDR5-MLL Inhibitor available but this one offers a different chemotype.	Biological Testing	-4.10207	-20.7443	-16.6422
NCGC00189074-12	PD-184352	MEK Inhibitor	Discontinued	-30.7939	-47.4179	-16.624
NCGC00381332-01		<MOA Unknown> | Class: sesquiterpene/shikimi | Genus: N/A | Family: N/A | Species: N/A		-12.8174	-29.4141	-16.5967
NCGC00263121-03	MG-149	Histone acetyltransferase Inhibitor	Biological Testing	-4.59691	-21.1899	-16.593
NCGC00015769-14	Strophantine octahydrate	Sodium/potassium-transporting ATPase subunit alpha-3 Inhibitor	Preclinical	-269.861	-286.409	-16.5482
NCGC00356417-04	LLY-507	SMYD2 Inhibitor	Biological Testing	-68.3495	-84.896	-16.5465
NCGC00351550-03	GSK J5			-10.9076	-27.4521	-16.5444
NCGC00381554-06	MK-5108 (VX-689)	Aurora A Inhibitor		-111.35	-127.894	-16.5436
NCGC00016624-05	Diphenidol	Muscarinic acetylcholine receptor M5 Antagonist		-62.6331	-79.1671	-16.534
NCGC00385344-01		<MOA Unknown> | Class: Terpenoid | Genus: N/A | Family: N/A | Species: N/A		11.7163	-4.78457	-16.5008
NCGC00371443-05	KDM5-C70	KDM5A/KDM5B Inhibitor	Biological Testing	-33.3941	-49.8856	-16.4915
NCGC00159491-08	Rimantadine	M2 Channel Inhibitor	Approved	26.8138	10.3539	-16.4599
NCGC00168841-03		<MOA Unknown> | Class: Terpenoid | Genus: Conocephalum | Family: N/A | Species: conicum		-16.716	-33.1505	-16.4345
NCGC00263234-01	IDH-001	IDH1 Inhibitor	Biological Testing	4.20499	-12.2009	-16.4059
NCGC00346681-07	NVP-BGT226	PI3K Inhibitor	Phase I/II	-318.137	-334.539	-16.4019
NCGC00091575-03	2-Ethyl-1,3-hexanediol			21.9722	5.59104	-16.3812
NCGC00185774-06	Erdosteine	Mucolytic Agent	Approved	-5.8366	-22.2051	-16.3685
NCGC00168266-02	1-(1,3-Benzodioxol-5-yl)-N-methylpropan-2-amine hydrochloride			-8.70564	-25.031	-16.3254
NCGC00015523-13	Hydroquinone			-30.5706	-46.8729	-16.3023
NCGC00384525-01		<MOA Unknown> | Class: Terpenoid | Genus: N/A | Family: N/A | Species: N/A		-67.3261	-83.623	-16.2969
NCGC00408885-01	RP-106	Glycogen synthase kinase-3 beta Inhibitor		-58.8906	-75.1861	-16.2955
NCGC00016954-10	(-)-Quinpirole hydrochloride	Dopamine D4 receptor Agonist		12.269	-3.9956	-16.2646
NCGC00351596-02	AZD-3463	ALK Inhibitor	Preclinical	-131.356	-147.592	-16.236
NCGC00381221-01		<MOA Unknown> | Class: N/A | Genus: N/A | Family: N/A | Species: N/A		-16.8079	-33.0355	-16.2276
NCGC00347958-03	WS-3	beta Cell Proliferation Inducer	Biological Testing	-223.629	-239.85	-16.2218
NCGC00016274-10	Phenazone			16.202	0	-16.202
NCGC00263164-14	Cabozantinib	VEGFR-2 Inhibitor	Approved	-103.862	-120.043	-16.1815
NCGC00421835-01				18.9822	2.82159	-16.1607
NCGC00384811-01		inflammatory response to antigenic stimulus Inhibitor		-23.5558	-39.7023	-16.1465
NCGC00389365-01	Cidofovir	DNA Polymerase Inhibitors	Approved	-35.5174	-51.651	-16.1336
NCGC00386271-02	CNX-2006	EGFR Inhibitor	Preclinical	-65.8114	-81.944	-16.1326
NCGC00178707-06	Ramelteon	Melatonin MT1/MT2 Agonist	Approved	24.8938	8.76731	-16.1265
NCGC00386332-03	Losmapimod	MAP kinase p38 beta Inhibitor	Phase II	-39.903	-56.0294	-16.1264
NCGC00091449-10	Eugenol	reactive oxygen species biosynthetic process Modulator		23.6612	7.53648	-16.1247
NCGC00015754-17	Nilutamide	Androgen Receptor Antagonist	Approved	17.851	1.73501	-16.1159
NCGC00161419-06	Trimetrexate	Dihydrofolate Reductase (DHFR) Inhibitor	Phase II	-137.257	-153.369	-16.1124
NCGC00386185-01	Amoxicillin Sodium	beta-lactam antibiotic		-24.7601	-40.8652	-16.1051
NCGC00179599-03	Cefoperazone sodium	Cephalosporin antibiotic		-1.40779	-17.5081	-16.1003
NCGC00378703-02	Mirodenafil (dihydrochloride)	Phosphodiesterase 5A Inhibitor		-5.72689	-21.8081	-16.0812
NCGC00351477-09	UNC-1999	EZH1 Inhibitor	Preclinical	-60.0692	-76.1221	-16.0529
NCGC00094571-10	Crotamiton	antipruritic	Approved	5.16064	-10.8763	-16.0369
NCGC00386018-01		<MOA Unknown> | Class: Terpenoid | Genus: N/A | Family: N/A | Species: N/A		-121.515	-137.54	-16.0245
NCGC00485267-01	MB-3	Histone acetyltransferase KAT2A Inhibitor		22.4983	6.47549	-16.0228
NCGC00384783-01		<MOA Unknown> | Class: Alkaloid | Genus: N/A | Family: N/A | Species: N/A		-1.91385	-17.9154	-16.0016
NCGC00385973-01		<MOA Unknown> | Class: Terpenoid | Genus: N/A | Family: N/A | Species: N/A		1.57432	-14.4062	-15.9805
NCGC00347399-02		inflammatory response Inhibitor		-20.0311	-35.9863	-15.9551
NCGC00485889-01	DBPR108	Dipeptidyl peptidase IV Inhibitor		3.53827	-12.41	-15.9482
NCGC00344481-01	PRP01-012	Yes1 Kinase Inhibitor	Biological Testing	-45.9935	-61.924	-15.9305
NCGC00485380-01	N2-Ethyl-2â€²-deoxyguanosine	DNA topoisomerase I Modulator		21.6933	5.77632	-15.917
NCGC00241112-05	RWJ-67657	p38 MAPK Inhibitor	Phase I	-41.9248	-57.8413	-15.9165
NCGC00380968-01		<MOA Unknown> | Class: N/A | Genus: N/A | Family: N/A | Species: N/A		-4.26867	-20.1698	-15.9012
NCGC00388700-03	KDOAM-25	Lysine-specific demethylase 5D Inhibitor		17.4879	1.59837	-15.8895
NCGC00017344-11	Fisetin	Histone Deacetylase/SIRT1 Activator	Preclinical	-18.714	-34.5952	-15.8812
NCGC00015786-20	PINDOLOL	Serotonin 1a (5-HT1a) receptor Antagonist		17.442	1.5662	-15.8758
NCGC00479249-03	Enasidenib	IDH1 Inhibitor	Approved	-25.5525	-41.4169	-15.8644
NCGC00163754-04	Metalaxyl			21.1901	5.33848	-15.8516
NCGC00263949-02	Piperacillin sodium salt	Penicillin-binding protein 2B Binding Agent		23.5938	7.74809	-15.8457
NCGC00356119-01	GSK-2801	BAZ2B Inhibitor	Preclinical	13.0438	-2.78724	-15.831
NCGC00346490-06	OSU-03012	Phosphoinositide Dependent Kinase Inhibitor	Phase I	-98.2318	-114.061	-15.8296
NCGC00386757-02	OTX-008	Allosteric Inhibitor of galectin-1	Phase I	1.8293	-13.9718	-15.8011
NCGC00242489-02	LG-100268	RXR Agonist	Preclinical	9.88856	-5.90148	-15.79
NCGC00091104-10	Aspartame	Synthetic sugar substitute	Approved	6.02662	-9.76278	-15.7894
NCGC00015468-06	GW2974	Receptor protein-tyrosine kinase erbB-2 Inhibitor		-23.4945	-39.2838	-15.7892
NCGC00168912-02		<MOA Unknown> | Class: Steroid | Genus: Nerium | Family: Apocynaceae | Species: oleander		-176.928	-192.717	-15.7884
NCGC00346681-09	NVP-BGT226	PI3K Inhibitor	Phase I/II	-325.581	-341.358	-15.7772
NCGC00510200-01	MRT-83	Hedgehog Antagonist	Preclinical	-53.1059	-68.8685	-15.7626
NCGC00010037-04				7.88435	-7.8762	-15.7605
NCGC00181776-02	Dicyclopentamethylenethiuram disulfide			-17.7284	-33.4826	-15.7542
NCGC00168851-03		leukotriene B4 biosynthetic process Inhibitor		-4.93603	-20.6902	-15.7542
NCGC00386647-01	JAK2 inhibitor 13	Tyrosine-protein kinase JAK2 Inhibitor		-4.12954	-19.8716	-15.742
NCGC00159340-05	Tazobactam sodium	Bacterial beta-lactamase TEM Inhibitor		20.2157	4.49286	-15.7228
NCGC00485023-01	PF-03882845	Mineralocorticoid receptor Antagonist		5.02483	-10.6657	-15.6905
NCGC00379152-02	VUF 10166	Serotonin 3a (5-HT3a) receptor Antagonist		18.3925	2.70874	-15.6837
NCGC00522572-01	GDC-0339	Pim-1/2/3 Kinase Inhibitor	Preclinical	-381.271	-396.95	-15.6787
NCGC00385074-01		GABA(A) Receptor Antagonists		-10.9597	-26.6338	-15.6741
NCGC00016401-09	Hydroflumethiazide	Thiazide-sensitive sodium-chloride cotransporter Inhibitor		-41.8115	-57.4817	-15.6702
NCGC00253690-01	Imidoline	Dopamine receptor Blocker		30.3859	14.7304	-15.6555
NCGC00344510-06	NPS-2143	Calcium-Sensing Receptor (CaSR) Antagonist	Preclinical	-71.9849	-87.6348	-15.6498
NCGC00385334-01		<MOA Unknown> | Class: N/A | Genus: N/A | Family: N/A | Species: N/A		2.91394	-12.7359	-15.6498
NCGC00015836-12	Pirenzepine	Muscarinic acetylcholine receptor M1 Antagonist		-43.5974	-59.246	-15.6487
NCGC00387225-01	SB 706504	MAP kinase p38 alpha Inhibitor		-87.9731	-103.616	-15.6428
NCGC00247355-02	Sufentanil citrate	Sodium channel protein type II alpha subunit Inhibitor		-52.2283	-67.8606	-15.6323
NCGC00015205-10	PK-11195	Pregnane X Receptor (PXR) Agonist	Clinical	12.9134	-2.71647	-15.6299
NCGC00482799-01	GSK-2256098	Focal Adhesion Kinase (FAK) Inhibitor	Phase II	-2.1738	-17.7911	-15.6173
NCGC00162380-06	CGP 57380	MAP kinase-interacting serine/threonine-protein kinase MNK1 Inhibitor		-58.4388	-74.04	-15.6012
NCGC00180796-02	Withaferin A	NF-kappaB (NFKB) Activation Inhibitor	Preclinical	-201.886	-217.482	-15.5956
NCGC00387761-01	2,3-Dihydro-3-oxo-6-(2-phenylpyrazolo[1,5-a]pyridin-3-yl)-4-pyridazinecarboxylic acid			24.1385	8.552	-15.5865
NCGC00257426-01	Piragliatin			-24.9492	-40.531	-15.5817
NCGC00378903-01	KD-025	ROCK 2 Inhibitor	Phase II	-40.913	-56.4906	-15.5776
NCGC00347850-02		<MOA Unknown> | Class: Terpenoid | Genus: N/A | Family: N/A | Species: N/A		-94.0092	-109.585	-15.5761
NCGC00408862-01	DFPM	root development Inhibitor		8.07992	-7.49084	-15.5708
NCGC00346534-03	MC-1568	HDAC Inhibitor	Preclinical	-35.5599	-51.1149	-15.555
NCGC00013082-04	trans-Aconitic acid	Cytoplasmic aconitate hydratase Substrate		0.773608	-14.7447	-15.5183
NCGC00262995-02	ML-364	Ubiquitin C-terminal Hydrolase 2 (USP2) Inhibitor	Biological Testing	-70.1077	-85.6176	-15.5099
NCGC00385195-01		<MOA Unknown> | Class: N/A | Genus: N/A | Family: N/A | Species: N/A		-115.743	-131.244	-15.5014
NCGC00169685-02		<MOA Unknown> | Class: Steroid | Genus: Teucrium | Family: Labiatea | Species: sp.		20.685	5.18445	-15.5005
NCGC00016010-09	Terbutaline hemisulfate	cAMP biosynthetic process Partial Agonist		-10.9135	-26.382	-15.4685
NCGC00025122-02	Stilonium iodide			-134.566	-150.032	-15.4665
NCGC00168996-02		<MOA Unknown> | Class: Sesquiterpen | Genus: Tithonia | Family: Compositae | Species: sp.		-68.041	-83.4965	-15.4554
NCGC00381407-02		<MOA Unknown> | Class: Sesquiterpen | Genus: Smyrnium | Family: Umbelliferae | Species: olusatrum		-6.11218	-21.567	-15.4549
NCGC00095322-05	Coenzyme Q10	mitochondrial electron transport	Approved	16.7595	1.314	-15.4455
NCGC00166121-03	Tetradonium bromide			-202.735	-218.158	-15.4232
NCGC00351598-08	WHI-P154	EGFR Inhibitor	Preclinical	-36.2357	-51.6569	-15.4212
NCGC00095135-05	Almotriptan	5-HT1B Agonist	Approved	-1.21126	-16.6244	-15.4132
NCGC00015704-09	Methapyrilene hydrochloride			21.8329	6.441	-15.3919
NCGC00384932-01		<MOA Unknown> | Class: Shikimate | Genus: N/A | Family: N/A | Species: N/A		-13.2602	-28.6129	-15.3528
NCGC00386244-01	IWR-1-endo			2.66199	-12.6741	-15.336
NCGC00379107-02	PhiKan083			-0.22936	-15.5383	-15.3089
NCGC00389323-02	GSK-1059615	PI3Kalpha inhibitor		-191.312	-206.574	-15.2619
NCGC00090868-05	Halothane	GABA-A receptor; anion channel Positive Allosteric Modulator		22.9449	7.73519	-15.2097
NCGC00016806-17	Mebendazole	Tubulin depolymerization Inhibitor	Approved	-185.175	-200.341	-15.1661
NCGC00346658-03	Crenolanib	PDGFR beta Inhibitor	Phase III	-127.66	-142.819	-15.159
NCGC00344519-01	Guanidine carbonate			6.88942	-8.26451	-15.1539
NCGC00250375-14	Linsitinib	IGF-1R Inhibitor	Phase III	-35.8055	-50.9456	-15.1401
NCGC00163724-03	Methidathion			-41.6179	-56.7422	-15.1243
NCGC00485451-02	Carbetocin			21.9953	6.87203	-15.1232
NCGC00381147-01		<MOA Unknown> | Class: Alkaloid | Genus: N/A | Family: N/A | Species: N/A		-2.5494	-17.6691	-15.1197
NCGC00381155-01		<MOA Unknown> | Class: shikimi | Genus: N/A | Family: N/A | Species: N/A		-31.9358	-47.0346	-15.0988
NCGC00384661-01		<MOA Unknown> | Class: Iridoid | Genus: N/A | Family: N/A | Species: N/A		-10.1098	-25.2005	-15.0906
NCGC00348110-01	PRP003-032	ACK1 Inhibitor	Biological Testing	-178.145	-193.202	-15.0576
NCGC00159509-02	Perindopril	Angiotensin-I Converting Enzyme Inhibitor	Approved	19.6254	4.57285	-15.0525
NCGC00166056-02	Ethyl nicotinate			24.9975	9.94963	-15.0479
NCGC00485232-01	Fusidic acid			15.5997	0.555434	-15.0442
NCGC00385333-01		<MOA Unknown> | Class: N/A | Genus: N/A | Family: N/A | Species: N/A		3.87996	-11.1617	-15.0417
NCGC00179885-03		<MOA Unknown> | Class: Triterpen | Genus: Ecballium | Family: N/A | Species: elaterium		-21.9958	-37.0217	-15.0259
NCGC00179704-04		<MOA Unknown> | Class: Sesquiterpen | Genus: Dittrichia | Family: Compositae | Species: viscosa		-10.925	-25.9348	-15.0098
NCGC00385849-01		<MOA Unknown> | Class: N/A | Genus: N/A | Family: N/A | Species: N/A		18.1383	3.13641	-15.0019
NCGC00384195-05	SGC OF-1	Peregrin Inhibitor		-61.5547	-76.5484	-14.9937
NCGC00480913-01	Altiratinib	HGFR Inhibitor	Phase I	-6.01915	-21.0108	-14.9916
NCGC00250399-02	Vemurafenib	Raf kinase B Inhibitor	Approved	18.5058	3.51612	-14.9897
NCGC00263468-01	L-Thioproline			-1.99599	-16.9854	-14.9894
NCGC00386738-02	ZD 9379	Glutamate [NMDA] receptor Antagonist		-19.9435	-34.9296	-14.986
NCGC00385483-01		<MOA Unknown> | Class: N/A | Genus: N/A | Family: N/A | Species: N/A		-5.40744	-20.3882	-14.9808
NCGC00386421-05	Verdinexor	Exportin-1 Antagonist	Phase I	-132.684	-147.65	-14.9655
NCGC00016523-05	Iodipamide	Complement factor B Inhibitor		17.9574	2.99989	-14.9575
NCGC00345853-03	JNJ-28312141	CSF1R (c-FMS) Inhibitor	Phase I	-58.805	-73.7572	-14.9521
NCGC00508824-01	Ralaniten (EPI-001)	Androgen Receptor Antagonist	Preclinical	-44.0858	-59.0261	-14.9403
NCGC00385335-01		<MOA Unknown> | Class: N/A | Genus: N/A | Family: N/A | Species: N/A		-9.55872	-24.4775	-14.9188
NCGC00253646-01	Agomelatine	5-HT2C Antagonist	Approved	21.5234	6.60688	-14.9165
NCGC00386321-01	Triapine	Ribonucleoside-Diphosphate Reductase Inhibitor	Phase II	-31.88	-46.7864	-14.9064
NCGC00015443-17	Flecainide acetate	Sodium Channel Protein Type 5 Subunit alpha (Nav1.5) Channel Blocker	Approved	-41.9535	-56.858	-14.9046
NCGC00370969-01	PF 998425	Androgen Receptor Antagonist		8.60729	-6.26802	-14.8753
NCGC00381434-01		<MOA Unknown> | Class: Shikimi | Genus: Piper | Family: Piperaceae | Species: capense		-45.968	-60.8431	-14.8751
NCGC00169079-02		<MOA Unknown> | Class: Iridoid | Genus: Scrophularia | Family: Scrophulariaceae | Species: frutescens		-26.0341	-40.9026	-14.8685
NCGC00390609-01	mAChR-IN-1	Muscarinic acetylcholine receptor M4 Antagonist		-29.1093	-43.9769	-14.8676
NCGC00385743-01		<MOA Unknown> | Class: Saponin | Genus: N/A | Family: N/A | Species: N/A		-73.8017	-88.6085	-14.8067
NCGC00344622-15	SGC-0946	DOT1L Inhibitor	Preclinical	-52.6666	-67.4559	-14.7893
NCGC00385575-01		<MOA Unknown> | Class: Terpenoid | Genus: N/A | Family: N/A | Species: N/A		-5.85545	-20.6369	-14.7815
NCGC00484064-01	AF-353	P2X purinoceptor 3 Antagonist		-20.3715	-35.1496	-14.7781
NCGC00016397-04	Benzydamine hydrochloride	prostaglandin production involved in inflammatory response Inhibitor		-79.527	-94.2423	-14.7153
NCGC00165863-16	PD-173074	FGFR 1/3 Inhibitor	Preclinical	-59.4806	-74.1692	-14.6886
NCGC00386151-02	Tie2 kinase inhibitor	Tie-2 kinase inhibitor		-24.7684	-39.4544	-14.686
NCGC00485335-01	Z-Leu-Leu-Glu-7-amido-4-methylcoumarin			17.4705	2.79707	-14.6734
NCGC00189144-02	UNC-0646	EHMT2 Inhibitor	Biological Testing	-96.8211	-111.494	-14.6734
NCGC00402240-03	MONNA	Anoctamin-1 Blocker		7.87247	-6.79596	-14.6684
NCGC00485021-01	PF-03246799 hydrochloride	Serotonin 2c (5-HT2c) receptor Agonist		-25.4851	-40.1525	-14.6674
NCGC00384893-01		<MOA Unknown> | Class: Saponin | Genus: N/A | Family: N/A | Species: N/A		-49.7498	-64.4084	-14.6586
NCGC00090797-28	Digoxin	Steroid	Approved	-245.619	-260.252	-14.6333
NCGC00015482-07	Gallamine triethiodide	Muscarinic M2 Antagonist	Approved	16.3649	1.73231	-14.6326
NCGC00420887-01	CPI-203	IL-6 Production Inhibitor	Preclinical	-239.796	-254.426	-14.6305
NCGC00169714-02		<MOA Unknown> | Class: Triterpen | Genus: Rubus | Family: Rosaceae | Species: idaeus		-14.4239	-29.0251	-14.6012
NCGC00262940-01	Iodoxamic Acid			11.8627	-2.73103	-14.5937
NCGC00249912-01	Floctafenine	Prostaglandin G/H synthase 2 Inhibitor		-11.4177	-26.009	-14.5913
NCGC00345854-05	CEP-33779	Jak2 Inhibitor	Preclinical	-80.1471	-94.7376	-14.5905
NCGC00091297-05	Anilinium nitrate			25.4033	10.8207	-14.5826
NCGC00261980-01	Octamylamine			0.0107348	-14.5677	-14.5784
NCGC00015554-06	ML-7	MLCK Inhibitor	Preclinical	-26.9432	-41.5064	-14.5632
NCGC00178213-05	Nafronyl oxalate	Serotonin 2 (5-HT2) receptor Antagonist		10.9308	-3.63031	-14.5611
NCGC00092358-02	1,2,3,4,5,6-Hexabromocyclohexane			18.4873	3.92923	-14.558
NCGC00253732-01	1-(2-Chloroethyl)pyrrolidine			30.9717	16.4265	-14.5452
NCGC00385602-01		<MOA Unknown> | Class: Saponin | Genus: Buddleja | Family: Loganiaceae | Species: asiatica		-47.3958	-61.94	-14.5443
NCGC00507875-01	XMD8-87	TNK2 Inhibitor	Biological Testing	-25.1918	-39.7334	-14.5416
NCGC00386426-01	TAI-1	Kinetochore protein NDC80 homolog Inhibitor		-181.693	-196.215	-14.5219
NCGC00263656-01	Ouabain	Na+/K+-ATPase Inhibitors		-291.379	-305.893	-14.5135
NCGC00386292-05	ETP46464	Serine/threonine-protein kinase mTOR Inhibitor		-111.248	-125.76	-14.5127
NCGC00370730-07	Ro 61-8048	Kynurenine 3-monooxygenase Inhibitor		-17.4215	-31.9321	-14.5106
NCGC00387265-01	SP 100030	Proto-oncogene c-JUN Inhibitor		-61.7169	-76.2178	-14.5009
NCGC00249893-01	Lodoxamide	type I hypersensitivity Inhibitor		20.3356	5.8466	-14.489
NCGC00385425-01		<MOA Unknown> | Class: N/A | Genus: N/A | Family: N/A | Species: N/A		10.1166	-4.36669	-14.4833
NCGC00510487-01	Navoximod	IDO Inhibitor	Discontinued	10.3421	-4.14067	-14.4827
NCGC00387155-01	TMPyP4 tosylate			13.1363	-1.32916	-14.4655
NCGC00380727-01		<MOA Unknown> | Class: N/A | Genus: N/A | Family: N/A | Species: N/A		-52.0728	-66.5353	-14.4625
NCGC00371157-01	AP-III-a4	Alpha enolase Inhibitor		-32.5242	-46.9769	-14.4527
NCGC00023722-16	Floxuridine	Pyrimidine Antagonist	Approved	-281.641	-296.087	-14.4465
NCGC00274083-01	Loxiglumide	Cholecystokinin A receptor Antagonist		18.7907	4.34737	-14.4434
NCGC00159472-05	Sodium 4-aminosalicylate	Dihydrofolate reductase Inhibitor		26.3412	11.8993	-14.4419
NCGC00159395-04	Phenicarbazide			21.71	7.27514	-14.4348
NCGC00381048-01		<MOA Unknown> | Class: N/A | Genus: N/A | Family: N/A | Species: N/A		-49.9959	-64.4196	-14.4237
NCGC00485285-01	Estriol 16Î±-(Î²-D-glucuronide) sodium salt			18.3638	3.94856	-14.4152
NCGC00386887-01				-29.2337	-43.5926	-14.3589
NCGC00389508-02	XL-019	Jak2 Inhibitor	Phase I	-125.667	-140.016	-14.3496
NCGC00386992-01	PF 05081090	UDP-3-O-acyl-N-acetylglucosamine deacetylase Inhibitor		-4.11021	-18.4525	-14.3423
NCGC00386234-03	CEP-32496	EGFR Inhibitor	Phase I/II	-32.0218	-46.3527	-14.3308
NCGC00485590-01	Xestospongin C	"Inositol 1,4,5-trisphosphate receptor Blocker"		-7.30323	-21.6312	-14.328
NCGC00381072-01		<MOA Unknown> | Class: Saponin | Genus: Pittosporum | Family: Pittosporaceae | Species: viridifolium		4.62546	-9.70117	-14.3266
NCGC00159339-04	Streptomycin (sulfate)	30S Ribosomal Protein Inhibitors	Approved	19.7856	5.46122	-14.3244
NCGC00169522-02	Arctiin	adipose tissue development Inhibitor		-53.0337	-67.3559	-14.3222
NCGC00380700-01		<MOA Unknown> | Class: Triterpen | Genus: Khaya | Family: Meliaceae | Species: ivorensis		-3.39177	-17.701	-14.3093
NCGC00390548-02	Exherin	N-Cadherin Antagonist	Phase II	6.59205	-7.70294	-14.295
NCGC00345082-02	KHS-101	lineage-specific differentiation enhancer	Preclinical	-82.7702	-97.0647	-14.2945
NCGC00182073-03	Nedocromil	mast cell degranulation Inhibitor		25.8102	11.573	-14.2372
NCGC00181170-02	Bendamustine	DNA Alkylating Drugs	Approved	-11.8589	-26.0889	-14.23
NCGC00247693-01	N-[1-(2-Hydroxy-2-phenylethyl)-4-piperidyl]-N-phenylpropanamide hydrochloride			-8.5316	-22.727	-14.1954
NCGC00159459-08	Mycophenolate mofetil	Inosine 5'-Monophosphate Dehydrogenase (IMPDH) Inhibitor	Approved	-181.161	-195.354	-14.1933
NCGC00015054-20	Tacrine hydrochloride	Acetylcholinesterase Inhibitor	Approved	21.8872	7.69401	-14.1932
NCGC00253602-01	Thenyldiamine			18.4571	4.26429	-14.1928
NCGC00387089-01	YM-511	Aromatase Inhibitor	Phase II	5.09437	-9.09392	-14.1883
NCGC00345832-03	SD-06	p38 MAPK Inhibitor	Phase I	2.34254	-11.837	-14.1795
NCGC00346477-02	Emricasan	Caspase Inhibitor	Phase II	-135.804	-149.979	-14.1749
NCGC00179898-02		Steroid		8.842	-5.32827	-14.1703
NCGC00094810-08	Warfarin sodium	Vitamin K Epoxide Reductase (VKER, VKOR) Inhibitor	Approved	24.2949	10.1266	-14.1684
NCGC00178860-06	Ethopropazine hydrochloride	Butyrylcholinesterase Inhibitor		18.7521	4.60735	-14.1447
NCGC00370988-01	LY 2389575 hydrochloride	Metabotropic glutamate receptor 3 Negative Allosteric Modulator		-9.41258	-23.551	-14.1384
NCGC00263131-06	PF-3845	Fatty Acid Amide Hydrolase (FAAH) Inhibitor	Preclinical	-45.2577	-59.3782	-14.1205
NCGC00016009-19	Tolazamide	ATP-sensitive inward rectifier potassium channel 1 Inhibitor		26.0107	11.8935	-14.1172
NCGC00167505-02	Eprosartan mesylate	Integrin alpha-IIb/beta-3 Inhibitor		0.524558	-13.5921	-14.1167
NCGC00167456-02	Bisibutiamine			-3.24213	-17.3551	-14.113
NCGC00015718-24	Naftopidil	alpha1-Adrenoceptor Antagonist	Approved	-5.51278	-19.6205	-14.1077
NCGC00345539-10	Dacinostat	HDAC Inhibitor	Discontinued	-230.118	-244.218	-14.0996
NCGC00507873-02	EAI045	Allosteric EGFR Inhibitor (L858R/T790M-specific)	Biological Testing	20.7247	6.65764	-14.067
NCGC00014684-04	Pifexole			15.617	1.57206	-14.045
NCGC00402265-03	VU0071063	"Sulfonylurea receptor 1, Kir6.2 Activator"		-56.5891	-70.6233	-14.0343
NCGC00017326-05	(1S,9R)-beta-Hydrastine	GABA-A receptor; anion channel Antagonist		10.59	-3.44272	-14.0327
NCGC00510480-01	YKL-05-099	Salt-inducible Kinase (SIK) Inhibitor	Preclinical	-95.1488	-109.18	-14.0309
NCGC00384617-01		<MOA Unknown> | Class: N/A | Genus: N/A | Family: N/A | Species: N/A		-7.23557	-21.2622	-14.0266
NCGC00505117-01	NCGC00505117	CBP/p300 Inhibitor	Biological Testing	-255.604	-269.628	-14.0243
NCGC00159573-02	Arcyriaflavin A			-113.76	-127.78	-14.0201
NCGC00180697-02		<MOA Unknown> | Class: Terpenoid | Genus: Ferula | Family: N/A | Species: spp		-37.1267	-51.1423	-14.0156
NCGC00384183-06	WWL113	Liver carboxylesterase 1 Inhibitor		-6.03964	-20.0449	-14.0052
NCGC00181916-01	Sulfaethoxypyridazine			25.4363	11.4317	-14.0047
NCGC00380812-02		<MOA Unknown> | Class: N/A | Genus: N/A | Family: N/A | Species: N/A		1.85719	-12.1469	-14.0041
NCGC00095088-05	Thiouracil			10.1232	-3.87791	-14.0011
NCGC00167767-13	IKK-16	IKK beta Inhibitor	Preclinical	-159.08	-173.034	-13.9547
NCGC00090986-03	4-Octylphenol			-50.1974	-64.1488	-13.9514
NCGC00346875-03	BMS-299897	g-Secretase Inhibitor	Clinical	1.7487	-12.2017	-13.9504
NCGC00387778-01	AS-252424	PI3K gamma Inhibitor	Preclinical	-20.62	-34.5627	-13.9427
NCGC00386776-01	AGN-194204	RXR Agonist	Phase II	1.98077	-11.9446	-13.9253
NCGC00485915-01	Ademetionine	S-adenosylmethionine synthase isoform type-2 Binding Agent		13.9209	0	-13.9209
NCGC00168815-02		<MOA Unknown> | Class: Saponin | Genus: Saponaria | Family: Caryophyllaceae | Species: album		-39.6317	-53.5381	-13.9064
NCGC00346692-03	CUDC-907	PI3K Inhibitor	Phase II	-285.287	-299.189	-13.902
NCGC00485333-01	Febrifugine dihydrochloride			-251.297	-265.198	-13.901
NCGC00378568-07	SKLB1002			-109.538	-123.415	-13.8772
NCGC00385603-01		<MOA Unknown> | Class: N/A | Genus: N/A | Family: N/A | Species: N/A		-6.94441	-20.8143	-13.8699
NCGC00024885-03	Olvanil			-89.8911	-103.735	-13.8435
NCGC00385347-01		<MOA Unknown> | Class: Terpenoid | Genus: N/A | Family: N/A | Species: N/A		-11.0874	-24.9259	-13.8385
NCGC00180730-03		<MOA Unknown> | Class: Terpenoid | Genus: N/A | Family: N/A | Species: N/A		-68.1864	-82.0163	-13.8299
NCGC00485920-01	Tofogliflozin (hydrate)	Sodium/glucose cotransporter 2 Inhibitor		-6.6131	-20.4426	-13.8295
NCGC00384639-01		<MOA Unknown> | Class: Amino acid | Genus: - | Family: - | Species: -		-52.6428	-66.4577	-13.8149
NCGC00347641-02		<MOA Unknown> | Class: Terpenoid | Genus: Eurycoma | Family: N/A | Species: longifolia		-24.6905	-38.4911	-13.8006
NCGC00385793-01		<MOA Unknown> | Class: N/A | Genus: N/A | Family: N/A | Species: N/A		11.8082	-1.98625	-13.7944
NCGC00386658-01	DG2	Ribosomal protein S6 kinase 1 Inhibitor		-78.6454	-92.4259	-13.7805
NCGC00381320-01		<MOA Unknown> | Class: Steroid | Genus: Mandragora | Family: Solanaceae | Species: autumnalis		-56.0849	-69.862	-13.7771
NCGC00389402-02	AZD1480	Jak1/2 inhibitor		-9.51694	-23.2923	-13.7753
NCGC00263447-01	alpha-Santonin			-42.8786	-56.6506	-13.772
NCGC00484067-01	Entrectinib	TrkA/B/C,ROS1,ALK Inhibitor	Phase II	-94.2627	-108.026	-13.7632
NCGC00270540-02	Miglitol	alpha-Glucosidase Inhibitor	Approved	19.1037	5.34589	-13.7578
NCGC00385271-01		<MOA Unknown> | Class: Shikimi | Genus: Zanthoxylum | Family: Rutaceae | Species: gilletii		2.00537	-11.7497	-13.755
NCGC00015785-10	Progesterone	Progestogen hormone	Approved	-23.4134	-37.1674	-13.754
NCGC00371073-01	CP 465022 hydrochloride	Glutamate receptor ionotropic AMPA Antagonist		-59.6076	-73.3597	-13.7522
NCGC00421826-01				19.6892	5.94392	-13.7453
NCGC00179932-02		<MOA Unknown> | Class: Terpenoid | Genus: Prunella | Family: N/A | Species: vulgaris		16.7926	3.04995	-13.7426
NCGC00179611-07	Dihydrostreptomycin sulfate	Large-conductance mechanosensitive channel Modulator		13.7347	0	-13.7347
NCGC00402268-01	A-804598	P2X purinoceptor 7 Antagonist		2.04317	-11.6735	-13.7167
NCGC00381045-01		<MOA Unknown> | Class: Saponin | Genus: N/A | Family: N/A | Species: N/A		-21.1318	-34.8473	-13.7155
NCGC00385277-01		<MOA Unknown> | Class: iridoid | Genus: Harpagophytum | Family: Pedaliaceae | Species: procumbens		-2.3653	-16.0654	-13.7001
NCGC00179341-07	Ondansetron	5-HT3 Antagonists		-104.974	-118.673	-13.6987
NCGC00485124-01	Sulindac sulfone	Phosphodiesterase 5A Inhibitor		15.766	2.07258	-13.6934
NCGC00091414-07	Salicylamide			-11.3622	-25.0553	-13.693
NCGC00390423-01	AAL-993	Vascular endothelial growth factor receptor 2 Inhibitor		-48.5304	-62.2148	-13.6844
NCGC00378688-01	Toll-like receptor modulator	Toll-like receptor 8 Modulator		-13.225	-26.9043	-13.6792
NCGC00380455-01		<MOA Unknown> | Class: Saponin | Genus: Verbascum | Family: Scrophulariaceae | Species: sinaiticum		-110.846	-124.511	-13.6647
NCGC00481611-02	ACTB-1003	FGFR Inhibitor	IND Filed	-133.698	-147.359	-13.6607
NCGC00015339-08	Dequalinium Chloride	Protein kinase C beta Inhibitor		-113.872	-127.532	-13.6604
NCGC00159456-16	Imatinib	Bcr-Abl Inhibitor	Approved	-42.1752	-55.8345	-13.6593
NCGC00018121-07	Proxyphylline	"3',5'-cyclic phosphodiesterase Inhibitor"		13.2417	-0.413634	-13.6553
NCGC00386840-01				5.77878	-7.86242	-13.6412
NCGC00016066-16	Urapidil HCl	Adrenergic receptor alpha-1 Antagonist		12.6013	-1.03003	-13.6313
NCGC00016804-03	Etofenamate	lipoxygenase pathway Inhibitor		-8.19407	-21.8231	-13.6291
NCGC00381309-01		<MOA Unknown> | Class: polyketide/shikimi; Alkaloid | Genus: N/A | Family: N/A | Species: N/A		-6.65516	-20.2828	-13.6277
NCGC00015529-22	Ibuprofen lysine	Cyclooxygenase-1/2 Inhibitor	Approved	12.7027	-0.920093	-13.6228
NCGC00380288-01		<MOA Unknown> | Class: Shikimi | Genus: Myrica | Family: Myraceae | Species: nagi		-48.1658	-61.7775	-13.6117
NCGC00263206-04	AMG-47a	Lck Kinase Inhibitor	Preclinical	-99.6208	-113.172	-13.551
NCGC00094916-06	Suprofen	Prostaglandin G/H synthase 2 Inhibitor		-14.1899	-27.7396	-13.5498
NCGC00015962-25	SB-202190	SAPK1 (JNK) Inhibitor	Preclinical	-47.1328	-60.6762	-13.5434
NCGC00380726-01		<MOA Unknown> | Class: sesquiterpene/shikimi | Genus: N/A | Family: N/A | Species: N/A		-49.0209	-62.5579	-13.537
NCGC00386202-01	Azlocillin sodium salt	Bacterial penicillin-binding protein Inhibitor		8.63785	-4.89569	-13.5335
NCGC00402371-02	GSK461364A	Serine/threonine-protein kinase PLK1 Inhibitor		-127.78	-141.303	-13.5228
NCGC00344544-01	Cabergoline	Serotonin 2b (5-HT2b) receptor Agonist		24.113	10.6145	-13.4986
NCGC00164380-01	Formestane	Aromatase Inhibitor	Approved	-28.464	-41.9618	-13.4978
NCGC00161393-04	Eticlopride hydrochloride			8.49165	-5.00554	-13.4972
NCGC00347780-02		<MOA Unknown> | Class: Terpenoid | Genus: N/A | Family: N/A | Species: N/A		-236.081	-249.567	-13.486
NCGC00346936-13	GNF-5837	Trk A/B/C Inhibitor	Preclinical	-13.7614	-27.2412	-13.4798
NCGC00159477-05	Phenylacetic acid			5.7826	-7.68788	-13.4705
NCGC00015257-18	Clofibrate	PPARalpha Agonist	Approved	16.7997	3.33406	-13.4656
NCGC00389421-01	SB590885	Serine/threonine-protein kinase B-raf Inhibitor		-77.1797	-90.6431	-13.4634
NCGC00025104-09	Ciglitizone	Peroxisome proliferator-activated receptor gamma Agonist		-2.07317	-15.52	-13.4469
NCGC00481505-01				-59.3614	-72.8081	-13.4467
NCGC00164573-02	Flurazepam	GABA-A receptor; anion channel Positive Allosteric Modulator		15.612	2.17486	-13.4371
NCGC00262909-01	Sancycline			-24.0825	-37.5036	-13.4211
NCGC00185990-04	Ketorolac	non-steroidal antiinflammatory	Approved	23.0739	9.65469	-13.4192
NCGC00347653-02		<MOA Unknown> | Class: Flavonoid | Genus: N/A | Family: N/A | Species: N/A		-102.725	-116.141	-13.4154
NCGC00346525-03	Aurora A Inhibitor I	Aurora A Inhibitor	Biological Testing	-110.476	-123.886	-13.4105
NCGC00371097-01	Zinterol hydrochloride	Beta-3 adrenergic receptor Agonist		-64.101	-77.5057	-13.4047
NCGC00384663-01		<MOA Unknown> | Class: Iridoid | Genus: Fraxinus | Family: Oleaceae | Species: excelsior		-18.7227	-32.1263	-13.4036
NCGC00016255-10	SULFINPYRAZONE			-20.7267	-34.1173	-13.3907
NCGC00023673-18	Adenosine	Adenosine Receptor Agonist	Approved	16.1591	2.77112	-13.388
NCGC00016893-04	Clorsulon	antiparasitic agent	Approved	12.6505	-0.733664	-13.3841
NCGC00386861-01				8.36767	-5.01398	-13.3816
NCGC00015478-17	GW-5074	Raf Kinase C Inhibitor	Preclinical	1.91617	-11.4628	-13.379
NCGC00387246-01	TAK 21d	Anandamide amidohydrolase Inhibitor		-7.25334	-20.6221	-13.3688
NCGC00386891-01				7.47975	-5.87855	-13.3583
NCGC00250389-02	CDIBA	Phospholipase C Inhibitor	Biological Testing	18.9573	5.60065	-13.3567
NCGC00263148-07	Abiraterone	Androgen Biosynthesis Inhibitor	Phase I	5.23844	-8.11549	-13.3539
NCGC00253620-01	1,2,3,5-Tetraacetyl-.-d-ribofuranose			20.9425	7.59042	-13.352
NCGC00390007-02				0.144509	-13.1991	-13.3436
NCGC00090766-15	Prednisone	Glucocorticoid steroid	Approved	1.16257	-12.1757	-13.3382
NCGC00263967-02	Alendronate	Protein Tyrosine Phosphatase (PTP) Inhibitor		-12.4833	-25.8198	-13.3365
NCGC00522550-01	EMD-534085	Kinesin-like Spindle Protein KIF11 (KSP; Eg5) Inhibitor	Phase I	-184.715	-198.049	-13.3349
NCGC00380467-01		<MOA Unknown> | Class: Terpenoid | Genus: N/A | Family: N/A | Species: N/A		-18.5525	-31.855	-13.3025
NCGC00179310-03	Cefalonium	Bacterial penicillin-binding protein Inhibitor		13.3854	0.0837146	-13.3017
NCGC00380250-01		<MOA Unknown> | Class: Polyketide | Genus: N/A | Family: N/A | Species: N/A		-38.3922	-51.6915	-13.2993
NCGC00385874-01		<MOA Unknown> | Class: Polyketide | Genus: N/A | Family: N/A | Species: N/A		8.35714	-4.94135	-13.2985
NCGC00261971-01	Mazaticol			-4.97053	-18.2529	-13.2824
NCGC00379073-05	SB-674042	Orexin receptor 1 Antagonist		6.55956	-6.71961	-13.2792
NCGC00345830-02	PD-173955 Analogue 1	cSRC Inhibitor	Biological Testing	1.0112	-12.2599	-13.2711
NCGC00380931-01		<MOA Unknown> | Class: diterpene | Genus: Geniculosporium | Family: N/A | Species: sp.		3.94051	-9.32505	-13.2656
NCGC00386317-10	Ribociclib (LEE011)	CDK4/6 Inhibitor	Approved	-61.6767	-74.9405	-13.2638
NCGC00380446-01		<MOA Unknown> | Class: Alkaloid | Genus: N/A | Family: N/A | Species: N/A		-19.7581	-33.0155	-13.2575
NCGC00380574-01		<MOA Unknown> | Class: Iridoid | Genus: Scrophularia | Family: Scrophulariaceae | Species: nodosa		-4.45542	-17.7108	-13.2554
NCGC00166079-02	C.I. Solvent Red 24			21.9815	8.73898	-13.2425
NCGC00091470-05	Isoeugenol	Tyrosyl-DNA phosphodiesterase 2 Inhibitor		-1.87822	-15.1091	-13.2309
NCGC00380845-01		<MOA Unknown> | Class: Triterpen | Genus: Ananas | Family: Bromeliaceae | Species: sativus		-7.87894	-21.1085	-13.2295
NCGC00263018-01	NCGC00263018-01	Brk/PTK6 inhibitor		-70.8221	-84.0351	-13.213
NCGC00024777-04	SNC 80	Delta opioid receptor Agonist		25.9316	12.7188	-13.2129
NCGC00164506-02	Tiliquinol			-33.5649	-46.7766	-13.2117
NCGC00381393-01		<MOA Unknown> | Class: Sesquiterpen | Genus: Smyrnium | Family: Umbelliferae | Species: olusatrum		2.91517	-10.2849	-13.2001
NCGC00386208-01	Equol	PC-3 Inhibitor		-33.1236	-46.3064	-13.1829
NCGC00380972-01		<MOA Unknown> | Class: N/A | Genus: N/A | Family: N/A | Species: N/A		-94.1709	-107.352	-13.1811
NCGC00263213-02	PF 184	IKK-2 (IKK-beta) Inhibitor		-91.6145	-104.79	-13.1755
NCGC00385622-01		<MOA Unknown> | Class: Sesquiterpen | Genus: Ammodaucus | Family: Umbelliferae | Species: leucotrichus		-46.0136	-59.161	-13.1474
NCGC00016229-20	Propylthiouracil	Antithyroid Drugs	Approved	6.60972	-6.53589	-13.1456
NCGC00389358-01	BIX-02188	ERK5 Inhibitor		-29.2047	-42.3459	-13.1412
NCGC00485395-01	ORM-10103	Sodium/calcium exchanger 1 Inhibitor		2.98253	-10.156	-13.1385
NCGC00161657-01		Bcr-Abl Inhibitor		-40.5441	-53.6356	-13.0915
NCGC00380798-01		Tyrosine-protein kinase SRC Inhibitor		-144.01	-157.094	-13.084
NCGC00241111-12	VX-745	p38 MAPK Inhibitor	Phase II	-40.1281	-53.2064	-13.0783
NCGC00344508-02	NPS-R568	Calcium-Sensing Receptor (CaSR) Agonist	Phase II	-29.8253	-42.8795	-13.0542
NCGC00183831-01	Aceglatone			-12.8331	-25.8829	-13.0499
NCGC00016504-09	Droperidol	HERG Inhibitor		-41.0637	-54.1046	-13.0409
NCGC00090774-12	Nitazoxanide	antiprotozoal agent	Approved	16.3432	3.31509	-13.0281
NCGC00485878-01	Nucleoside-Analog-2	NS5B Inhibitor		20.1833	7.15653	-13.0267
NCGC00181761-01	Lysozyme hydrochloride			-30.2405	-43.2507	-13.0102
NCGC00379247-02	SR 3576	c-Jun N-terminal kinase 3 Inhibitor		-44.538	-57.5247	-12.9867
NCGC00016446-11	Metronidazole	Antibiotic		-18.8543	-31.8374	-12.9831
NCGC00160613-02	Pidolic acid			-4.34541	-17.3181	-12.9727
NCGC00182052-15	SRT-1720	Histone Deacetylase/SIRT1 Activator	Preclinical	-83.8011	-96.7696	-12.9685
NCGC00386413-01	Vactosertib	ALK5 Inhibitor	Phase I/II	-5.90242	-18.8381	-12.9356
NCGC00185956-04	UNC-0224	EHMT2 Inhibitor	Biological Testing	20.5906	7.65921	-12.9313
NCGC00485422-01	PEAQX tetrasodium hydrate	Glutamate NMDA receptor; GRIN1/GRIN2A Antagonist		15.5302	2.60903	-12.9212
NCGC00385549-01		<MOA Unknown> | Class: N/A | Genus: N/A | Family: N/A | Species: N/A		1.93168	-10.9871	-12.9188
NCGC00509912-01	BLU-554	FGFR4 Inhibitor	Phase I	-13.3239	-26.2119	-12.8879
NCGC00485416-01	VUF10661	C-X-C chemokine receptor type 3 Agonist		-20.5295	-33.4024	-12.8729
NCGC00345803-05	AVN-944	Inosine 5'-Monophosphate Dehydrogenase (IMPDH) Inhibitor	Biological Testing	-217.41	-230.256	-12.8455
NCGC00347772-02		<MOA Unknown> | Class: sesterterpene | Genus: Aspergillus | Family: N/A | Species: N/A		-68.5712	-81.3901	-12.8189
NCGC00274068-01	Itraconazole	cytochrome Inhibitor	Approved	-2.33917	-15.1538	-12.8146
NCGC00248247-02	Dimethyl maleate	NFkappaB-inducing kinase Inhibitor		17.0406	4.22852	-12.8121
NCGC00385844-01		<MOA Unknown> | Class: Sesquiterpen | Genus: Sphaeranthus | Family: Compositae | Species: suaveolens		3.84794	-8.95822	-12.8062
NCGC00015950-05	SB-415286	GSK-3 beta Inhibitor	Preclinical	-37.6351	-50.4299	-12.7948
NCGC00015089-17	Amiloride hydrochloride	Epithelial Sodium Channels (ENaC) Blocker	Approved	-19.6346	-32.4248	-12.7902
NCGC00387054-01	L-732,138	Neurokinin 1 receptor Antagonist		8.55284	-4.23013	-12.783
NCGC00485490-01	NSCI	Caspase-3 Inhibitor		22.9847	10.2041	-12.7806
NCGC00242217-04	GW-843682X	Polo-like Kinase-1 (Plk-1) Inhibitor	Biological Testing	-188.917	-201.693	-12.7757
NCGC00164625-04	Cerivastatin sodium	HMG-CoA reductase Inhibitor		-200.905	-213.672	-12.7675
NCGC00378630-01	BMS-690514	VEGFR-3 Inhibitor	Phase II	-102.606	-115.372	-12.7663
NCGC00164526-02	Camylofin	Muscarinic acetylcholine receptor Antagonist		18.353	5.59026	-12.7627
NCGC00387035-02	SAR-020106	Chk1 Inhibitor	Preclinical	-155.172	-167.925	-12.7532
NCGC00380448-01		<MOA Unknown> | Class: Terpenoid | Genus: N/A | Family: N/A | Species: N/A		5.24216	-7.50098	-12.7431
NCGC00168865-02		<MOA Unknown> | Class: Terpenoid | Genus: N/A | Family: N/A | Species: N/A		-20.9132	-33.6456	-12.7324
NCGC00370779-02	VU 0364739 hydrochloride			-55.1837	-67.8865	-12.7028
NCGC00249390-02	Tivozanib	VEGFR-1/2/3 Inhibitor	Approved	-110.551	-123.253	-12.7025
NCGC00168085-26	Vorinostat (SAHA)	HDAC Inhibitor	Approved	-172.411	-185.109	-12.6981
NCGC00181026-02	Robenidine	Eimeria tenella Inhibitor		9.61813	-3.07965	-12.6978
NCGC00179265-03	Netilmicin sulfate	Lysosomal phospholipase A1 Inhibitor		25.3998	12.7038	-12.696
NCGC00015479-19	Genistein	DNA Topoisomerase II Inhibitor	Phase II	-60.5198	-73.2146	-12.6948
NCGC00378929-01	gamma-secretase modulator 3	Gamma-secretase Modulator		-88.3759	-101.066	-12.6904
NCGC00021305-16	Sirolimus	mTOR Inhibitor	Approved	-241.25	-253.93	-12.68
NCGC00180572-02		<MOA Unknown> | Class: trichothecene | Genus: Fusarium ? | Family: N/A | Species: N/A		-147.835	-160.512	-12.6773
NCGC00182547-02	Gadodiamide hydrate			23.0436	10.3849	-12.6586
NCGC00521941-01	BMS-986158	Brd4 Inhibitor	Phase I/II	-344.319	-356.977	-12.6582
NCGC00093828-06	PD-169316	p38 MAPK Inhibitor	Biological Testing	-29.7214	-42.3689	-12.6475
NCGC00181002-04	Cinacalcet hydrochloride	Calcium-Sensing Receptor (CaSR) Agonist	Approved	-46.2682	-58.9125	-12.6443
NCGC00402349-02	GN6958	Sentrin-specific protease 1 Inhibitor		-62.0049	-74.643	-12.6381
NCGC00485927-01	Pyridoclax	Induced myeloid leukemia cell differentiation protein Mcl-1 Inhibitor		22.6442	10.0172	-12.627
NCGC00025295-02	Zacopride hydrochloride	Serotonin 3a (5-HT3a) receptor Antagonist		24.7083	12.103	-12.6053
NCGC00386821-01				-52.4372	-65.0423	-12.6051
NCGC00381008-01		<MOA Unknown> | Class: Saponin | Genus: Anagallis | Family: Primulaceae | Species: monelli		-151.854	-164.457	-12.6035
NCGC00501213-01	PF-06651600	Jak3	Phase II	-1.44038	-14.037	-12.5966
NCGC00378786-01	KM 11060	Cystic fibrosis transmembrane conductance regulator Modulator		-13.6216	-26.19	-12.5685
NCGC00384543-01		<MOA Unknown> | Class: Saponin | Genus: N/A | Family: N/A | Species: N/A		-29.528	-42.0913	-12.5633
NCGC00484808-01	CPI-703	CBP/p300 Inhibitor	Biological Testing	-59.5755	-72.1327	-12.5572
NCGC00386637-01	CoPo 22	Cystic fibrosis transmembrane conductance regulator Modulator		-11.4114	-23.9599	-12.5485
NCGC00178944-03	Ampicillin			18.9067	6.35966	-12.5471
NCGC00346736-01	Testosterone cypionate	Androgen Receptor Activator	Approved	-34.9963	-47.5322	-12.5359
NCGC00346949-01	ICRF-193	DNA Topoisomerase II Inhibitor	Preclinical	-83.9549	-96.4859	-12.531
NCGC00015187-02	CGS-21680	Adenosine A2 Antagonist	Preclinical	-19.2916	-31.8154	-12.5238
NCGC00179034-15	Pentamidine isethionate	PRL Phosphatase Inhibitor	Approved	-90.4518	-102.974	-12.5226
NCGC00167521-07	Tenatoprazole	Potassium-transporting ATPase Inhibitor	Discontinued	13.7275	1.20719	-12.5203
NCGC00180814-02		<MOA Unknown> | Class: Terpenoid | Genus: N/A | Family: N/A | Species: N/A		-19.0566	-31.5756	-12.519
NCGC00013273-03	Pyridoxamine dihydrochloride	reactive oxygen species metabolic process Modulator		24.002	11.493	-12.509
NCGC00241104-09	Doramapimod	p38 MAPK Inhibitor	Phase II	5.98113	-6.52258	-12.5037
NCGC00485224-01	Î±-Zearalenol	RAW264.7 Inhibitor		-30.2942	-42.7846	-12.4904
NCGC00165778-12	CGK733	cell proliferation Inhibitor		-45.8915	-58.3817	-12.4902
NCGC00094839-04	N-Acetyl-L-glutamic acid			17.1867	4.708	-12.4787
NCGC00346684-02	AG-1024	EGFR Inhibitor	Preclinical	1.46309	-11.0093	-12.4724
NCGC00381046-01		<MOA Unknown> | Class: Triterpen | Genus: Spondianthus | Family: Anacardiaceae | Species: preussii		-20.4132	-32.8854	-12.4722
NCGC00159422-10	Tiopronin	Copper Chelator	Approved	22.1363	9.6646	-12.4717
NCGC00384979-01		<MOA Unknown> | Class: Sugar | Genus: N/A | Family: N/A | Species: N/A		13.8114	1.35293	-12.4585
NCGC00238452-03	Enzastaurin	PKCa, PKCb, PKCg inhbitor	Phase III	11.5142	-0.943162	-12.4574
NCGC00386384-04	MLN0905	Serine/threonine-protein kinase PLK1 Inhibitor		-252.818	-265.272	-12.4547
NCGC00380155-01		<MOA Unknown> | Class: N/A | Genus: N/A | Family: N/A | Species: N/A		-25.2449	-37.6874	-12.4426
NCGC00483927-02	ARV-825	Brd4 Inhibitor	Preclinical	-323.657	-336.087	-12.4307
NCGC00481552-01	Losmapimod	p38 MAPK Inhibitor	Phase II	-169.937	-182.347	-12.4093
NCGC00094908-06	Mephenesin	Glutamate NMDA receptor Antagonist		20.7744	8.37021	-12.4042
NCGC00485486-01	Nastorazepide	CCK2 (CCKB/Gastrin) Receptor Antagonist	Phase II	-15.7503	-28.1538	-12.4035
NCGC00380157-01		<MOA Unknown> | Class: Terpenoid | Genus: N/A | Family: N/A | Species: N/A		-11.4455	-23.8461	-12.4007
NCGC00188337-01				-33.6006	-45.9988	-12.3982
NCGC00015996-10	Tiapride hydrochloride	Dopamine D3 receptor Antagonist		15.2091	2.83288	-12.3762
NCGC00381144-01		<MOA Unknown> | Class: sesquiterpene | Genus: N/A | Family: N/A | Species: N/A		-56.213	-68.578	-12.365
NCGC00249907-01	Sulthiame	Carbonic anhydrase XII Inhibitor		12.3575	0	-12.3575
NCGC00387082-01	NE 100 hydrochloride	Sigma-1 receptor Antagonist		-23.8945	-36.2505	-12.356
NCGC00164593-02	Enalapril acid			-3.21412	-15.5547	-12.3406
NCGC00380804-01		<MOA Unknown> | Class: Polyketide | Genus: N/A | Family: N/A | Species: N/A		9.37777	-2.95992	-12.3377
NCGC00015949-05	SB 216763			-63.3293	-75.6669	-12.3376
NCGC00511370-01	ACY-738	HDAC Inhibitor	Preclinical	-62.3097	-74.6427	-12.333
NCGC00385732-01		<MOA Unknown> | Class: Shikimi | Genus: Hypoestes | Family: Acanthaceae | Species: verticillaris		5.99818	-6.32643	-12.3246
NCGC00185778-06	Nitisinone	4-Hydroxyphenylpyruvate Dioxygenase (4HPPD) Inhibitor	Approved	3.73188	-8.58558	-12.3175
NCGC00015766-13	Oxymetazoline hydrochloride	alpha2A(2D)-Adrenoceptor Agonist	Approved	14.5634	2.25589	-12.3075
NCGC00380712-01		<MOA Unknown> | Class: N/A | Genus: N/A | Family: N/A | Species: N/A		-12.6447	-24.9513	-12.3067
NCGC00092357-03	Sibutramine hydrochloride	5-HT Reuptake Inhibitor	Withdrawn	-1.5029	-13.8044	-12.3015
NCGC00378817-01	E 2012	Gamma-secretase Modulator		-65.0193	-77.316	-12.2967
NCGC00168879-02		<MOA Unknown> | Class: polyketide/AS; Alkaloid | Genus: ct: Alternaria | Family: N/A | Species: N/A		-3.57247	-15.8624	-12.2899
NCGC00346698-10	Vistusertib	mTORC1/2 Inhibitor	Phase II	-207.871	-220.158	-12.2878
NCGC00381051-01		<MOA Unknown> | Class: sesquiterpene/shikimi | Genus: Aspergillus ? | Family: N/A | Species: N/A		-30.9807	-43.2561	-12.2754
NCGC00390359-01	QS11	ADP-ribosylation factor GTPase activating protein 1 inhibitor	Biological Testing	-31.9824	-44.2373	-12.2549
NCGC00351476-01	TG6-129			13.2538	1.00222	-12.2516
NCGC00159406-12	Noradrenaline bitartrate monohydrate	alpha/beta-adrenoceptor Agonist	Approved	-30.5675	-42.7976	-12.2301
NCGC00385627-01		<MOA Unknown> | Class: Flavonoid | Genus: N/A | Family: N/A | Species: N/A		-86.1985	-98.4244	-12.2259
NCGC00188866-01	NCGC00188866	Rac1 Inhibitor	Biological Testing	-86.2511	-98.4749	-12.2237
NCGC00092314-04	Triciribine	AKT Inhibitor	Preclinical	-128.799	-141.015	-12.2157
NCGC00378843-02	Pirodavir	viral genome replication Inhibitor		-5.63906	-17.8514	-12.2123
NCGC00485051-01	CE-178253 benzenesulfonate salt	Cannabinoid CB1 receptor Antagonist		-38.1516	-50.363	-12.2114
NCGC00024589-06	Cimaterol	Beta-3 adrenergic receptor Agonist		23.7543	11.5446	-12.2096
NCGC00380837-01		<MOA Unknown> | Class: N/A | Genus: N/A | Family: N/A | Species: N/A		-10.5405	-22.7471	-12.2066
NCGC00485897-01	JNJ-40411813	Metabotropic glutamate receptor 2 Positive Allosteric Modulator		-49.1311	-61.3321	-12.201
NCGC00165739-02	Bohemine			-0.885987	-13.0823	-12.1963
NCGC00346827-02	7-Hydroxystaurosporine	CDK1/2/4/6	Phase II	-305.253	-317.438	-12.185
NCGC00180491-02		<MOA Unknown> | Class: nucleoside | Genus: N/A | Family: N/A | Species: N/A		18.7458	6.56092	-12.1848
NCGC00385737-01		<MOA Unknown> | Class: Saponin | Genus: N/A | Family: N/A | Species: N/A		-2.78978	-14.9699	-12.1802
NCGC00161418-13	JTC-801	ORL1 (OP4, NOP) Antagonist	Discontinued	-99.6949	-111.867	-12.1722
NCGC00262929-01	BIBR-1048	Thrombin Inhibitor	Approved	-12.7344	-24.8938	-12.1594
NCGC00485671-01	TAPI-2 acetate salt	ADAM17 Inhibitor		-31.3456	-43.4935	-12.1479
NCGC00485982-01	Ginsenoside Rb3	cell proliferation Inhibitor		18.3102	6.16736	-12.1428
NCGC00183860-01	Mefruside	Carbonic anhydrase Inhibitor		10.056	-2.05667	-12.1127
NCGC00015478-09	GW-5074	Raf Kinase C Inhibitor	Preclinical	1.98091	-10.1261	-12.107
NCGC00384765-01		<MOA Unknown> | Class: Terpenoid | Genus: N/A | Family: N/A | Species: N/A		12.2577	0.153922	-12.1038
NCGC00507861-01	FRAX-1036	p21-Activated Kinase 1/2 (PAK1/2) Inhibitor	Preclinical	-105.182	-117.284	-12.1025
NCGC00390637-02	AZD2932	Vascular endothelial growth factor receptor 2 Inhibitor		-42.6286	-54.7249	-12.0964
NCGC00021274-05	Estradiol Benzoate			-20.0277	-32.1177	-12.09
NCGC00163510-01	Aloe-emodin	Caspase 3 Activator	Preclinical	13.2477	1.17198	-12.0757
NCGC00262641-04	S31-201	STAT-3 Inhibitor	Preclinical	7.90987	-4.15732	-12.0672
NCGC00274030-11	Infigratinib	FGFR3 Inhibitor	Phase II	-44.388	-56.4536	-12.0657
NCGC00379029-01	Bitopertin	Glycine transporter 1 Inhibitor		-10.1017	-22.1632	-12.0615
NCGC00347379-02		<MOA Unknown> | Class: Saponin | Genus: Aesculus | Family: Hippocastanaceae | Species: sp.		-94.1468	-106.201	-12.0538
NCGC00384664-01		<MOA Unknown> | Class: macrolide | Genus: N/A | Family: N/A | Species: N/A		-128.911	-140.964	-12.0532
NCGC00016529-07	Pramoxine hydrochloride	Sodium channel alpha subunit Antagonist		-19.2587	-31.3079	-12.0492
NCGC00183784-18	IOX-1	Lysine-Specific Demethylase 4A (KDM4A; JMJD2A) Inhibitor	Biological Testing	-14.6544	-26.6991	-12.0447
NCGC00095227-06	Alizarin	Calcium Binding Agent		6.17487	-5.86725	-12.0421
NCGC00389632-06	Tipiracil	Thymidine Phosphorylase Inhibitor	Phase I	23.2606	11.2266	-12.034
NCGC00402289-04	LDN-192960 DIHYDROCHLORIDE			-8.78767	-20.8133	-12.0256
NCGC00181915-02	Mepranoprofen arbamel			-0.0653441	-12.0642	-11.9988
NCGC00408890-01	Palosuran	Urotensin II receptor Antagonist		11.0769	-0.919974	-11.9969
NCGC00263158-07	Amuvatinib	PDGFR alpha Inhibitor	Discontinued	-54.7542	-66.7494	-11.9951
NCGC00485570-01	I-AB-MECA	Adenosine A3 receptor Agonist		7.11997	-4.87227	-11.9922
NCGC00385160-01		<MOA Unknown> | Class: Sugar | Genus: N/A | Family: N/A | Species: N/A		13.5466	1.55491	-11.9917
NCGC00016438-04	Procarbazine hydrochloride	DNA Alkylating Drugs	Approved	9.96585	-2.01162	-11.9775
NCGC00347904-03	AZ-11645373	P2X7 Receptor Antagonist	Biological Testing	-88.3281	-100.3	-11.9716
NCGC00159455-14	Gefitinib	EGFR Inhibitor	Approved	-48.2493	-60.2208	-11.9716
NCGC00164622-02	Voriconazole	Lanosterol 14alpha-demethylase Inhibitor	Approved	18.0197	6.04968	-11.97
NCGC00165727-10	AKT Inhibitor VIII	AKT Inhibitor	Preclinical	-83.2236	-95.1885	-11.9648
NCGC00015599-10	L-165041	PPARdelta Agonist	Preclinical	8.56568	-3.39369	-11.9594
NCGC00385407-01		<MOA Unknown> | Class: alkaloid | Genus: Penicillium ? | Family: N/A | Species: N/A		13.2349	1.27565	-11.9593
NCGC00384687-01		<MOA Unknown> | Class: Triterpen | Genus: Rhamnus | Family: Rhamnaceae | Species: lyciodes		2.88936	-9.05549	-11.9449
NCGC00093351-06	Cefoxitin	Penicillin-binding protein 2B Inhibitor		25.7241	13.8044	-11.9197
NCGC00021147-11	Doxylamine succinate	Histamine H1 receptor Antagonist		17.7178	5.8017	-11.9161
NCGC00387187-01	BTT 3033	Integrin alpha2/beta1 Binding Agent		-73.2874	-85.1889	-11.9015
NCGC00346482-01	Mesna disulfide	chemoprotective agent	Phase III	19.2119	7.31461	-11.8973
NCGC00385168-01		inflammatory response Inhibitor		0.710459	-11.1857	-11.8962
NCGC00485482-01	CB1-IN-1	Cannabinoid receptor 1 Inverse Agonist		16.5748	4.67915	-11.8957
NCGC00253689-01	Propacetamol	Cyclooxygenase-2 Inhibitor		11.8933	0.00833141	-11.885
NCGC00261897-01	NU-6027	ATR Kinase Inhibitor	Biological Testing	-47.4915	-59.3685	-11.877
NCGC00346492-09	XL-147	PI3K Inhibitor	Phase I	-57.7783	-69.6445	-11.8662
NCGC00090797-15	Digoxin	Steroid	Approved	-293.588	-305.451	-11.8627
NCGC00180494-03		<MOA Unknown> | Class: Saponin | Genus: Saponaria | Family: Caryophyllaceae | Species: album		4.64234	-7.21935	-11.8617
NCGC00386313-07	Berzosertib	ATR Kinase Inhibitor	Phase II	-203.813	-215.655	-11.842
NCGC00022391-05	6-Azaribine			-181.487	-193.326	-11.8393
NCGC00273564-01	Bropirimine	Toll-like receptor 7 Agonist		8.9078	-2.93005	-11.8378
NCGC00485401-01	LY-354740 hydrate	Metabotropic glutamate receptor 3 Agonist		18.8334	7.00445	-11.8289
NCGC00378905-04	NSC 42834			11.8129	0	-11.8129
NCGC00263694-09	Kartogenin	chondrocyte differentiation initiator	Preclinical	-16.5813	-28.3714	-11.7901
NCGC00180503-03		<MOA Unknown> | Class: sesquiterpene/shikimi; Alkaloid | Genus: N/A | Family: N/A | Species: N/A		11.7858	0	-11.7858
NCGC00179743-02		<MOA Unknown> | Class: Triterpen | Genus: Ochrosia | Family: Apocynaceae | Species: borbonica		17.2496	5.47136	-11.7782
NCGC00384274-01	Indirubin_E8			-122.879	-134.657	-11.7779
NCGC00015437-22	Fenofibrate	PPARalpha Agonist	Approved	-2.43982	-14.2167	-11.7768
NCGC00381177-01		<MOA Unknown> | Class: N/A | Genus: N/A | Family: N/A | Species: N/A		-3.00429	-14.7794	-11.7751
NCGC00015713-13	Nitrendipine	Intermediate conductance calcium-activated potassium channel protein 4 Inhibitor		-11.2527	-23.0251	-11.7724
NCGC00016260-13	Ethacrynic acid	Sodium/potassium-transporting ATPase subunit alpha-1 Inhibitor		-35.279	-47.0502	-11.7711
NCGC00016925-11	Omeprazole	ABCC3 Expression Enhancer	Approved	8.91179	-2.84102	-11.7528
NCGC00186653-01	Fluoperazine dihydrochloride	Nav1.4 (SkM1) Sodium Channel Blockers;Nav1.7 (PN1/hNE-Na) Sodium Channel Blockers		-41.4389	-53.1877	-11.7488
NCGC00380688-01		<MOA Unknown> | Class: Polyketide | Genus: N/A | Family: N/A | Species: N/A		-11.112	-22.857	-11.745
NCGC00182047-04	Fludarabine phosphate	Purine Antagonist	Approved	-124.135	-135.852	-11.7165
NCGC00182037-01	Alacepril	Angiotensin-I Converting Enzyme Inhibitor	Approved	-65.5805	-77.2948	-11.7143
NCGC00161643-05	Fluorescein sodium			-22.1553	-33.8693	-11.714
NCGC00179705-03		<MOA Unknown> | Class: Alkaloid | Genus: Acacia | Family: Mimosaceae | Species: ataxacantha		-28.4463	-40.1469	-11.7005
NCGC00485985-01	Alarelin (Acetate)	Progonadoliberin-1 Agonist		19.2321	7.53783	-11.6943
NCGC00390566-03	CWHM-12	Integrin alpha-V/beta-6 Inhibitor		-1.40088	-13.0853	-11.6844
NCGC00022612-11	Cefaclor	Cephalosporin antibiotic		14.8137	3.13888	-11.6749
NCGC00261974-01	Metamfepramone			-12.44	-24.1104	-11.6704
NCGC00015838-06	Propionylpromazine hydrochloride	Trypanothione reductase Inhibitor		-21.9955	-33.6444	-11.6489
NCGC00485645-01	CHIC-35	NAD-dependent deacetylase sirtuin 1 Inhibitor		0.150466	-11.4931	-11.6436
NCGC00253683-01	Ethyl 7-chloro-2-oxoheptanoate			14.8744	3.25133	-11.6231
NCGC00347623-02		<MOA Unknown> | Class: Terpenoid | Genus: N/A | Family: N/A | Species: N/A		-177.239	-188.852	-11.6128
NCGC00249390-05	Tivozanib	VEGFR-1/2/3 Inhibitor	Approved	-113.188	-124.801	-11.6127
NCGC00345056-07	Vidofludimus	DHODH Inhibitor	Phase II	-71.2688	-82.866	-11.5972
NCGC00510528-01	MT-DADMe-ImmA	Inhibitor of MTAP	Biological Testing	-14.3556	-25.9441	-11.5885
NCGC00380928-01		<MOA Unknown> | Class: Polyketide | Genus: N/A | Family: N/A | Species: N/A		-10.5868	-22.1701	-11.5832
NCGC00183835-01	Cloforex			18.0972	6.51497	-11.5822
NCGC00179542-03	Brinzolamide	Carbonic anhydrase II Inhibitor		17.0416	5.45997	-11.5816
NCGC00378878-03	Lucitanib	CSF1R (c-FMS) Inhibitor	Phase II	-39.4205	-50.9934	-11.5729
NCGC00402322-04	INDY			-41.6611	-53.2328	-11.5716
NCGC00522516-01	MIR96-IN-1	microRNA-96 Inhibitor	Biological Testing	-68.1203	-79.6864	-11.5661
NCGC00179602-03	Testosterone propionate	Androgen Receptor Agonist		-46.7103	-58.2544	-11.544
NCGC00015983-04	Trifluperidol hydrochloride			-22.1077	-33.6517	-11.5439
NCGC00386903-01				-3.0732	-14.6128	-11.5396
NCGC00018261-06	Perhexiline	mitochondrial carnitine palmitoyltransferase-1 inhbitior	Approved	-49.4629	-60.9931	-11.5302
NCGC00346568-05	GSK-1292263A	Glucose-Dependent Insulinotropic Receptor (GDIR, GPR119) Agonist	Phase II	-12.0478	-23.572	-11.5242
NCGC00351596-09	AZD-3463	ALK Inhibitor	Preclinical	-118.972	-130.494	-11.5219
NCGC00385464-01		<MOA Unknown> | Class: Terpenoid | Genus: N/A | Family: N/A | Species: N/A		5.56959	-5.94979	-11.5194
NCGC00180676-03		<MOA Unknown> | Class: Diterpen | Genus: Cistus | Family: Cistaceae | Species: ladanifer		2.36415	-9.15293	-11.5171
NCGC00379158-01	IQ 3			-31.4716	-42.9787	-11.5072
NCGC00094852-03	Levothyroxine	synthetic hormone		15.4088	3.90421	-11.5046
NCGC00013895-08	Benzbromarone	Xanthine dehydrogenase Inhibitor		-21.8248	-33.3273	-11.5025
NCGC00485396-01	PF-04701475	"Glutamate receptor ionotropic, AMPA Positive Allosteric Modulator"		-37.5285	-49.0269	-11.4984
NCGC00384199-05	4SC-202	HDAC Inhibitor	Phase I/II	-159.291	-170.767	-11.4754
NCGC00385891-01		<MOA Unknown> | Class: Tannin | Genus: N/A | Family: N/A | Species: N/A		5.15868	-6.31587	-11.4746
NCGC00510232-02	LXS-196	PKC-alpha, PKC-theta Inhibitor	Phase I	-41.2138	-52.6834	-11.4695
NCGC00378683-01	WAY 213613	Excitatory amino acid transporter 3 Inhibitor		-73.0855	-84.5468	-11.4614
NCGC00346939-07	PF-8380	Phosphodiesterase II (ENPP2; Autotaxin) Inhibitor	Preclinical	-12.9653	-24.4231	-11.4578
NCGC00094815-05	Broxyquinoline			-84.3633	-95.8113	-11.4481
NCGC00385457-01		<MOA Unknown> | Class: Alkaloid | Genus: N/A | Family: N/A | Species: N/A		-8.76095	-20.1999	-11.439
NCGC00263180-08	Trametinib	Mek 1/2 Inhibitor	Approved	-69.4772	-80.9082	-11.431
NCGC00183862-01	Tolrestat	Aldose Reductase Inhibitor	Withdrawn	10.043	-1.38508	-11.4281
NCGC00346640-05	SNX-5422	Heat Shock Protein 90 (hsp90) Inhibitor	Phase I/II	-240.718	-252.145	-11.4268
NCGC00355875-04	GSK-2837808A	LDHA Inhibitor	Biological Testing	17.2336	5.82392	-11.4097
NCGC00485089-01	PF-04455242 hydrochloride	Kappa opioid receptor Antagonist		-40.4926	-51.8978	-11.4052
NCGC00346674-02	Onalespib	Heat Shock Protein 90 (hsp90) Inhibitor	Phase I	-209.34	-220.739	-11.399
NCGC00346622-03	Fostamatinib	Syk Kinase Inhibitor	Approved	-114.715	-126.113	-11.3981
NCGC00165865-03	Penfluridol	Dopamine receptor Blocker		-92.3133	-103.706	-11.3927
NCGC00015726-11	Nialamide			-0.840186	-12.2302	-11.39
NCGC00347709-02		<MOA Unknown> | Class: Shikimate | Genus: N/A | Family: N/A | Species: N/A		-29.5016	-40.8793	-11.3776
NCGC00253634-01	1-(4-Chlorobenzenesulfonyl)urea			-23.46	-34.8354	-11.3753
NCGC00385280-01		<MOA Unknown> | Class: Polyketide | Genus: N/A | Family: N/A | Species: N/A		-21.7693	-33.1319	-11.3626
NCGC00159533-02	Eltoprazine hydrochloride			-10.5738	-21.9316	-11.3577
NCGC00163269-02	MDL29951	"Fructose-1,6-bisphosphatase Inhibitor"		14.0587	2.70376	-11.355
NCGC00386535-01	WAY 100135 dihydrochloride	Serotonin 1d (5-HT1d) receptor Partial Agonist		10.0845	-1.2507	-11.3352
NCGC00485853-01	Aib-1 trifluoroacetate salt	amyloid fibril formation Inhibitor		-15.7114	-27.0364	-11.325
NCGC00344555-01	Proscillaridin	Steroid	Approved	-351.411	-362.718	-11.3066
NCGC00492447-02	ARS-853	KRAS (G12C) Inhibitor	Biological Testing	-13.9142	-25.217	-11.3028
NCGC00024427-05	Naltrexone hydrochloride	mu-Opioid Antagonist	Approved	21.9638	10.6656	-11.2982
NCGC00385862-01		<MOA Unknown> | Class: N/A | Genus: N/A | Family: N/A | Species: N/A		7.38507	-3.90961	-11.2947
NCGC00253692-01	Ambasilide	sodium ion transport Inhibitor		18.5825	7.29119	-11.2913
NCGC00181098-02	Nelarabine	Purine Antagonist	Approved	-85.4397	-96.7309	-11.2912
NCGC00016850-15	Bezafibrate	Peroxisome proliferator-activated receptor gamma Agonist		15.8189	4.53348	-11.2855
NCGC00179903-03	6-HYDROXYFLAVONE			-20.5553	-31.8373	-11.2821
NCGC00378902-02	Toceranib	VEGFR Inhibitor	Preclinical	-70.2874	-81.5684	-11.281
NCGC00510699-01	GSK9311	BRPF1 bromodomain Inhibitor	Biological Testing	4.76812	-6.50723	-11.2753
NCGC00253674-01	Fluoroquinolonic acid			11.2575	0	-11.2575
NCGC00379188-02	ML 204			22.5917	11.3445	-11.2471
NCGC00018243-09	Sulfamethazine	Bacterial dihydropteroate synthase Inhibitor		20.5005	9.25544	-11.2451
NCGC00347404-02		<MOA Unknown> | Class: Polyketide | Genus: N/A | Family: N/A | Species: N/A		-6.18278	-17.4269	-11.2442
NCGC00253587-01	Sitaxentan	Endothelin ETA Receptor Antagonist	Withdrawn	4.58433	-6.65929	-11.2436
NCGC00253630-01	10,11-Dihydro-5H-dibenz[b,f]azepine			11.9662	0.724321	-11.2419
NCGC00015558-14	Isoprenaline hydrochloride	beta-Adrenoceptor Agonist	Approved	8.77162	-2.46408	-11.2357
NCGC00384778-01		<MOA Unknown> | Class: Terpenoid | Genus: N/A | Family: N/A | Species: N/A		-56.1607	-67.3652	-11.2045
NCGC00492474-01	Compound 22d	CKs1-SKp2 protein-protein Inhibitor	Biological Testing	-66.0917	-77.2931	-11.2014
NCGC00346972-08	PF-543	Sphingosine Kinase 1 (SphK1) Inhibitor	Preclinical	-60.2918	-71.4867	-11.1949
NCGC00274084-01	DL-Isoleucine			18.682	7.49615	-11.1858
NCGC00169906-03		<MOA Unknown> | Class: Diterpen | Genus: Azadirachta | Family: Meliaceae | Species: indica		-3.61857	-14.8028	-11.1842
NCGC00347588-02		<MOA Unknown> | Class: Shikimate | Genus: N/A | Family: N/A | Species: N/A		-27.1715	-38.3411	-11.1696
NCGC00345085-02	(-)-Indolactam V	lineage-specific differentiation enhancer	Biological Testing	-107.266	-118.434	-11.168
NCGC00017285-06		<MOA Unknown> | Class: Alkaloid | Genus: N/A | Family: N/A | Species: N/A		-42.7791	-53.9322	-11.1531
NCGC00345816-01	GM-1489	MMP Inhibitor	Biological Testing	9.89729	-1.25362	-11.1509
NCGC00384854-01		Sodium/potassium-transporting ATPase Inhibitor		-105.454	-116.596	-11.1421
NCGC00169192-02		<MOA Unknown> | Class: Alkaloid | Genus: Fusarium | Family: N/A | Species: N/A		-51.4236	-62.5496	-11.126
NCGC00016660-06	Felbinac	Prostaglandin G/H synthase 2 Inhibitor		7.56048	-3.55498	-11.1155
NCGC00015542-07	Ibudilast	Phosphodiesterase 4A Inhibitor		16.8012	5.68615	-11.115
NCGC00385871-01		<MOA Unknown> | Class: Terpenoid | Genus: N/A | Family: N/A | Species: N/A		-50.7888	-61.9034	-11.1146
NCGC00390409-01	Compound112254			-24.8229	-35.9366	-11.1137
NCGC00387189-01	AL-8697	p38 MAPK Inhibitor	Biological Testing	-56.0838	-67.1971	-11.1133
NCGC00016000-18	Disulfiram	Aldehyde Dehydrogenase (ALDH2) Inhibitor	Approved	-86.2131	-97.3255	-11.1124
NCGC00169963-02		<MOA Unknown> | Class: Terpenoid | Genus: Juniperus | Family: N/A | Species: spp		16.0368	4.93223	-11.1046
NCGC00178913-11	Tripterin	Heat Shock Protein 90 (hsp90) Inhibitor	Preclinical	-123.077	-134.173	-11.0969
NCGC00389795-01	CAY10505	PI3K gamma Inhibitor	Preclinical	9.02027	-2.07	-11.0903
NCGC00356072-01	N/A	Lysine-specific histone demethylase 1 Inhibitor		2.20986	-8.87567	-11.0855
NCGC00385304-01	Atractylenolide III	<MOA Unknown> | Class: N/A | Genus: N/A | Family: N/A | Species: N/A		11.7836	0.701582	-11.0821
NCGC00169916-02		<MOA Unknown> | Class: Terpenoid | Genus: Fusarium | Family: N/A | Species: N/A		-3.32895	-14.3948	-11.0659
NCGC00024257-10	Phenylephrine hydrochloride	alpha1-Adrenoceptor Agonist	Approved	7.29179	-3.77177	-11.0636
NCGC00485277-01	6-B345TTQ			3.00259	-8.06091	-11.0635
NCGC00390385-01	PonasteroneA	Ecdysone receptor Activator		4.16902	-6.88997	-11.059
NCGC00263230-01	FASN MRK	Fatty Acid Synthase (FAS) Inhibitor	Biological Testing	14.264	3.21531	-11.0487
NCGC00242493-09	Quizartinib	Flt3 Inhibitor	Phase III	-7.73828	-18.7549	-11.0166
NCGC00091455-09	Celecoxib	Cyclooxygenase-2 Inhibitor	Approved	-5.51022	-16.5268	-11.0165
NCGC00390716-02	RG7090 (CTEP Derive)	Metabotropic glutamate receptor 5 Negative Allosteric Modulator		-44.4254	-55.432	-11.0066
NCGC00386400-04	GLPG0634			-65.1716	-76.1728	-11.0012
NCGC00485485-01	Ca2+ channel agonist 1	Cyclin-dependent kinase 2/cyclin A Inhibitor		-12.2612	-23.2605	-10.9993
NCGC00185969-01				-28.0239	-39.0152	-10.9914
NCGC00385287-01		<MOA Unknown> | Class: Diterpen | Genus: Andrographis | Family: Acanthaseae | Species: paniculata		-24.2882	-35.2759	-10.9877
NCGC00380715-01		<MOA Unknown> | Class: Terpenoid | Genus: N/A | Family: N/A | Species: N/A		-109.887	-120.865	-10.9774
NCGC00385368-01		<MOA Unknown> | Class: aromatic polyketide | Genus: N/A | Family: N/A | Species: N/A		-0.860179	-11.8344	-10.9743
NCGC00263222-02	CAY-10581	IDO Inhibitor	Biological Testing	-61.4695	-72.4411	-10.9715
NCGC00385078-01		<MOA Unknown> | Class: Shikimate | Genus: N/A | Family: N/A | Species: N/A		-76.6619	-87.6288	-10.9669
NCGC00017312-04	Uridine	Anti-anxiety drug	Approved	-2.19602	-13.1528	-10.9568
NCGC00380426-01		<MOA Unknown> | Class: Diterpen | Genus: Elaeoselinum | Family: Apiaceae | Species: foetidum		-4.23038	-15.1658	-10.9355
NCGC00378614-01	Flumatinib mesylate	Bcr-Abl Inhibitor	Phase III	-74.592	-85.5186	-10.9265
NCGC00159437-03	Clobutinol hydrochloride	HERG Inhibitor		16.0213	5.09575	-10.9256
NCGC00167454-02	Pilsicainide	Sodium channel alpha subunit Blocker		3.92422	-6.99119	-10.9154
NCGC00508859-01	NAMPT-IN-1	NAMPT Inhibitor	Biological Testing	-289.368	-300.268	-10.9002
NCGC00159483-04	Hydroxychloroquine sulfate	Autophagy Inhibitor	Approved	16.959	6.06638	-10.8927
NCGC00346634-03	WAY-600	mTOR Inhibitor	Preclinical	-140.323	-151.213	-10.89
NCGC00385241-01		<MOA Unknown> | Class: Saponin | Genus: N/A | Family: N/A | Species: N/A		-22.6249	-33.5129	-10.8881
NCGC00025177-08	Suramin	P2 receptor antagonist; ryanodine receptor agonist; Fibroblast Growth Factor (FGF) Inhibitors		21.6366	10.7518	-10.8847
NCGC00386914-01				-31.6938	-42.5716	-10.8777
NCGC00017388-05	(+)-Usniacin	adrenergenic receptor antagaonist		1.97114	-8.89283	-10.864
NCGC00263576-01	Gonadorelin hydrochloride			-23.1341	-33.9915	-10.8575
NCGC00016547-08	Clofibric acid			15.7644	4.91589	-10.8486
NCGC00016049-07	Tetracaine hydrochloride	Sodium channel alpha subunit Blocker		18.3976	7.55399	-10.8436
NCGC00346535-02	IVX-214	Polo-like Kinase-1 (Plk-1) Inhibitor	Phase I	-153.97	-164.813	-10.8431
NCGC00385481-01		<MOA Unknown> | Class: Diterpen | Genus: Andrographis | Family: Acanthaceae | Species: paniculata		-25.4774	-36.3099	-10.8325
NCGC00178432-05	Yohimbic acid monohydrate			18.2561	7.43043	-10.8257
NCGC00386387-02	Buclizine HCl	Histamine H1 receptor Antagonist		-4.3066	-15.1139	-10.8073
NCGC00510235-01	H3B-6527			-4.95318	-15.7493	-10.7962
NCGC00159515-03	Eszopiclone	GABAA Receptor Modulator		14.4695	3.68111	-10.7884
NCGC00025035-05	SB-203580	p38 MAPK Inhibitor	Preclinical	-52.3468	-63.1284	-10.7816
NCGC00161601-02	Sulindac sulfide			12.4757	1.69425	-10.7815
NCGC00496839-01	ON-123300	RET Inhibitor	Preclinical	-180.274	-191.036	-10.7625
NCGC00183858-01	Blonanserin	Serotonin 2a (5-HT2a) receptor Antagonist		16.2154	5.4556	-10.7598
NCGC00371010-02	RP 001 hydrochloride	Sphingosine 1-phosphate receptor Edg-1 Agonist		2.84907	-7.89345	-10.7425
NCGC00390601-01	LPA2 antagonist 1	Lysophosphatidic acid receptor Edg-4 Antagonist		-96.1369	-106.875	-10.7384
NCGC00016103-16	Lificiguat	HIF-1alpha Inhibitor	Preclinical	-94.2587	-104.994	-10.735
NCGC00379098-01	TCN 237 dihydrochloride	"Glutamate receptor ionotropic, NMDA 2B Antagonist"		-20.2977	-31.0236	-10.7259
NCGC00476037-01	Perifosine	Serine/threonine-protein kinase AKT Inhibitor	Phase II	15.5682	4.85831	-10.7099
NCGC00181756-01	gamma-Oryzanol	lipid oxidation Inhibitor		-11.4352	-22.1427	-10.7075
NCGC00017257-14	Metergoline			-23.6167	-34.3034	-10.6866
NCGC00402317-01	AG-1557	Epidermal growth factor receptor erbB1 Inhibitor		-63.8731	-74.5513	-10.6782
NCGC00386366-01	INCB024360	"Indoleamine 2,3-dioxygenase Inhibitor"		4.70433	-5.97306	-10.6774
NCGC00384624-01		<MOA Unknown> | Class: Saponin | Genus: N/A | Family: N/A | Species: N/A		-2.68336	-13.3509	-10.6676
NCGC00263532-10	Olopatadine hydrochloride	Mediator Release Inhibitor	Approved	13.6842	3.0247	-10.6595
NCGC00356145-10	CB-839	Glutaminase Inhibitor	Phase II	-32.2624	-42.9217	-10.6593
NCGC00346672-02	ARRY-380	HER2 Inhibitor	Biological Testing	-78.9269	-89.5742	-10.6473
NCGC00485399-01	PF-04991532	Hexokinase type IV Activator		6.99688	-3.64555	-10.6424
NCGC00263092-02	Apratastat	TNF-alpha-Converting Enzyme Inhibitor	Phase II	-28.7531	-39.374	-10.6209
NCGC00188476-02				-4.20669	-14.8183	-10.6116
NCGC00346700-13	A-803467	Nav1.8 (SNS/PN3) Sodium Channel Blocker	Preclinical	6.24109	-4.35659	-10.5977
NCGC00015234-19	Carbamazepine	Sodium channel protein type 5 subunit alpha Blocker		16.7756	6.17801	-10.5976
NCGC00165736-13	Acadesine	AMPK Activator	Phase I/II	10.8046	0.213252	-10.5914
NCGC00481574-01	GSK-503	EZH2 Inhibitor	Preclinical	-30.8134	-41.4032	-10.5898
NCGC00385485-01		<MOA Unknown> | Class: N/A | Genus: N/A | Family: N/A | Species: N/A		-34.7791	-45.3559	-10.5768
NCGC00015727-10	Nomifensine maleate	serotonin uptake Inhibitor		12.7908	2.21428	-10.5765
NCGC00180662-03		<MOA Unknown> | Class: Terpenoid | Genus: Chiliotrichium | Family: N/A | Species: rosmarinifolium		-27.7964	-38.3728	-10.5764
NCGC00016613-10	Antazoline hydrochloride	Histamine H1 receptor Antagonist		21.1186	10.5468	-10.5718
NCGC00378622-10	Osimertinib mesylate	EGFR (Thr790Met Mutant) Inhibitor	Approved	-104.221	-114.79	-10.5686
NCGC00384629-01		<MOA Unknown> | Class: Sugar | Genus: N/A | Family: N/A | Species: N/A		7.89881	-2.66976	-10.5686
NCGC00380668-01		<MOA Unknown> | Class: saponine | Genus: N/A | Family: N/A | Species: N/A		13.2081	2.66036	-10.5477
NCGC00247665-04	Anagrelide hydrochloride	Phosphodiesterase III (PDE3) inhibitor		26.7946	16.2497	-10.5449
NCGC00385693-01		<MOA Unknown> | Class: N/A | Genus: N/A | Family: N/A | Species: N/A		8.75228	-1.78293	-10.5352
NCGC00161422-09	BIBX 1382	Epidermal growth factor receptor Inhibitor		-23.6025	-34.1364	-10.5338
NCGC00263218-08	Teriflunomide	DHODH Inhibitor	Approved	-7.41989	-17.9417	-10.5218
NCGC00346884-02	Eeyarestatin I	Inhibitor of endoplasmic reticulum associated protein degradation	Biological Testing	-65.1323	-75.6507	-10.5184
NCGC00402290-03	LDN-211904 Oxalate	Ephrin type-B receptor 3 Inhibitor		-102.971	-113.489	-10.5179
NCGC00015209-16	Cyclophosphamide	Bcl-2 Expression Inhibitor	Approved	9.78678	-0.728868	-10.5156
NCGC00345856-01	AZD-26	AKT Inhibitor	Biological Testing	-74.7218	-85.2333	-10.5116
NCGC00384683-01		Steroid		-85.916	-96.4254	-10.5093
NCGC00386081-01		<MOA Unknown> | Class: N/A | Genus: N/A | Family: N/A | Species: N/A		12.7241	2.23761	-10.4865
NCGC00389704-01	A922500	Diacylglycerol Acyltransferase Type 1 (DGAT-1) Inhibitors		17.0656	6.58557	-10.48
NCGC00347423-03		Sodium/potassium-transporting ATPase Inhibitor		-129.211	-139.686	-10.4746
NCGC00487123-01	SYUIQ-5			-152.14	-162.602	-10.4613
NCGC00386433-04	CH-5183284	FGFR 1/2/3 Inhibitor	Phase I/II	-77.3235	-87.7837	-10.4602
NCGC00167472-10	Amlexanox	Mediator Release Inhibitor	Approved	13.0619	2.60262	-10.4593
NCGC00179701-03		<MOA Unknown> | Class: Terpenoid | Genus: N/A | Family: N/A | Species: N/A		-71.2029	-81.6546	-10.4517
NCGC00385520-01		<MOA Unknown> | Class: Terpenoid | Genus: N/A | Family: N/A | Species: N/A		13.3461	2.89552	-10.4506
NCGC00274056-01	Risedronate sodium	Farnesyl diphosphate synthase Inhibitor	Approved	16.1329	5.68259	-10.4503
NCGC00380512-01		<MOA Unknown> | Class: Terpenoid | Genus: N/A | Family: N/A | Species: N/A		-36.7322	-47.1806	-10.4483
NCGC00385611-01		<MOA Unknown> | Class: Diterpen | Genus: Pinus | Family: Pinaceae | Species: nigra nigra		-23.2292	-33.6648	-10.4356
NCGC00018242-07	Sulfacetamide	Bacterial dihydropteroate synthase Inhibitor		14.2731	3.84002	-10.4331
NCGC00014670-26	Domperidone	Dopamine Receptor Antagonist	Approved	-7.15708	-17.589	-10.4319
NCGC00180043-02		<MOA Unknown> | Class: alkaloid | Genus: N/A | Family: N/A | Species: N/A		-15.0287	-25.4441	-10.4154
NCGC00165782-07	GW-4869	Neutral Sphingomyelinase (N-SMase) Inhibitor	Preclinical	-5.88487	-16.2934	-10.4085
NCGC00386828-02	ML 354			-11.4739	-21.8778	-10.4038
NCGC00373041-06	Favipiravir	RNA-dependant RNA polymeriase	Approved	19.6621	9.25984	-10.4022
NCGC00018171-06	Clidinium bromide			32.5799	22.1797	-10.4002
NCGC00181129-12	Dasatinib	Bcr-Abl Inhibitor	Approved	-265.308	-275.707	-10.3987
NCGC00389216-01	MK-2461	FGFR 1/2/3 Inhibitor	Phase I/II	-91.3794	-101.774	-10.3949
NCGC00347217-01	PRP003-013	DDR1 Inhibitor	Biological Testing	-78.5089	-88.8965	-10.3876
NCGC00385118-01		<MOA Unknown> | Class: Iridoide | Genus: N/A | Family: N/A | Species: N/A		13.3501	2.96816	-10.382
NCGC00163818-04	Azoxystrobin			-41.2169	-51.5957	-10.3788
NCGC00386520-01	U 92016A	Dopamine D2 receptor Antagonist		11.4135	1.03669	-10.3768
NCGC00091033-09	Gibberellic acid	steroid biosynthetic process Activator		-10.9502	-21.3241	-10.3739
NCGC00016799-08	Suxibuzone	Prostaglandin G/H synthase 2 Inhibitor		12.7945	2.42297	-10.3715
NCGC00167521-02	Tenatoprazole	Potassium-transporting ATPase Inhibitor	Discontinued	20.1084	9.75282	-10.3556
NCGC00346842-04	Indoximod	IDO Inhibitor	Phase II/III	4.11357	-6.23431	-10.3479
NCGC00408881-01	TGF-B-recpotor inhibitor	TGF-beta receptor type-1 Inhibitor		-30.6894	-41.0253	-10.3358
NCGC00371127-01	CW069	Kinesin-like protein KIFC1 Inhibitor		8.63713	-1.69332	-10.3304
NCGC00159358-03	Nitrazepam	GABA-A receptor; anion channel Agonist		-16.8791	-27.2055	-10.3264
NCGC00386162-02	Glycyrrhizic Acid	Thrombin Inhibitors		-18.9653	-29.2905	-10.3251
NCGC00402313-04	YMU1			-35.0557	-45.3666	-10.3109
NCGC00345832-02	SD-06	p38 MAPK Inhibitor	Phase I	-5.09375	-15.3938	-10.3001
NCGC00015675-22	Milrinone	Phosphodiesterase III (PDE3) Inhibitor	Approved	14.196	3.89942	-10.2965
NCGC00372509-03	BMS-4	LIMK1/LIMK2 Inhibitor	Biological Testing	-2.78868	-13.0784	-10.2897
NCGC00263561-01	Nandrolone decanoate			-0.341227	-10.6264	-10.2852
NCGC00384703-01		<MOA Unknown> | Class: Terpenoid | Genus: N/A | Family: N/A | Species: N/A		3.30855	-6.97343	-10.282
NCGC00263110-02	Osanetant	Tachykinin NK3 Antagonist	Discontinued	-128.852	-139.124	-10.2721
NCGC00347583-02		<MOA Unknown> | Class: Diterpen | Genus: Pinus | Family: Pinaceae | Species: nigra nigra		11.3118	1.05188	-10.2599
NCGC00378974-02	DCC-2618	PDGFR alpha Inhibitor	Phase III	-64.3243	-74.5804	-10.256
NCGC00370899-02	Golgicide A	Golgi-specific brefeldin A-resistance guanine nucleotide exchange factor 1 Inhibitor		-71.827	-82.07	-10.243
NCGC00387777-01	Phosphodiesterase 4 inhibitor	"cAMP-specific 3',5'-cyclic phosphodiesterase 4D Inhibitor"		14.0544	3.81308	-10.2413
NCGC00380437-01		<MOA Unknown> | Class: Terpenoid | Genus: N/A | Family: N/A | Species: N/A		-77.5197	-87.7549	-10.2352
NCGC00385705-01		glucose import Inhibitor		-62.1071	-72.337	-10.2298
NCGC00345840-02	Merck-22-6	AKT Inhibitor	Biological Testing	-102.484	-112.707	-10.2229
NCGC00018158-09	Doxazosin mesylate	alpha1-Adrenoceptor Antagonists		-28.178	-38.3999	-10.2219
NCGC00167513-09	Vandetanib	EGFR Inhibitor	Approved	-87.2024	-97.4201	-10.2177
NCGC00485046-01	PF-06439015	ALK Inhibitor	Biological Testing	-70.3053	-80.5109	-10.2057
NCGC00387774-01	MMP-13 inhibitor	Matrix metalloproteinase 13 Inhibitor		12.4595	2.25517	-10.2043
NCGC00016011-14	Tyramine			11.8577	1.66713	-10.1905
NCGC00346938-03	E5555	Thrombin Inhibitor	Discontinued	-53.2806	-63.471	-10.1903
NCGC00378610-01	Topiroxostat	Xanthine dehydrogenase Inhibitor		12.1514	1.96701	-10.1844
NCGC00167509-02	Pipethanate ethylbromide	Muscarinic acetylcholine receptor Antagonist		16.1101	5.93553	-10.1746
NCGC00169403-02		<MOA Unknown> | Class: Iridoid | Genus: Scrophularia | Family: Scrophulariaceae | Species: lyrata		10.9369	0.769549	-10.1674
NCGC00356070-01				7.78175	-2.37168	-10.1534
NCGC00389263-01	Skepinone-L	MAP kinase p38 alpha Inhibitor		-50.1117	-60.2646	-10.1529
NCGC00509939-01	IPI-549	PI3Kgamma Inhibitor	Phase I	-95.2106	-105.359	-10.148
NCGC00159504-04	Thymol iodide			16.2542	6.11334	-10.1409
NCGC00016018-10	Tetrahydrozoline hydrochloride	Adrenergic receptor alpha Agonist		13.6458	3.51766	-10.1281
NCGC00247751-02				-87.6306	-97.7583	-10.1277
NCGC00016645-03	Methacycline hydrochloride	Tetracycline Antibiotic	Approved	-4.34357	-14.4545	-10.111
NCGC00166219-02	Bipenamol			6.0522	-4.05274	-10.1049
NCGC00385952-01		<MOA Unknown> | Class: Terpenoid | Genus: N/A | Family: N/A | Species: N/A		-2.95693	-13.0447	-10.0878
NCGC00182548-02	Flutropium bromide	Muscarinic acetylcholine receptor Antagonist		14.862	4.77579	-10.0862
NCGC00178007-02	Loganic acid	<MOA Unknown> | Class: Iridoid | Genus: Rauvolfia | Family: Apocynaceae | Species: caffra		-28.2396	-38.3237	-10.0841
NCGC00370889-01	UBP 310	Glutamate receptor ionotropic kainate 3 Antagonist		10.0675	0	-10.0675
NCGC00253672-01	(2S,3s)-3-hydroxy-2-(4-methoxyphenyl)-2,3-dihydro-1,5-benzothiazepin-4(5h)-one			-15.0465	-25.0935	-10.047
NCGC00179367-03	Iopromide			11.6608	1.62775	-10.033
NCGC00263474-01	7-Aminocephalosporanic acid	Cephalosporin intermediate		-16.0359	-26.0675	-10.0317
NCGC00346624-01	A-66	PI3Kalpha Inhibitor	Biological Testing	-72.153	-82.1814	-10.0285
NCGC00179596-11	Butoconazole nitrate	Antifungal Agent	Approved	-10.0403	-20.0637	-10.0235
NCGC00385673-01		<MOA Unknown> | Class: Steroid | Genus: Acocanthera | Family: Apocynaceae | Species: schimperii		-256.245	-266.259	-10.0142
NCGC00385719-01		<MOA Unknown> | Class: N/A | Genus: N/A | Family: N/A | Species: N/A		-12.6478	-22.659	-10.0112
NCGC00015116-20	Aniracetam	AMPA receptor modulator	Approved	10.1495	0.1423	-10.0072
NCGC00346937-01	Ombrabulin	Tubulin polymerization Inhibitor	Discontinued	-234.765	-244.771	-10.0059
NCGC00385734-01		<MOA Unknown> | Class: Terpenoid | Genus: N/A | Family: N/A | Species: N/A		-1.7787	-11.7655	-9.98676
NCGC00185747-02	Niceritrol	Hydroxycarboxylic acid receptor 2 Agonist		15.1186	5.15728	-9.96132
NCGC00164543-02	Lomerizine dihydrochloride	Ca channel blocker - benzhydryl class		-11.401	-21.3525	-9.95151
NCGC00475729-01	BMS-906024	Notch Signaling Inhibitor	Phase I	-29.0622	-39.0039	-9.94168
NCGC00386335-01	SC75741	Nuclear factor NF-kappa-B complex Inhibitor		-93.033	-102.963	-9.93006
NCGC00510683-01	PF-04937319	Glucokinase Activator	Discontinued	20.7365	10.8087	-9.92787
NCGC00496910-01	Daprodustat	HIF Prolyl Hydroxylase Inhibitor	Phase III	4.85635	-5.06314	-9.91949
NCGC00263186-11	SGI-1776	Pim-1/Flt3 Inhibitor	Discontinued	-123.138	-133.052	-9.91417
NCGC00390369-01	MRL-24	Peroxisome proliferator-activated receptor gamma Partial Agonist		5.23234	-4.68029	-9.91263
NCGC00389620-02	WP-1130	Jak2 Inhibitor		-91.9733	-101.878	-9.90475
NCGC00345810-01	Tetrahydrouridine	Cytidine Deaminase Inhibitor	Phase II	21.5057	11.6029	-9.90277
NCGC00370740-02	LY450108	Glutamate receptor ionotropic AMPA Positive Allosteric Modulator		7.31374	-2.58704	-9.90078
NCGC00253740-06	Lacosamide	NMDA Glycine-Site Antagonist	Approved	12.5514	2.6612	-9.89023
NCGC00160518-04	Orbifloxacin	DNA gyrase Binding Agent		3.31196	-6.56875	-9.88071
NCGC00346685-03	KW-2478	Heat Shock Protein 90 (hsp90) Inhibitor	Discontinued	-247.846	-257.716	-9.8704
NCGC00263473-01	cis-Nanophine hydrochloride			15.4036	5.53613	-9.86743
NCGC00347731-02		<MOA Unknown> | Class: Shikimate | Genus: Jasminum | Family: N/A | Species: multiflorum		-1.6352	-11.4951	-9.85989
NCGC00181337-03	2,4-Dichlorobenzyl alcohol			21.6342	11.7784	-9.85578
NCGC00095116-05	Metaxalone			14.4496	4.60455	-9.84501
NCGC00168806-03		<MOA Unknown> | Class: Diterpen | Genus: Dodonaea | Family: Sapindaceae | Species: viscosa		-7.11735	-16.9612	-9.84384
NCGC00166247-02	Carbocyanine			-195.955	-205.795	-9.83954
NCGC00356071-11	CPI-203	Bromodomain-containing protein 4 Inhibitor	Preclinical	-229.058	-238.894	-9.83634
NCGC00346658-09	Crenolanib	PDGFR beta Inhibitor	Phase III	-101.6	-111.433	-9.83285
NCGC00164574-06	Erlotinib	EGFR Inhibitor	Approved	-35.872	-45.6922	-9.82022
NCGC00249898-01	Sodium 3, 4-dimethylphenyl-glyoxylate			11.3733	1.55743	-9.8159
NCGC00090820-03	4-Acetamidobenzoic acid	immune response Modulator		13.2771	3.46247	-9.81468
NCGC00351598-04	WHI-P154	EGFR Inhibitor	Preclinical	-38.1368	-47.9403	-9.80351
NCGC00380687-01		<MOA Unknown> | Class: Saponin | Genus: Gilbertiodendron | Family: Fabaceae | Species: limba		-85.4841	-95.2817	-9.7976
NCGC00380719-01		<MOA Unknown> | Class: Diterpen | Genus: Picea | Family: Pinaceae | Species: abies		-31.8553	-41.6447	-9.78939
NCGC00261973-01	Butoctamide semisuccinate			21.4796	11.6926	-9.78697
NCGC00025002-04	AF-DX 116	Muscarinic acetylcholine receptor M4 Antagonist		9.59632	-0.188638	-9.78496
NCGC00164555-03	Entacapone	NCI-H1299 Inhibitor		-14.0794	-23.8524	-9.77296
NCGC00386772-02	PK-THPP	Potassium channel subfamily K member 9 Antagonist		-21.5053	-31.278	-9.77263
NCGC00379033-04	Rivaroxaban	Coagulation Factor Xa Inhibitor	Approved	-1.99909	-11.771	-9.77194
MLS002608514-02				-11.1582	-20.9295	-9.77132
NCGC00160508-03	Isosorbide			29.5064	19.7363	-9.77013
NCGC00378787-01	Calcium-Sensing Receptor Antagonists I	Calcium sensing receptor Antagonist		-88.0856	-97.8493	-9.76371
NCGC00390638-01	Mutated EGFR-IN-1			-12.0872	-21.8391	-9.75188
NCGC00389590-03	THZ1	CDK 7 Inhibitor	Preclinical	-299.154	-308.895	-9.74132
NCGC00091009-05	17-Methyltestosterone	Aromatase Inhibitor		-41.1051	-50.8424	-9.73728
NCGC00094854-07	Allantoin	Allantoinase Substrate		15.5939	5.85687	-9.73705
NCGC00384189-06	UNC0379	N-lysine methyltransferase SETD8 Inhibitor		-116.145	-125.872	-9.72707
NCGC00380254-01		<MOA Unknown> | Class: Alkaloid | Genus: N/A | Family: N/A | Species: N/A		-12.5301	-22.2419	-9.71185
NCGC00385725-01		<MOA Unknown> | Class: Terpenoid | Genus: Lychnophora | Family: N/A | Species: columnaris		-78.2354	-87.9337	-9.69832
NCGC00385291-01		<MOA Unknown> | Class: Terpenoid | Genus: N/A | Family: N/A | Species: N/A		4.06554	-5.63138	-9.69692
NCGC00025018-11	Yohimbine	alpha2-Adrenoceptor Antagonist	Approved	10.3952	0.701303	-9.69389
NCGC00169056-02		<MOA Unknown> | Class: Triterpen | Genus: Rhamnus | Family: Rhamnaceae | Species: lyciodes		-21.6657	-31.3477	-9.68207
NCGC00351778-01	SRT1720			-24.236	-33.9126	-9.6766
NCGC00018211-10	Flumequine			15.1481	5.4804	-9.66768
NCGC00091288-05	Riboflavin	Vitamin	Approved	18.5793	8.92857	-9.65074
NCGC00344572-01	Dikegulac sodium			-18.9934	-28.6376	-9.64426
NCGC00384906-01		<MOA Unknown> | Class: Alkaloid | Genus: N/A | Family: N/A | Species: N/A		-67.6149	-77.257	-9.64219
NCGC00253762-01	1-(2-Chlorophenyl)piperazine			19.4876	9.84957	-9.63798
NCGC00370722-02	ML184			4.62594	-5.00663	-9.63257
NCGC00166294-08	Sparfloxacin	DNA Topoisomerase IV Inhibitor	Approved	5.49042	-4.14049	-9.63091
NCGC00385868-01		<MOA Unknown> | Class: N/A | Genus: N/A | Family: N/A | Species: N/A		-13.3211	-22.948	-9.62689
NCGC00179861-02		<MOA Unknown> | Class: Terpenoid | Genus: Ferula | Family: N/A | Species: jaeschkeana		0.998357	-8.62636	-9.62472
NCGC00378942-02	LY-2090314	GSK-3 beta Inhibitor	Phase II	-362.349	-371.971	-9.62204
NCGC00163376-14	PP1			-51.9213	-61.5383	-9.61709
NCGC00165883-04	Rufinamide	Sodium channel protein type IX alpha subunit Modulator		12.2074	2.61313	-9.59427
NCGC00386925-01				-77.3041	-86.8959	-9.59183
NCGC00263533-01	Penciclovir	Human herpesvirus 1 DNA polymerase Inhibitor		10.5871	0.998725	-9.58834
NCGC00384481-01		<MOA Unknown> | Class: N/A | Genus: N/A | Family: N/A | Species: N/A		1.86702	-7.71879	-9.58581
NCGC00016831-09	Buflomedil hydrochloride	vasodilator	Approved	5.74554	-3.83576	-9.5813
NCGC00163450-06	Ilomastat (GM6001, Galardin)	MMP Inhibitor		2.85936	-6.72091	-9.58027
NCGC00487170-01	Longdaysin			0.450222	-9.12746	-9.57768
NCGC00380916-01		<MOA Unknown> | Class: Alkaloid | Genus: Detarium | Family: N/A | Species: microcarpum		-9.43237	-19.0058	-9.5734
NCGC00379241-02	PD 180970	Tyrosine-protein kinase SRC Inhibitor		-166.461	-176.032	-9.57103
NCGC00509994-02	Vadadustat		Biological Testing	7.93285	-1.62249	-9.55534
NCGC00091396-05	Benzoin			18.6404	9.08582	-9.55461
NCGC00015772-12	Ofloxacin	Antibiotic	Approved	18.3247	8.77035	-9.55431
NCGC00182713-18	Canertinib	EGFR Inhibitor	Phase III	-108.626	-118.179	-9.55276
NCGC00379149-01	(?)-NBI 74330	C-X-C chemokine receptor type 3 Antagonist		-11.7658	-21.3063	-9.5405
NCGC00344620-03	C-646	Histone N-Acetyltransferase (HAT) Inhibitor	Biological Testing	18.4748	8.94452	-9.53028
NCGC00370875-01	LU AA33810	Neuropeptide Y receptor type 5 Antagonist		-19.3492	-28.8765	-9.52732
NCGC00090965-04	Propylparaben			-12.6065	-22.1333	-9.52679
NCGC00510519-01	MI-538	In vivo active Menin-MLL Inhibitor	Preclinical	-72.5184	-82.0284	-9.51002
NCGC00090698-04	1,3-Diphenylguanidine			-20.4982	-30.0028	-9.50465
NCGC00253593-01	Bitolterol	Beta-2 adrenergic receptor Agonist		-0.38214	-9.8805	-9.49836
NCGC00166149-02	(E)-Nitenpyram			28.419	18.931	-9.48798
NCGC00095606-02	(2S,5R)-5-Methyl-2-(propan-2-yl)cyclohexanone	TNF-alpha Inhibitor		12.1595	2.67764	-9.48183
NCGC00384520-01		<MOA Unknown> | Class: Iridoid | Genus: Jasminum | Family: Oleaceae | Species: multiflorum		-6.20003	-15.679	-9.47894
NCGC00380932-01		<MOA Unknown> | Class: sesquiterpene | Genus: Gliocladium | Family: N/A | Species: N/A		-17.9876	-27.4638	-9.47618
NCGC00389226-01	GDC-0152	Inhibitor of apoptosis protein 3 Antagonist	Phase I	-1.77068	-11.2459	-9.47524
NCGC00347546-02		<MOA Unknown> | Class: Terpenoid | Genus: N/A | Family: N/A | Species: N/A		11.6957	2.2295	-9.46618
NCGC00485952-01	GPR40 Activator 2	Free fatty acid receptor 1 Agonist		-18.1923	-27.6483	-9.45607
NCGC00522513-01	EL-102	HIF-1alpha Inhibitor	Preclinical	-232.215	-241.669	-9.45372
NCGC00189130-07	UNC-0631	EHMT2 Inhibitor	Biological Testing	-102.224	-111.673	-9.44856
NCGC00344093-06	Radicicol	Heat shock protein HSP 90 Inhibitor		-162.605	-172.051	-9.44632
NCGC00183023-01	Nitrefazole			17.6117	8.16685	-9.44486
NCGC00481603-01	Fruquintinib	VEGFR-1/2/3 Inhibitor	Pre-registered	0.578316	-8.86605	-9.44437
NCGC00345843-02	AMG-25	KIT Inhibitor	Biological Testing	-50.3676	-59.8056	-9.43804
NCGC00167967-05	Telithromycin	Ketolide antibiotic	Approved	11.0137	1.57576	-9.43794
NCGC00159539-02	GTP 14564			-5.81521	-15.2361	-9.42085
NCGC00386886-01				6.32075	-3.09946	-9.42021
NCGC00262926-01	2-Amino-4-(trifluoromethyl)benzenethiol hydrochloride			-53.2097	-62.6286	-9.41884
NCGC00169025-02		<MOA Unknown> | Class: aromatic polyketide | Genus: N/A | Family: N/A | Species: N/A		9.19861	-0.219768	-9.41838
NCGC00356119-03	GSK-2801	BAZ2B Inhibitor	Preclinical	-20.7582	-30.1681	-9.40989
NCGC00095150-08	Telmisartan	Angiotensin AT1 Antagonist	Approved	9.99644	0.592887	-9.40355
NCGC00021139-11	5,5-Diphenylhydantoin			11.3753	1.97985	-9.39547
NCGC00386423-05	AT-13148	AKT Inhibitor	Phase I	-76.8434	-86.2321	-9.38878
NCGC00385451-01		GABA(A) Receptor Antagonists		-2.35327	-11.742	-9.38877
NCGC00384634-01		<MOA Unknown> | Class: N/A | Genus: N/A | Family: N/A | Species: N/A		-97.8586	-107.241	-9.38219
NCGC00179673-03	Idoxuridine	Anti-Herpes Simplex Virus Drug	Approved	-98.3322	-107.714	-9.38133
NCGC00385394-01		<MOA Unknown> | Class: N/A | Genus: N/A | Family: N/A | Species: N/A		13.0628	3.70334	-9.35949
NCGC00370732-02	ISPA-28			15.6102	6.26422	-9.34599
NCGC00142605-05	Salicin	Antiinflammatory agent	Phase II	12.9576	3.61272	-9.34486
NCGC00164617-04	Adapalene	topical retinoid	Approved	15.9466	6.61184	-9.3348
NCGC00370800-01	CDPPB	Metabotropic glutamate receptor 5 Positive Allosteric Modulator		-30.8216	-40.1555	-9.33389
NCGC00164558-02	Pargeverine hydrochloride			16.827	7.4942	-9.33283
NCGC00346840-03	Tubacin	HDAC Inhibitor	Biological Testing	-131.862	-141.194	-9.33249
NCGC00017338-03	Antimycin A	Antifungal Agent	Preclinical	-115.497	-124.827	-9.33033
NCGC00169695-02		<MOA Unknown> | Class: N/A | Genus: N/A | Family: N/A | Species: N/A		-0.238133	-9.54991	-9.31178
NCGC00159324-04	2-Ethylhexyl salicylate			12.8104	3.50184	-9.30857
NCGC00346587-02	Bergenin	Protein Tyrosine Phosphatase (PTP) Inhibitors		12.151	2.8475	-9.30355
NCGC00347420-02		<MOA Unknown> | Class: Alkaloid | Genus: N/A | Family: N/A | Species: N/A		-55.5183	-64.8211	-9.30282
NCGC00386172-02	Clindamycin	Antibacterial		9.28873	0	-9.28873
NCGC00185770-01	Sucrose octasulfate, sodium salt			20.5193	11.2484	-9.27087
NCGC00386825-01				-14.9699	-24.2293	-9.25937
NCGC00389770-01	Brivanib (BMS-540215)	VEGFR-2,3/FGFR1,2,3 Inhibitor		-51.8863	-61.1393	-9.25294
NCGC00385706-01		<MOA Unknown> | Class: Alkaloid | Genus: N/A | Family: N/A | Species: N/A		3.56971	-5.67484	-9.24456
NCGC00164540-02	Clofexamide			20.0752	10.8389	-9.23627
NCGC00347939-08	BAM-7	BAX Activator	Biological Testing	14.3464	5.11219	-9.23418
NCGC00385947-01		<MOA Unknown> | Class: Alkaloid | Genus: N/A | Family: N/A | Species: N/A		11.2379	2.00873	-9.22916
NCGC00346675-02	AT-406	IAP Inhibitor	Phase II	11.811	2.58578	-9.22526
NCGC00016765-09	Diflunisal	Cyclooxygenase-2 Inhibitor		12.369	3.15557	-9.21342
NCGC00165865-02	Penfluridol	Dopamine receptor Blocker		-88.129	-97.3395	-9.21043
NCGC00378759-01	MMPIP hydrochloride	Metabotropic glutamate receptor 7 Antagonist		-106.283	-115.492	-9.20873
NCGC00521070-01	PF-06282999	myeloperoxidase Inhibitor	Discontinued	12.6324	3.427	-9.20538
NCGC00380234-01		<MOA Unknown> | Class: Sugar | Genus: N/A | Family: N/A | Species: N/A		6.38942	-2.8075	-9.19691
NCGC00169298-03		HMG-CoA reductase Inhibitor		-67.1364	-76.3314	-9.195
NCGC00378586-01	GPR40 Activator 1	Free fatty acid receptor 1 Agonist		-41.3827	-50.5726	-9.18992
NCGC00510484-01	Pemafibrate	PPARalpha Agonist	Approved	1.32242	-7.85118	-9.17361
NCGC00180620-02		<MOA Unknown> | Class: alkaloid | Genus: N/A | Family: N/A | Species: N/A		-29.6378	-38.8083	-9.17044
NCGC00025179-12	Mifepristone	Progesterone Receptor Antagonist	Approved	-58.2076	-67.3769	-9.16924
NCGC00182059-11	Febuxostat	Xanthine Oxidase Inhibitor	Approved	17.4205	8.25199	-9.1685
NCGC00015725-27	Nimesulide	Prostaglandin G/H Synthase 2 (PTGS2; COX-2) Inhibitor	Approved	16.2954	7.12922	-9.16616
NCGC00025355-12	Paroxetine	5-HT Reuptake Inhibitor		-13.2841	-22.4485	-9.16439
NCGC00370739-04	LY404187	Glutamate receptor ionotropic AMPA Positive Allosteric Modulator		-66.788	-75.9445	-9.15657
NCGC00347834-02		<MOA Unknown> | Class: Terpenoid | Genus: N/A | Family: N/A | Species: N/A		12.5818	3.43045	-9.15131
NCGC00188865-10	Pazopanib	VEGFR-1/2/3 Inhibitor	Approved	-86.9842	-96.1333	-9.14906
NCGC00390611-01	GSK2110183 (hydrochloride)			-123.043	-132.192	-9.1484
NCGC00485484-01	THZ-2	CDK 7 Inhibitor	Preclinical	-256.428	-265.57	-9.14165
NCGC00386029-01		<MOA Unknown> | Class: Shikimate | Genus: Jasminum | Family: Oleaceae | Species: multiflorum		-12.1706	-21.3094	-9.13874
NCGC00169691-02		<MOA Unknown> | Class: Iridoid | Genus: Bellardia | Family: Scrophulariaceae | Species: trixago		-46.5182	-55.6542	-9.13595
NCGC00160437-03	Ethebenecid			11.2942	2.16301	-9.13119
NCGC00345791-09	ASP-3026	ALK Inhibitor	Discontinued	-39.1909	-48.3193	-9.12838
NCGC00025167-03	Formoterol Hemifumarate	Voltage-Gated K(V) 7 (KCNQ) Channel Activator		-6.9966	-16.1218	-9.12524
NCGC00346667-07	Lornoxicam	non-steroidal antiinflammatory	Approved	-5.14248	-14.2669	-9.12447
NCGC00385477-01		<MOA Unknown> | Class: Iridoid | Genus: Vitex | Family: Verbenaceae | Species: negundo		-15.4886	-24.6123	-9.1237
NCGC00346592-02	Icariin	Phosphodiesterase V (PDE5) Inhibitor	Preclinical	15.8895	6.7663	-9.12316
NCGC00380573-01		<MOA Unknown> | Class: Triterpen | Genus: trichilia | Family: Meliaceae | Species: americana		-9.64837	-18.7714	-9.12307
NCGC00380879-01		<MOA Unknown> | Class: Shikimi | Genus: Saururus | Family: Saururaceae | Species: chinensis		-80.8733	-89.9953	-9.12196
NCGC00242491-03	SB-265610	CXCR2 Antagonist	Preclinical	8.40434	-0.705273	-9.10962
NCGC00485941-01	CGP-74588 (N-Desmethyl imatinib)	LRRK2 Inhibitor	Biological Testing	-57.0455	-66.1458	-9.10028
NCGC00385015-01		<MOA Unknown> | Class: Iridoid | Genus: N/A | Family: N/A | Species: N/A		9.35703	0.262593	-9.09444
NCGC00274068-07	Itraconazole	cytochrome Inhibitor	Approved	-46.2881	-55.3805	-9.09242
NCGC00484081-01	Ranirestat	Aldose reductase Inhibitor		8.07914	-1.0075	-9.08664
NCGC00485432-01	(-)-Umbellulone	Transient receptor potential cation channel subfamily M member 8 Agonist		-8.31715	-17.4025	-9.0853
NCGC00346579-03	PIK-293	PI3K Inhibitor	Biological Testing	-45.9127	-54.9873	-9.07458
NCGC00388183-01	AS-041164			-30.5412	-39.6155	-9.07428
NCGC00021222-06	Cortodoxone			-21.2062	-30.2733	-9.0671
NCGC00345024-01	GSK3 Inhibitor	GSK-3 Inhibitor	Biological Testing	-324.198	-333.261	-9.06356
NCGC00507962-02	GSK2795039	NADPH Oxidase 2 Inhibitor	Biological Testing	9.65023	0.590993	-9.05923
NCGC00385846-01		<MOA Unknown> | Class: Polyketide | Genus: N/A | Family: N/A | Species: N/A		7.86174	-1.19623	-9.05797
NCGC00250382-05	Sonidegib	Smo Receptor Antagonist	Approved	-88.5089	-97.5665	-9.05762
NCGC00386303-01	IOWH032	Cystic fibrosis transmembrane conductance regulator Inhibitor		-27.7573	-36.8113	-9.05399
NCGC00015162-10	Buspirone	Serotonin 1a (5-HT1a) receptor Partial Agonist		30.3001	21.258	-9.04213
NCGC00380436-01		<MOA Unknown> | Class: Terpenoid | Genus: N/A | Family: N/A | Species: N/A		-12.5716	-21.6128	-9.04122
NCGC00186024-01	SB-525334	TGF-bR1 (ALK5) Inhibitor	Preclinical	-128.718	-137.752	-9.03412
NCGC00386669-01	GW 406381	Cyclooxygenase-2 Inhibitor		-40.0607	-49.0934	-9.03267
NCGC00016618-04	Dimethisoquin hydrochloride	Neuronal acetylcholine receptor; alpha4/beta4 Inhibitor		-35.2644	-44.2944	-9.02997
NCGC00386662-01	SR 144528	Cannabinoid CB1 receptor Inverse Agonist		-6.13037	-15.1586	-9.02827
NCGC00090997-11	Dichlorvos	Butyrylcholinesterase Inhibitor		23.1095	14.0898	-9.01968
NCGC00384868-01		<MOA Unknown> | Class: Shikimate | Genus: N/A | Family: N/A | Species: N/A		-38.595	-47.6078	-9.01273
NCGC00014702-17	WY-14643 (Pirinixic Acid)	Peroxisome proliferator-activated receptor gamma Agonist		9.01147	0	-9.01147
NCGC00346837-02	JZL-195	Monoacylglycerol lipase (MAGL) Inhibitor	Preclinical	4.73015	-4.27787	-9.00802
NCGC00264046-02	Glutathione	"Glutathione reductase, mitochondrial Substrate"		15.3612	6.354	-9.00721
NCGC00351779-01	SIRT1 Activator II	NAD-dependent deacetylase sirtuin 1 Activator		10.8607	1.8578	-9.0029
NCGC00509935-01	AG-881	Mutant IDH1 Inhibitor	Phase I	3.06328	-5.93849	-9.00177
NCGC00178877-05	Methicillin (sodium salt)	peptidoglycan biosynthetic process Inhibitor		-0.615906	-9.61518	-8.99927
NCGC00024714-11	Triprolidine	Histamine H1 receptor Antagonist		0.348915	-8.64957	-8.99848
NCGC00386916-01				3.94324	-5.03708	-8.98032
NCGC00384631-01		Insulin signaling pathway Modulator		-12.9049	-21.8815	-8.97662
NCGC00385741-01		<MOA Unknown> | Class: Polyketide | Genus: N/A | Family: N/A | Species: N/A		-21.8725	-30.8436	-8.97107
NCGC00389668-02	mTORInhibitor,Ku-0063794	mTORC1/2 Inhibitor		-214.966	-223.934	-8.96864
NCGC00388081-01	CAY10677	Isoprenylcysteine carboxyl methyltransferase Inhibitor		-87.6843	-96.6519	-8.96761
NCGC00389221-01	Cathepsin Inhibitor 1			-9.83034	-18.7871	-8.9568
NCGC00482953-01	LP-533401	Tryptophan Hydroxylase 2 (TPH2) Inhibitor	IND Filed	-34.3765	-43.332	-8.95545
NCGC00384889-01		<MOA Unknown> | Class: Terpenoid | Genus: N/A | Family: N/A | Species: N/A		13.48	4.5248	-8.95523
NCGC00386510-01	BMS 270394	Retinoic acid receptor gamma Agonist		1.60593	-7.34888	-8.9548
NCGC00379170-01	MK 1903	Hydroxycarboxylic acid receptor 2 Agonist		10.6169	1.6798	-8.93714
NCGC00094906-06	Nefopam hydrochloride	Serotonin transporter Inhibitor		12.5525	3.61978	-8.93274
NCGC00344562-02	Celiprolol hydrochloride	Beta-2 adrenergic receptor Partial Agonist		11.2966	2.37441	-8.92218
NCGC00016360-06	Monobenzone	topical medical depigmentation treatment	Approved	13.1942	4.28194	-8.91226
NCGC00389340-01	Brivanib	FGFR 1/3 Inhibitor	Phase II	-51.8133	-60.7239	-8.9106
NCGC00384707-01		<MOA Unknown> | Class: Saponin | Genus: Buddleja | Family: Loganiaceae | Species: asiatica		-49.1424	-58.0497	-8.90736
NCGC00390624-01	AZD1283	P2Y purinoceptor 12 Antagonist		1.15605	-7.75033	-8.90638
NCGC00386928-01				-47.1598	-56.0572	-8.89734
NCGC00169467-03		<MOA Unknown> | Class: Saponin | Genus: Agelaea | Family: Connaraceae | Species: obliqua		-5.87192	-14.7659	-8.89399
NCGC00385378-01		<MOA Unknown> | Class: Steroid | Genus: Asclepias | Family: Asclepiadaceae | Species: curassavica		-275.218	-284.107	-8.88877
NCGC00015819-17	Propafenone hydrochloride	Potassium Channel Subfamily K Member 3 (TASK-1; KCNK3) Blocker	Approved	-44.8989	-53.7699	-8.87099
NCGC00385453-01		<MOA Unknown> | Class: Saponin | Genus: N/A | Family: N/A | Species: N/A		4.99389	-3.86153	-8.85543
NCGC00385727-01		<MOA Unknown> | Class: Triterpen | Genus: Crinum | Family: Amaryllidaceae | Species: jagus		-37.4532	-46.3048	-8.85156
NCGC00016794-14	Gemfibrozil	PPARalpha Agonist	Approved	18.2839	9.43431	-8.84962
NCGC00384796-01		<MOA Unknown> | Class: Iridoide | Genus: N/A | Family: N/A | Species: N/A		-7.06736	-15.9142	-8.84679
NCGC00183362-01	Pentagastrin	CCK2 receptor Agonist	Approved	9.59465	0.748957	-8.84569
NCGC00095303-04	Cloxyquin	Mycobacterium tuberculosis Inhibitor		-10.2876	-19.1294	-8.84185
NCGC00169266-02		neutrophil migration Inhibitor		-24.5427	-33.381	-8.83824
NCGC00371138-10	PTC-209	Polycomb complex protein BMI-1 Inhibitor		-126.47	-135.302	-8.83247
NCGC00093739-13	Cotinine	Neuronal acetylcholine receptor protein alpha-7 subunit Agonist		22.5115	13.6806	-8.83094
NCGC00092381-05	ABT-702	Adenosine Kinase Inhibitor	Preclinical	-17.3648	-26.1817	-8.8169
NCGC00163319-03	Adenosine-5-phosphate	5'-nucleotidase Substrate		8.36036	-0.456154	-8.81652
NCGC00253719-01	5-Chloro-1-(4-piperidyl)-1H-benzimidazol-2(3H)-one			22.3429	13.5291	-8.81383
NCGC00346649-04	PKI-402	PI3K Inhibitor	Preclinical	-262.975	-271.788	-8.81304
NCGC00016564-17	Metformin	AMPK Activator	Approved	5.81309	-2.9988	-8.81188
NCGC00095709-08	Tanshinone IIA	TNF-alpha Production Inhibitor	Preclinical	5.70082	-3.11039	-8.81121
NCGC00387166-03	NSC 33994			-75.6378	-84.4396	-8.80179
NCGC00164127-03	4-(1,1,3,3-Tetramethylbutyl)phenol			-10.9731	-19.7744	-8.80121
NCGC00385424-01		<MOA Unknown> | Class: N/A | Genus: N/A | Family: N/A | Species: N/A		7.54096	-1.25701	-8.79797
NCGC00263539-01	Ziprasidone	5-HT2A Antagonists?		-22.7469	-31.543	-8.79614
NCGC00487056-01	Semapimod hydrochloride	toll-like receptor 4 signaling pathway Inhibitor		-47.9003	-56.689	-8.7887
NCGC00386226-04	Pralatrexate	Dihydrofolate Reductase (DHFR) Inhibitors	Approved	-357.615	-366.402	-8.78711
NCGC00016344-07	5-Aminosalicylic acid	reactive oxygen species biosynthetic process Inhibitor		5.44513	-3.3337	-8.77884
NCGC00169148-03		<MOA Unknown> | Class: Iridoid | Genus: Tabebuia | Family: Bignoniaceae | Species: impetiginosa		-33.1434	-41.919	-8.77561
NCGC00159368-05	1-Hexadecanol	Fatty aldehyde dehydrogenase Substrate		10.7236	1.94925	-8.77433
NCGC00485479-01	AFN-1252	Bacterial enoyl-[acyl-carrier-protein] reductase Inhibitor		-2.49704	-11.2684	-8.77137
NCGC00381304-01		<MOA Unknown> | Class: Iridoid | Genus: N/A | Family: N/A | Species: N/A		-10.0817	-18.8445	-8.76286
NCGC00169065-03		<MOA Unknown> | Class: N/A | Genus: N/A | Family: N/A | Species: N/A		-12.1606	-20.922	-8.76139
NCGC00386027-01	Diosgenin	Cyclooxygenase up-regulator	Preclinical	-38.8098	-47.5702	-8.76046
NCGC00386567-01	Flibanserin	Serotonin 2a (5-HT2a) receptor Antagonist		-2.38607	-11.1385	-8.75247
NCGC00380944-01		<MOA Unknown> | Class: Sesquiterpen | Genus: Eucalyptus | Family: Myrtaceae | Species: acmenoides		-25.9149	-34.6512	-8.73627
NCGC00485341-01	N-Acetyl-Leu-Glu-Glu-Asp-7-amido-4-trifluoromethylcoumarin	Caspase-13 Substrate		18.2115	9.47964	-8.73186
NCGC00485967-01	CBB1007 (trihydrochloride)	Lysine-specific histone demethylase 1A Inhibitor		11.5591	2.85188	-8.70724
NCGC00380920-01		<MOA Unknown> | Class: Terpenoid | Genus: N/A | Family: N/A | Species: N/A		-4.37791	-13.0841	-8.70621
NCGC00166207-01	Cridanimod	Interferon Inducers	Approved	16.0865	7.38377	-8.7027
NCGC00166006-02	L-Cystine	Cystine/glutamate transporter Substrate		7.02782	-1.67366	-8.70148
NCGC00178811-03	Hecogenin			10.4437	1.74309	-8.70063
NCGC00380906-01		<MOA Unknown> | Class: N/A | Genus: N/A | Family: N/A | Species: N/A		6.98063	-1.71779	-8.69842
NCGC00094244-15	SU9516			-45.0003	-53.6981	-8.69781
NCGC00385202-01		<MOA Unknown> | Class: Terpenoid | Genus: N/A | Family: N/A | Species: N/A		8.69537	-0.00227266	-8.69765
NCGC00370959-01	BCTC	Vanilloid receptor Antagonist		-17.9119	-26.6023	-8.69048
NCGC00486932-02	TM-5275	PAI Inhibitor	Preclinical	9.05741	0.371247	-8.68617
NCGC00163403-03	PENITREM A	<MOA Unknown> | Class: alkaloid | Genus: N/A | Family: N/A | Species: N/A		-50.9952	-59.6737	-8.67845
NCGC00387858-03	OSI-027	Mammalian target of Rapamycin (mTORC1) Inhibitor	Discontinued	-155.082	-163.759	-8.67704
NCGC00159341-17	Lamivudine	Reverse Transcriptase Inhibitor	Approved	15.395	6.7272	-8.66781
NCGC00390558-02	ALW-II-41-27	RET Inhibitor	Preclinical	-224.712	-233.37	-8.65815
NCGC00263190-13	KU-0064	ATM Kinase Inhibitor	Preclinical	-105.34	-113.998	-8.6579
NCGC00371007-05	ML289	Metabotropic glutamate receptor 3 Negative Allosteric Modulator		-8.47905	-17.1331	-8.65402
NCGC00253758-01	Indobufen	Cyclooxygenase Inhibitor		18.6577	10.0148	-8.64292
NCGC00180760-02		<MOA Unknown> | Class: sesquiterpene | Genus: Fusarium | Family: N/A | Species: N/A		-25.5674	-34.2031	-8.63571
NCGC00385896-01		<MOA Unknown> | Class: Terpenoid | Genus: N/A | Family: N/A | Species: N/A		-22.1163	-30.7513	-8.63502
NCGC00159544-04	Zaldaride maleate	Calmodulin Antagonist	Phase III	-6.65072	-15.284	-8.6333
NCGC00378941-04	Cinaciguat	Soluble Guanylate Cyclase (sGC) Activator	Phase II	12.6799	4.04713	-8.63275
NCGC00346502-06	Dienogest	Synthetic progesterone	Approved	10.9651	2.34087	-8.62419
NCGC00167578-04	Mitiglinide calcium	Insulin Secretagogues	Approved	11.1622	2.54348	-8.61867
NCGC00263195-04	AV-412	EGFR Inhibitor	Phase I	-100.813	-109.427	-8.61386
NCGC00386342-01	INH6	Kinetochore protein NDC80 homolog Inhibitor		-98.5418	-107.144	-8.60255
NCGC00016333-05	Skimmianine	Acetylcholinesterase Inhibitor		-14.0358	-22.6305	-8.59477
NCGC00387230-01	L 012 sodium salt			7.52346	-1.05845	-8.58191
NCGC00169560-02		<MOA Unknown> | Class: Saponin | Genus: n.b. | Family: N/A | Species: N/A		2.86239	-5.7026	-8.56499
NCGC00351481-01	R306465			-228.27	-236.821	-8.55121
NCGC00345800-05	CVT-6883	Adenosine A2B Antagonist	Phase I	10.1648	1.62238	-8.54243
NCGC00263918-03	Epirubicin hydrochloride	DNA Topoisomerase II Inhibitor	Approved	-227.035	-235.571	-8.53589
NCGC00389572-02	Firocoxib	Cyclooxygenase-2 Inhibitor		-5.55036	-14.0817	-8.53133
NCGC00253737-09	Istradefylline	Adenosine A2A Agonist	Approved	-18.1532	-26.6735	-8.52033
NCGC00015966-10	Levosulpiride	Dopamine D2 Antagonist		8.80818	0.288358	-8.51982
NCGC00161416-08	ZM323881 (hydrochloride)			-95.5614	-104.08	-8.51902
NCGC00015233-07	Calmidazolium chloride	CaMK-II Inhibitor	Biological Testing	-80.6089	-89.1154	-8.50654
NCGC00370863-01	BMS 753	Retinoic acid receptor alpha Agonist		4.71316	-3.79094	-8.5041
NCGC00094960-06	Anthraquinone	Beta amyloid A4 protein Binding Agent		18.9532	10.4624	-8.49083
NCGC00384864-01		<MOA Unknown> | Class: Saponin | Genus: N/A | Family: N/A | Species: N/A		-45.6081	-54.0954	-8.48728
NCGC00384804-01		<MOA Unknown> | Class: Shikimate | Genus: N/A | Family: N/A | Species: N/A		-29.3524	-37.8388	-8.48638
NCGC00390653-01	Uprosertib	AKT Inhibitor		-171.293	-179.777	-8.48407
NCGC00485120-01	4-Androsten-11Î²-ol-3,17-dione			16.5829	8.10144	-8.48147
NCGC00015608-22	Loperamide hydrochloride	mu-Opioid Antagonist	Approved	-44.0295	-52.51	-8.48048
NCGC00380980-02		<MOA Unknown> | Class: N/A | Genus: N/A | Family: N/A | Species: N/A		-13.8209	-22.2926	-8.47171
NCGC00380714-01		<MOA Unknown> | Class: Flavonoid | Genus: N/A | Family: N/A | Species: N/A		-14.3486	-22.8159	-8.46735
NCGC00385572-01		<MOA Unknown> | Class: Terpenoid | Genus: N/A | Family: N/A | Species: N/A		-32.9214	-41.3854	-8.46399
NCGC00182999-01	Flomoxef	Streptococcus pneumoniae Inhibitor		4.53794	-3.92542	-8.46336
NCGC00161602-06	Doxycycline	Matrix Metalloproteinase (MMP) Inhibitor	Approved	-15.9466	-24.4094	-8.46274
NCGC00385092-01		inflammatory response Inhibitor		-3.47274	-11.9327	-8.45998
NCGC00016066-14	Urapidil hydrochloride	Adrenergic receptor alpha-1 Antagonist		4.88801	-3.57106	-8.45906
NCGC00402231-02	Dafadine-A	"Sterol 26-hydroxylase, mitochondrial Inhibitor"		-65.4293	-73.8853	-8.45601
NCGC00015278-15	Carisoprodol	Muscle relaxant		6.03649	-2.41413	-8.45062
NCGC00380511-01		<MOA Unknown> | Class: Terpenoid | Genus: N/A | Family: N/A | Species: N/A		9.86153	1.41739	-8.44414
NCGC00385030-01		<MOA Unknown> | Class: Shikimate | Genus: N/A | Family: N/A | Species: N/A		0.824606	-7.6182	-8.4428
NCGC00408930-02	NCGC00408930	NRF2 Inhibitor	Biological Testing	-35.6877	-44.1255	-8.43784
NCGC00386093-01		<MOA Unknown> | Class: N/A | Genus: N/A | Family: N/A | Species: N/A		4.57282	-3.86314	-8.43596
NCGC00385556-01		<MOA Unknown> | Class: Shikimate | Genus: N/A | Family: N/A | Species: N/A		13.934	5.50023	-8.43377
NCGC00169732-02		<MOA Unknown> | Class: Diterpen | Genus: Aspilia | Family: Compositae | Species: mossambicensis		-2.5098	-10.9328	-8.42299
NCGC00378601-01	Eperezolid	Bacterial 70S ribosome Binding Agent		-89.1916	-97.6137	-8.42209
NCGC00378715-01	Coluracetam	High affinity choline transporter 1 Binding Agent		8.42047	0	-8.42047
NCGC00378825-01	BRAF inhibitor	Serine/threonine-protein kinase B-raf Inhibitor		-80.2956	-88.7096	-8.41405
NCGC00380914-01		<MOA Unknown> | Class: Shikimi | Genus: Cymbopogon | Family: Gramineae | Species: citratus		-41.6274	-50.0388	-8.41145
NCGC00025103-05	Monastrol	Kinesin-Like Spindle Protein Inhibitor	Biological Testing	-2.32605	-10.7329	-8.4069
NCGC00181294-01	Thiamine disulfide	HIV Infection Inhibitor		18.7924	10.3928	-8.39954
NCGC00160670-08	Mecarbinate	antiinfluenza drug	Not determined	13.6932	5.30172	-8.39149
NCGC00016035-13	Trazodone hydrochloride	alpha2-Adrenoceptor Antagonists		12.3181	3.93811	-8.37995
NCGC00378594-02	Btk inhibitor 1 (R enantiomer hydrochloride)			-125.031	-133.41	-8.37959
NCGC00159559-10	Eplerenone	Mineralocorticoid Receptor (MR) Antagonist	Approved	16.1504	7.77176	-8.37864
NCGC00380289-01		<MOA Unknown> | Class: Saponin | Genus: N/A | Family: N/A | Species: N/A		-53.6802	-62.0574	-8.37724
NCGC00179805-02		<MOA Unknown> | Class: N/A | Genus: N/A | Family: N/A | Species: N/A		13.173	4.80092	-8.37203
NCGC00253699-01	4'-Tert-butyl-4-chlorobutyrophenone			21.2721	12.9217	-8.35041
NCGC00378596-08	Entospletinib	Syk Kinase Inhibitor	Phase II	-113.269	-121.616	-8.34715
NCGC00387023-01	AG-13958	VEGFR-2 Inhibitor	Discontinued	-87.9201	-96.2556	-8.3355
NCGC00167488-14	Sorafenib	VEGFR-1/2/3 Inhibitor	Approved	-86.0845	-94.4161	-8.33154
NCGC00257498-01	PharmaGSID_48506			1.0852	-7.24599	-8.33119
NCGC00179528-04	L-Mimosine	Tyrosinase Inhibitor		5.39306	-2.92917	-8.32223
NCGC00507850-01	RO-9021	Syk Kinase Inhibitor	Preclinical	-106.381	-114.696	-8.31505
NCGC00370845-01	SB 657510	Urotensin II receptor Antagonist		-75.3227	-83.6377	-8.31496
NCGC00389614-01	CAPECITABINE	Pyrimidine Antagonists		15.7036	7.40589	-8.29769
NCGC00168923-03		inflammatory response Inhibitor		0.566357	-7.72999	-8.29635
NCGC00263531-10	Linezolid	50S Ribosomal Protein Inhibitor	Approved	9.68483	1.39012	-8.29471
NCGC00380546-01		<MOA Unknown> | Class: Terpenoid | Genus: N/A | Family: N/A | Species: N/A		-31.4218	-39.7145	-8.2927
NCGC00381141-01		<MOA Unknown> | Class: Alkaloid | Genus: N/A | Family: N/A | Species: N/A		-0.68354	-8.9743	-8.29076
NCGC00485185-01	NB001			18.3406	10.0514	-8.28922
NCGC00164591-10	Artemether	antimalarial agents	Approved	-7.83305	-16.1197	-8.28667
NCGC00187642-04				3.98062	-4.29823	-8.27885
NCGC00344545-01	3,3',5'-Triiodo-L-thyronine			10.5426	2.26413	-8.27843
NCGC00094614-06	4-Chloro-3,5-dimethylphenol			16.5155	8.24224	-8.27326
NCGC00381135-01		<MOA Unknown> | Class: Terpenoid | Genus: N/A | Family: N/A | Species: N/A		-8.36192	-16.6298	-8.26783
NCGC00384539-01		<MOA Unknown> | Class: Saponin | Genus: Sarcocephalus | Family: Rubiaceae | Species: cordatus		-28.7768	-37.0338	-8.25693
NCGC00244257-02	Momelotinib	Jak1/2 Inhibitor	Phase III	-109.997	-118.248	-8.25181
NCGC00165736-04	Acadesine	AMPK Activator	Phase I/II	7.57027	-0.681209	-8.25148
NCGC00402270-03	DAU5884 hydrochloride	Muscarinic acetylcholine receptor M4 Antagonist		8.95823	0.706834	-8.2514
NCGC00384691-01		<MOA Unknown> | Class: Terpenoid | Genus: Ormocarpum | Family: Papilionaceae | Species: kirkii		-21.1438	-29.3939	-8.25014
NCGC00238621-09	Sotrastaurin	Protein kinase C theta Inhibitor	Phase I/II	-39.9213	-48.1704	-8.2491
NCGC00346436-04	CCT-241533	Chk2 Inhibitor	Preclinical	-136.146	-144.393	-8.24722
NCGC00347376-02		<MOA Unknown> | Class: Saponin | Genus: Myricarubra | Family: Myricaceae | Species: N/A		9.68446	1.4444	-8.24007
NCGC00402250-03	AS-1940477	p38 MAPK Inhibitor	Preclinical	-101.389	-109.622	-8.23239
NCGC00485036-01	BIP-135			-29.46	-37.6848	-8.22477
NCGC00371012-01	JNJ 5207852 dihydrochloride	Histamine H3 receptor Antagonist		-45.7589	-53.9833	-8.22439
NCGC00254535-01	PharmaGSID_47259			13.7134	5.49485	-8.21852
NCGC00183808-12	ML324	JMJ Inhibitor	Biological Testing	-70.2331	-78.4496	-8.21655
NCGC00346718-05	CP-673451	PDGFR beta Inhibitor	Preclinical	-119.927	-128.139	-8.21236
NCGC00386414-01	Blasticidin S HCl	Escherichia coli Inhibitor		7.62002	-0.588609	-8.20863
NCGC00016438-06	Procarbazine hydrochloride	DNA Alkylating Drugs	Approved	4.19873	-4.00781	-8.20653
NCGC00015985-08	Tracazolate hydrochloride			-41.6505	-49.8557	-8.20521
NCGC00263280-01	Ac-SAH-p53-8	HDM2/HDMX Inhibitor	Biological Testing	11.5219	3.32152	-8.20039
NCGC00378719-01	BX 513 hydrochloride	Human herpesvirus 5 chemokine receptor Inverse Agonist		-82.8238	-91.005	-8.18126
NCGC00094358-38	Isotretinoin	Retinoid RAR Agonist	Approved	7.5745	-0.60232	-8.17682
NCGC00384570-01		<MOA Unknown> | Class: Alkaloid | Genus: Rhodiola | Family: Saxifragaceae | Species: rosea		13.0338	4.85887	-8.17488
NCGC00480972-03	GSK-864	IDH1 Inhibitor	Preclinical	-17.8301	-25.9993	-8.1692
NCGC00238452-11	Enzastaurin	PKCa, PKCb, PKCg inhbitor	Phase III	-22.2503	-30.4133	-8.16298
NCGC00389199-01	Imidapril HCl			10.4417	2.27915	-8.16259
NCGC00182996-01	Pamicogrel	platelet aggregation Inhibitor		11.7597	3.59896	-8.16072
NCGC00015829-12	Promazine hydrochloride	Serotonin 2a (5-HT2a) receptor Antagonist		-7.3302	-15.4909	-8.16071
NCGC00378712-01	U 93631	Serotonin 3a (5-HT3a) receptor Antagonist		-5.76593	-13.9247	-8.15873
NCGC00381432-01		<MOA Unknown> | Class: macrolide | Genus: N/A | Family: N/A | Species: N/A		-104.934	-113.08	-8.14665
NCGC00253657-01	2,3-Dimethoxy-5-sulphamoylbenzoic acid			13.4535	5.30811	-8.14538
NCGC00183108-01	Propamidine			-1.62858	-9.7706	-8.14202
NCGC00389321-03	BIBF1120	VEGFR-1/2/3 Inhibitor		-132.106	-140.248	-8.14193
NCGC00178851-03	Moxalactam disodium	Bacterial penicillin-binding protein Inhibitor		17.7831	9.64351	-8.13963
NCGC00142624-05	Lactulose	Synthetic sugar	Approved	25.3531	17.2159	-8.13714
NCGC00023595-03	Loxistatin Acid (E-64C)			-21.2945	-29.4165	-8.12194
NCGC00386098-01		<MOA Unknown> | Class: N/A | Genus: N/A | Family: N/A | Species: N/A		-51.9069	-60.0242	-8.11735
NCGC00370873-01	PF 750	Anandamide amidohydrolase Inhibitor		-17.3592	-25.466	-8.10675
NCGC00247694-01	N-[1-[1-Methyl-2-(2-thienyl)ethyl]-4-piperidyl]-N-phenylpropanamide hydrochloride			-23.1108	-31.2169	-8.10613
NCGC00095344-03	ZEARALENONE	11-beta-hydroxysteroid dehydrogenase 2 Inhibitor		-4.62665	-12.7298	-8.10313
NCGC00379192-01	TC-G 1006	Sphingosine 1-phosphate receptor 1 Agonist		-2.38482	-10.4855	-8.10072
NCGC00091112-09	Methylrosaniline chloride	TNFR1 (p55/CD120a) Modulator	Approved	-291.744	-299.837	-8.09261
NCGC00168819-02		<MOA Unknown> | Class: Peptide | Genus: N/A | Family: N/A | Species: N/A		2.09043	-5.99841	-8.08884
NCGC00180053-03		<MOA Unknown> | Class: N/A | Genus: N/A | Family: N/A | Species: N/A		-12.1944	-20.2813	-8.08685
NCGC00379105-01	JNJ 10397049	Orexin receptor 2 Antagonist		-16.2581	-24.34	-8.08191
NCGC00345173-02	GSK-525768	Brd4 Inhibitor	Biological Testing	-6.69905	-14.7755	-8.07641
NCGC00253698-01	2-Acetylbenzo[b]thiophene			9.73989	1.66779	-8.0721
NCGC00345836-13	SMI-4a	Pim-1 Kinase Inhibitor	Biological Testing	-11.4056	-19.4755	-8.06986
NCGC00387475-02	GSK-2194069	Fatty Acid Synthase (FAS) Inhibitor	Preclinical	-0.0151781	-8.07883	-8.06365
NCGC00386927-01				-6.29344	-14.3568	-8.0634
NCGC00380456-01		<MOA Unknown> | Class: Triterpen | Genus: Cassia | Family: Leguminosae | Species: floribunda		-18.8567	-26.919	-8.06235
NCGC00510267-01	PF-06821497	EZH2 Inhibitor	Phase I	3.82021	-4.24092	-8.06113
NCGC00379161-04	ML-228	HIF-1alpha Activator	Biological Testing	-137.921	-145.975	-8.05374
NCGC00379015-02	A 77-01	TGF-beta receptor type I Inhibitor		-7.84435	-15.8787	-8.03435
NCGC00169660-02		<MOA Unknown> | Class: aromatic polyketide | Genus: Anacardium | Family: Anacardiaceae | Species: occidentale		5.38046	-2.65023	-8.03069
NCGC00480754-01	PF 06260933 dihydrochloride			-33.02	-41.046	-8.02601
NCGC00160275-03	Geliomycin	RNA Polymerase Inhibitor		5.10374	-2.91141	-8.01515
NCGC00263577-01	Loxoprofen	Cyclooxygenase-2 Inhibitor		21.342	13.3342	-8.00776
NCGC00264003-02	(2R,3R)-2,3-Dimercaptosuccinic acid	Lead Chelating Agent		19.2434	11.2386	-8.00479
NCGC00017254-09	Cyanein	Golgi-Specific Brefeldin A-Resistance Guanine Nucleotide Exchange Factor 1 (GBF1) Inhibitor	Preclinical	-227.145	-235.142	-7.99728
NCGC00015924-24	Synephrine	alpha1-Adrenoceptor Agonist	Clinical	15.8726	7.88014	-7.99246
NCGC00013917-09	NSC-87877	Protein Tyrosine Phosphatase SHP-2 (PTP2C) Inhibitor	Biological Testing	4.88253	-3.10438	-7.98692
NCGC00389213-02	LY2886721	beta-Secretase 1/2 (BACE1/2) Inhibitors		-37.2506	-45.235	-7.9844
NCGC00380929-01		<MOA Unknown> | Class: sesquiterpene | Genus: N/A | Family: N/A | Species: N/A		-3.19206	-11.1748	-7.98271
NCGC00485942-01	gamma-Secretase Modulators	Gamma-secretase Modulator		-7.32029	-15.2958	-7.97551
NCGC00485486-02	Nastorazepide	CCK2 (CCKB/Gastrin) Receptor Antagonist	Phase II	13.812	5.83729	-7.97469
NCGC00385678-01		<MOA Unknown> | Class: Alkaloid | Genus: N/A | Family: N/A | Species: N/A		9.75515	1.78172	-7.97343
NCGC00025018-10	Yohimbine	alpha2-Adrenoceptor Antagonist	Approved	-22.941	-30.9037	-7.9627
NCGC00384814-01		<MOA Unknown> | Class: N/A | Genus: N/A | Family: N/A | Species: N/A		-18.1763	-26.1386	-7.96227
NCGC00179630-03	Homatropine hydrobromide	Muscarinic acetylcholine receptor Antagonist		19.2241	11.264	-7.96013
NCGC00015950-06	SB-415286	GSK-3 beta Inhibitor	Preclinical	-36.4686	-44.4184	-7.94982
NCGC00386837-01				12.4286	4.47923	-7.94942
NCGC00386848-01				11.0353	3.08829	-7.94704
NCGC00387786-01	[2-Chloro-4-[[4-(2-thienyl)-2-pyrimidinyl]amino]phenyl](4-methyl-1-piperazinyl)-methanone	Glycogen synthase kinase-3 beta Inhibitor		-81.9577	-89.9039	-7.9462
NCGC00385403-01		<MOA Unknown> | Class: Triterpen | Genus: Maerua | Family: Capparaceae | Species: oblongifolia		11.3933	3.45136	-7.94197
NCGC00016410-13	Thiabendazole	Methionine Aminopeptidase-1 (MetAP1) Inhibitor	Withdrawn	-9.26657	-17.207	-7.94041
NCGC00263205-02	Motesanib	VEGFR-1,2,3 Inhibitor	Phase III	-33.6084	-41.5447	-7.93631
NCGC00167473-02	Capreomycin IB			12.3748	4.44547	-7.92932
NCGC00263103-02	Pelitinib	EGFR Inhibitor	Phase II	-171.639	-179.565	-7.92641
NCGC00168832-02		<MOA Unknown> | Class: Saponin | Genus: N/A | Family: N/A | Species: N/A		14.9767	7.0542	-7.92253
NCGC00025176-02	Etomidate	GABAA Receptor Modulator		7.36185	-0.559507	-7.92136
NCGC00016017-08	AG-1478	EGFR Inhibitor	Preclinical	-13.8029	-21.7225	-7.91963
NCGC00378772-01	RO-3	P2X purinoceptor 3 Antagonist		-12.9782	-20.8929	-7.91474
NCGC00378605-01	A 80426 mesylate	serotonin uptake Inhibitor		-6.84525	-14.7555	-7.91026
NCGC00263858-10	Carboplatin	DNA Alkylating Agent	Approved	-15.559	-23.4676	-7.90861
NCGC00090680-06	Carbaryl	Acetylcholinesterase Inhibitor		-18.8279	-26.7365	-7.9086
NCGC00024485-08	(E)-4-amino-2-butenoic acid			13.9117	6.00592	-7.90577
NCGC00387454-02	AC710	Tyrosine-protein kinase receptor FLT3 Inhibitor		-74.4443	-82.347	-7.90267
NCGC00379104-01	NGD 98-2 hydrochloride	Corticotropin releasing factor receptor 1 Antagonist		-35.4931	-43.3925	-7.89946
NCGC00378873-04	Reparixin	Chemokine CXCR1/CXCR2 (IL-8 Receptor) Receptor Antagonist	Phase III	13.7577	5.86901	-7.88865
NCGC00344564-05	Diosmin	Aryl Hydrocarbon Receptor (AhR) Agonist	Approved	16.1091	8.22286	-7.88621
NCGC00253757-01	N,N-Dimethyl-1-octadecanamine			10.1912	2.30616	-7.88509
NCGC00386596-01	Aurora A inhibitor II	Aurora kinase A Inhibitor		-119.24	-127.123	-7.88308
NCGC00371036-02	SB 277011A	Dopamine D3 receptor Antagonist		-19.4929	-27.3754	-7.88247
NCGC00347813-02		<MOA Unknown> | Class: nucleoside | Genus: N/A | Family: N/A | Species: N/A		-19.4519	-27.3258	-7.87393
NCGC00385275-01		<MOA Unknown> | Class: Iridoid | Genus: olea | Family: Oleaceae | Species: europaea		-0.539189	-8.41298	-7.87379
NCGC00178852-04	Tobramycin	30S Ribosomal Protein Inhibitor	Approved	12.7552	4.88278	-7.87238
NCGC00017258-08	Methergine	Serotonin 2b (5-HT2b) receptor Partial Agonist		-11.1293	-18.9843	-7.855
NCGC00247733-01	Buprenorphine hydrochloride			-104.12	-111.972	-7.8518
NCGC00168887-02		<MOA Unknown> | Class: Polyketide | Genus: Brickellia | Family: N/A | Species: spp		-0.562369	-8.40951	-7.84714
NCGC00385663-01		<MOA Unknown> | Class: Shikimate | Genus: N/A | Family: N/A | Species: N/A		9.11084	1.26476	-7.84608
NCGC00385153-01		<MOA Unknown> | Class: Saponin | Genus: N/A | Family: N/A | Species: N/A		13.2294	5.3844	-7.84499
NCGC00346895-01	Amastatin	cytosolic leucine aminopeptidase Inhibitor	Biological Testing	13.5603	5.7162	-7.84408
NCGC00024778-02	Bifemelane	Monoamine oxidase B Inhibitor		-11.0056	-18.8484	-7.84283
NCGC00263570-01	Sivelestat sodium hydrate			21.5688	13.7281	-7.84066
NCGC00164513-02	Benzoylpas			12.5996	4.76607	-7.83356
NCGC00386005-01		<MOA Unknown> | Class: Steroid | Genus: Dregea | Family: Asclepiadaceae | Species: sp.		-13.0183	-20.8456	-7.82729
NCGC00346525-07	Aurora A Inhibitor I	Aurora A Inhibitor	Biological Testing	-164.331	-172.158	-7.82668
NCGC00379339-01	Brincidofovir	DNA polymerase Inhibitor	Phase III	-40.8985	-48.7243	-7.82585
NCGC00263544-01	Dexrazoxane hydrochloride	DNA Topoisomerase II Inhibitor	Approved	-24.331	-32.1552	-7.82419
NCGC00162380-03	CGP 57380	MAP kinase-interacting serine/threonine-protein kinase MNK1 Inhibitor		-10.0619	-17.8837	-7.82183
NCGC00385224-01		<MOA Unknown> | Class: Terpenoid | Genus: N/A | Family: N/A | Species: N/A		11.5831	3.7618	-7.82128
NCGC00370807-05	FIPI hydrochloride	Phospholipase D2 Inhibitor		-20.1858	-28.0067	-7.82094
NCGC00380560-01		<MOA Unknown> | Class: Triterpen | Genus: Canarium | Family: Burseraceae | Species: album		0.37596	-7.43878	-7.81474
NCGC00381125-01		<MOA Unknown> | Class: Saponin | Genus: Centella | Family: Apiaceae | Species: asiatica		9.33296	1.52909	-7.80386
NCGC00249110-04	Sucralose			7.79987	0	-7.79987
NCGC00253707-01	1-(Bis(4-fluorophenyl)methyl)piperazine			10.2177	2.41948	-7.79818
NCGC00188864-02	Iloperidone	Dopamine D2 Antagonist		-10.421	-18.2188	-7.79787
NCGC00015999-19	Tolbutamide	"Sulfonylurea receptor 1, Kir6.2 Inhibitor"		21.6283	13.8335	-7.79487
NCGC00183021-01	Pifoxime	Cyclooxygenase Inhibitor		15.5198	7.74679	-7.77306
NCGC00346465-01	GDC-0349	Pim-3 Kinase Inhibitor, mTOR	Discontinued	-134.353	-142.126	-7.77305
NCGC00180860-02		<MOA Unknown> | Class: Terpenoid | Genus: N/A | Family: N/A | Species: N/A		-11.7637	-19.5248	-7.76115
NCGC00346495-12	TGX-221	PI3Kbeta Inhibitor	Preclinical	-80.0044	-87.7376	-7.73323
NCGC00169904-02		<MOA Unknown> | Class: Shikimate | Genus: N/A | Family: N/A | Species: N/A		3.32628	-4.40363	-7.72991
NCGC00510682-01	GSK-2250665A	ITK Inhibitor	Biological Testing	-17.0854	-24.8125	-7.7271
NCGC00385590-01		<MOA Unknown> | Class: N/A | Genus: N/A | Family: N/A | Species: N/A		5.73366	-1.99322	-7.72688
NCGC00347495-02		<MOA Unknown> | Class: Terpenoid | Genus: N/A | Family: N/A | Species: N/A		-46.1588	-53.8828	-7.72396
NCGC00381426-01		<MOA Unknown> | Class: N/A | Genus: N/A | Family: N/A | Species: N/A		2.78625	-4.93651	-7.72276
NCGC00169062-04		<MOA Unknown> | Class: macrolide | Genus: N/A | Family: N/A | Species: N/A		3.13638	-4.58606	-7.72244
NCGC00485258-01	Methyllycaconitine citrate salt	Neuronal acetylcholine receptor subunit alpha-7 Antagonist		8.69672	0.974803	-7.72192
NCGC00179061-05		Voltage-gated potassium channel subunit Kv4.3 Inhibitor		7.79069	0.0709729	-7.71972
NCGC00385813-01		<MOA Unknown> | Class: Terpenoid | Genus: N/A | Family: N/A | Species: N/A		5.41824	-2.30082	-7.71906
NCGC00015760-12	Octopamine	Dopamine transporter Binding Agent		-28.0868	-35.8025	-7.7157
NCGC00073457-04	Metomidate hydrochloride	Cytochrome P450 2A5 Inhibitor		15.6798	7.96917	-7.71065
NCGC00346589-02	Cinchonidine	Alkaloid; P-Glycoprotein (MDR-1) Inhibitor		-0.180637	-7.887	-7.70637
NCGC00249920-01	Nandrolone cyclohexylpropionate	Androgen Receptor Agonist		-46.895	-54.5998	-7.70489
NCGC00169730-03		<MOA Unknown> | Class: aromatic polyketide | Genus: N/A | Family: N/A | Species: N/A		-15.2906	-22.9844	-7.69378
NCGC00180052-02		<MOA Unknown> | Class: Monoterpen | Genus: Putoria | Family: N/A | Species: calabrica		-2.12254	-9.81627	-7.69373
NCGC00386022-01		<MOA Unknown> | Class: Fatty acid | Genus: Vicoa | Family: Compositae | Species: indica		-1.12552	-8.81101	-7.68548
NCGC00253720-01	5-Chlorooxindole			20.1475	12.4703	-7.6772
NCGC00016490-12	Flufenamic acid	Cyclooxygenase-2 Inhibitor		11.9674	4.30075	-7.66666
NCGC00490685-01	DDD107498			-41.519	-49.1848	-7.66585
NCGC00263088-04	BAG-956	PI3K/PDK1 Inhibitor	Preclinical	-55.7891	-63.4547	-7.66559
NCGC00386371-04	Ro3280	Serine/threonine-protein kinase PLK1 Inhibitor		-290.335	-297.999	-7.66414
NCGC00522465-01	GNF-6231	Wnt Signaling Inhibitor	Preclinical	4.50196	-3.15913	-7.66109
NCGC00509989-01	MK-0557	Neuropeptide Y5 (NPY Y5) Receptor Antagonist	Phase II/III	1.28331	-6.37716	-7.66048
NCGC00015256-12	Chloroquine	antimalarial agents	Approved	0.179845	-7.47817	-7.65801
NCGC00402329-01	FKGK18	Calcium-independent phospholipase A2 Inhibitor		-16.1364	-23.7851	-7.64871
NCGC00378613-03	DDR1-IN-1	Epithelial discoidin domain-containing receptor 1 Inhibitor		-65.5742	-73.222	-7.64782
NCGC00379068-01	MK-0591	5-lipoxygenase activating protein Inhibitor		9.42003	1.77579	-7.64424
NCGC00344077-02	GSK 264220A	Endothelial lipase Inhibitor		7.05415	-0.58399	-7.63814
NCGC00179424-04	Furaltadone hydrochloride			-9.00848	-16.6438	-7.63537
NCGC00347391-02		<MOA Unknown> | Class: Alkaloid | Genus: Vinca | Family: N/A | Species: sp.		-14.229	-21.8643	-7.63529
NCGC00263129-21	Palbociclib	CDK4/6 Inhibitor	Phase I	-133.651	-141.286	-7.6348
NCGC00386351-01	Zotarolimus(ABT-578)	smooth muscle cell proliferation Inhibitor		-163.749	-171.383	-7.63443
NCGC00188898-01				-3.3624	-10.9872	-7.6248
NCGC00164563-13	Entecavir	DNA Polymerase Inhibitors	Approved	-0.918922	-8.53875	-7.61983
NCGC00385948-01		<MOA Unknown> | Class: Alkaloid | Genus: N/A | Family: N/A | Species: N/A		-67.16	-74.7765	-7.6165
NCGC00370922-01	Ro 67-4853	Metabotropic glutamate receptor 5 Positive Allosteric Modulator		8.92991	1.32273	-7.60718
NCGC00380228-01		<MOA Unknown> | Class: Terpenoid | Genus: N/A | Family: N/A | Species: N/A		-52.9146	-60.5214	-7.60678
NCGC00253688-01	Pentifylline			16.314	8.70795	-7.60604
NCGC00385739-01		<MOA Unknown> | Class: Saponin | Genus: N/A | Family: N/A | Species: N/A		-10.7526	-18.3503	-7.59775
NCGC00370859-01	NAD 299 hydrochloride	Serotonin 1a (5-HT1a) receptor Antagonist		12.656	5.06217	-7.59388
NCGC00092310-14	Amisulpride	Dopamine D2/D3 Antagonist	Approved	14.804	7.21426	-7.58973
NCGC00522580-01	CC-115	DNA-PK Inhibitor	Phase II	-171.055	-178.64	-7.58531
NCGC00378914-01	AM966	Lysophosphatidic acid receptor Edg-2 Antagonist		-24.8483	-32.4281	-7.57984
NCGC00480825-02	RPI-1			-7.34428	-14.919	-7.57473
NCGC00344523-01	L-(-)-Sorbose			19.2199	11.6467	-7.57317
NCGC00385445-01		<MOA Unknown> | Class: Terpenoid | Genus: N/A | Family: N/A | Species: N/A		11.813	4.24056	-7.57241
NCGC00384806-01		<MOA Unknown> | Class: Terpenoid | Genus: N/A | Family: N/A | Species: N/A		-8.55972	-16.1282	-7.56852
NCGC00390417-03	GSK-872	RIP3 kinase Inhibitor	Biological Testing	-42.3381	-49.8929	-7.55473
NCGC00386368-01	PD128907 HCl	Dopamine D2/D3 Agonist		7.91434	0.360042	-7.5543
NCGC00346508-12	TG-100115	PI3K Inhibitor	Phase I/II	-38.1045	-45.6588	-7.5543
NCGC00015086-04	Acetylcysteine	NF-kappaB Activation Inhibitor	Approved	21.6392	14.0858	-7.55333
NCGC00015455-10	Felodipine	Voltage-gated calcium channel alpha2/delta subunit 1 Inhibitor		-8.53918	-16.0909	-7.55168
NCGC00381024-01		<MOA Unknown> | Class: Monoterpen | Genus: Acacia | Family: Mimosaceae | Species: cyclops		-0.517162	-8.06808	-7.55091
NCGC00095166-04	Clopidol			24.6889	17.1407	-7.54824
NCGC00185990-14	Ketorolac	non-steroidal antiinflammatory	Approved	19.4682	11.9219	-7.54638
NCGC00015802-18	Pimozide	HERG Inhibitor		-44.3072	-51.8527	-7.5455
NCGC00385653-01		<MOA Unknown> | Class: N/A | Genus: N/A | Family: N/A | Species: N/A		-70.1028	-77.6346	-7.53174
NCGC00185981-05				-80.4964	-88.0165	-7.52011
NCGC00167956-01				-109.009	-116.528	-7.51878
NCGC00380775-01		<MOA Unknown> | Class: peptide | Genus: N/A | Family: N/A | Species: N/A		8.4857	0.968282	-7.51742
NCGC00016819-05	Gliquidone	Cytochrome P450 3A4 Substrate		-27.2192	-34.7363	-7.51709
NCGC00370731-05	OXA-01	Serine/threonine-protein kinase mTOR Inhibitor	Preclinical	-87.441	-94.9539	-7.51283
NCGC00263132-06	PF-477736	Chk1 Inhibitor	Discontinued	-165.748	-173.258	-7.50997
NCGC00166138-05	Ethynodiol diacetate	Progesterone receptor Agonist		-39.4298	-46.9396	-7.50972
NCGC00253685-01	Dibenzosuberone			13.2617	5.7779	-7.48383
NCGC00386735-01	AZD-8797	Chemokine CX3CR1 Receptor Antagonist	Phase I	-21.0447	-28.5256	-7.48084
NCGC00162132-03	Methyl L-DOPA hydrochloride			-2.98492	-10.4619	-7.47697
NCGC00016032-11	alpha-Lipoic acid			12.8737	5.39979	-7.47395
NCGC00386449-03	MLN-7243	Ubiquitin-Activating Enzyme E1 Inhibitor	Discontinued	-278.87	-286.34	-7.47041
NCGC00181910-01	N,N-Dimethyl-2-(2-phenylacetamido)acetamide			7.7525	0.286734	-7.46576
NCGC00253659-01	4-(2-Piperidinoethoxy)benzoic acid hydrochloride(1:1)			24.0545	16.5949	-7.4596
NCGC00379255-03	FRAX-486	p21-Activated Kinase 1 (PAK1) Inhibitor	Preclinical	-127.061	-134.506	-7.445
NCGC00346070-09	GSK-2606414	PERK Inhibitor	Preclinical	-29.4031	-36.8438	-7.44072
NCGC00164613-04	Epalrestat	Aldose Reductase Inhibitor	Approved	11.1448	3.70481	-7.44003
NCGC00090987-05	1-Naphthaleneacetic acid	Fusarium oxysporum Inhibitor		14.0386	6.61488	-7.42376
NCGC00015252-17	Cyproheptadine hydrochloride	Histamine H1 Receptor Antagonist	Approved	-31.3285	-38.75	-7.42145
NCGC00347286-15	GSK-126	EZH2 Inhibitor	Discontinued	-25.6744	-33.0924	-7.41799
NCGC00016094-10	17_-hydroxy Wortmannin	PI3K Inhibitor	Preclinical	-59.964	-67.3792	-7.41521
NCGC00386224-06	Icotinib hydrochloride	EGFR Inhibitor	Approved	2.97184	-4.43541	-7.40725
NCGC00164353-11	Mannitol	Osmotic diuretic agent	Not determined	13.9506	6.54504	-7.4056
NCGC00183912-13	FR-180204	ERK1/2 Inhibitor	Preclinical	-10.9258	-18.3311	-7.40524
NCGC00168759-10	PTC-124	CFTR-G542X nonsense allele Inhibitor	Approved	-36.2275	-43.6327	-7.40511
NCGC00160558-02	Diamfenetide			17.0733	9.67098	-7.40232
NCGC00016285-05	Sulfanilamide	Carbonic Anhydrase Type I/II/IX Inhibitor	Approved	-8.44506	-15.8454	-7.40032
NCGC00163329-03	Clopidogrel bisulfate	P2Y12 (P2T) Antagonist	Approved	14.5148	7.11546	-7.39931
NCGC00390607-01	Tesevatinib	EGFR Inhibitor	Phase II	-158.951	-166.35	-7.39923
NCGC00168926-02		<MOA Unknown> | Class: Saponin | Genus: Medicago | Family: Leguminosae | Species: sativa		-47.6058	-55.0024	-7.39665
NCGC00167958-05	Imipenem	Penicillin-binding protein 2 Inhibitor		22.1001	14.7198	-7.38032
NCGC00532294-01	Martinostat	HDAC Inhibitor	Biological Testing	-207.901	-215.276	-7.37559
NCGC00159369-04	1-Octadecanol			18.8575	11.4855	-7.37194
NCGC00169806-03		<MOA Unknown> | Class: N/A | Genus: N/A | Family: N/A | Species: N/A		11.3347	3.96395	-7.37078
NCGC00262603-12	Idelalisib	PI3Kdelta Inhibitor	Approved	-142.459	-149.824	-7.36494
NCGC00385395-01		<MOA Unknown> | Class: Saponin | Genus: N/A | Family: N/A | Species: N/A		-86.4572	-93.8158	-7.35863
NCGC00371133-07	Atglistatin	Patatin-like phospholipase domain-containing protein 2 Inhibitor		2.99824	-4.3571	-7.35533
NCGC00356114-04	SF-22	MCOLN3 protein Activator		1.56317	-5.79081	-7.35398
NCGC00390600-01	Fimasartan	Angiotensin II receptor Antagonist		9.81514	2.46211	-7.35303
NCGC00274275-01	Tripamide	Solute carrier family 12 member 2 Inhibitor		2.57633	-4.75942	-7.33575
NCGC00167465-02	Calcipotriene	Vitamin D receptor Activator		-34.6206	-41.9555	-7.3349
NCGC00345794-10	MLN-4924	NEDD8-Activating Enzyme (NAE) Inhibitor	Phase III	-188.51	-195.841	-7.33186
NCGC00346441-01	ABC-294640	Sphingosine Kinase 1 (SphK1) Inhibitor	Phase II	-9.58891	-16.916	-7.32706
NCGC00179804-02		<MOA Unknown> | Class: Saponin | Genus: n.b. | Family: N/A | Species: N/A		-26.7521	-34.0791	-7.327
NCGC00485006-01	(+)-N-Allylnormetazocine hydrochloride	Sodium channel protein type IV alpha subunit Inhibitor		10.2502	2.93338	-7.31684
NCGC00485093-01	Trandolapril			4.27963	-3.03539	-7.31502
NCGC00091616-03	2-Ethoxybenzamide			-23.7196	-31.0344	-7.31478
NCGC00017254-05	Cyanein	Golgi-Specific Brefeldin A-Resistance Guanine Nucleotide Exchange Factor 1 (GBF1) Inhibitor	Preclinical	-184.897	-192.212	-7.31426
NCGC00167746-09	PNU-120596	Nicotinic alpha7 Positive Allosteric Modulators	Preclinical	-48.7098	-56.024	-7.31417
NCGC00021123-03	Diatrizoic acid dihydrate			13.9297	6.61613	-7.31359
NCGC00025219-10	Purvalanol A	CDK1/2/3/4/5 Inhibitor	Preclinical	-49.8466	-57.1552	-7.30859
NCGC00386672-01	WYE 672	LXR-beta Partial Agonist		-84.2575	-91.5626	-7.30508
NCGC00384750-01		<MOA Unknown> | Class: Sugar | Genus: N/A | Family: N/A | Species: N/A		8.35862	1.05776	-7.30086
NCGC00390608-01	CZC-25146	Leucine-rich repeat serine/threonine-protein kinase 2 Inhibitor		-67.5485	-74.8392	-7.29063
NCGC00378725-02	CP 154526 hydrochloride	Corticotropin releasing factor receptor 2 Antagonist		-1.96055	-9.24396	-7.28341
NCGC00381157-01		<MOA Unknown> | Class: sesquiterpene | Genus: N/A | Family: N/A | Species: N/A		-13.4871	-20.7683	-7.28126
NCGC00385181-01		<MOA Unknown> | Class: Sugar | Genus: N/A | Family: N/A | Species: N/A		-21.7143	-28.9937	-7.27948
NCGC00160389-09	Cypermethrin			4.59025	-2.68921	-7.27946
NCGC00380670-01		<MOA Unknown> | Class: Terpenoid | Genus: Cassia | Family: Leguminosae | Species: sp.		6.09118	-1.18485	-7.27603
NCGC00389341-01	Dihydroeponemycin	26S proteosome Inhibitor		-29.5888	-36.8628	-7.27403
NCGC00387206-01	TC-G 1001	G-protein coupled receptor 35 Agonist		8.95576	1.6975	-7.25826
NCGC00186028-04	Levetiracetam	N-Type Calcium Channel (Ca(v) 2.2) Blocker	Approved	11.0523	3.795	-7.25727
NCGC00160670-03	Mecarbinate	antiinfluenza drug	Not determined	11.7546	4.50352	-7.25107
NCGC00263657-01	Methoprene			21.513	14.263	-7.25005
NCGC00385974-01		<MOA Unknown> | Class: Diterpen | Genus: Maba | Family: Ebenaceae | Species: buxifolia		12.4961	5.25082	-7.24526
NCGC00385171-01		<MOA Unknown> | Class: Saponin | Genus: Madhuca | Family: Sapotacea | Species: butyracea		-53.9198	-61.1581	-7.23824
NCGC00384645-01		<MOA Unknown> | Class: aromatic polyketide | Genus: Brucea | Family: Simaroubaceae | Species: javanica		-18.4661	-25.6914	-7.2253
NCGC00385801-01		<MOA Unknown> | Class: Flavon | Genus: Lactuca | Family: Compositae | Species: capensis		-31.4352	-38.6546	-7.21948
NCGC00487129-01	N-[4-[(6,7-Dimethoxy-4-quinazolinyl)amino]phenyl]benzamide hydrochloride			-66.4882	-73.7037	-7.21551
NCGC00385274-01		<MOA Unknown> | Class: Sesquiterpen | Genus: Conyza | Family: Asteraceae | Species: sp.		-44.5388	-51.7468	-7.20799
NCGC00384203-01	SR10067	Nuclear receptor subfamily 1 group D member 1 Agonist		15.9892	8.78139	-7.20782
NCGC00481590-01	Radotinib(IY-5511)	Bcr/Abl fusion protein Inhibitor		-13.0566	-20.2623	-7.20572
NCGC00188399-16	Fingolimod hydrochloride	Sphingosine Kinase 1 (SphK1) Inhibitor	Approved	-70.9208	-78.1255	-7.20477
NCGC00023902-09	4-Androstene-3,17-dione	Cytochrome P450 19A1 Substrate		-2.79858	-10.0025	-7.20388
NCGC00389372-02	AZD8055	mTORC1/2 Inhibitor		-240.287	-247.488	-7.20123
NCGC00378619-01	CAY10650	85 kDa calcium-independent phospholipase A2 Inhibitor		1.7293	-5.46947	-7.19877
NCGC00142619-04	Epiandrosterone	Glucose-6-phosphate 1-dehydrogenase Inhibitor		-1.90418	-9.10022	-7.19604
NCGC00015451-05	Flupirtine maleate	Voltage-Gated K(V) 7 (KCNQ) Channel Activator	Withdrawn	1.53714	-5.65749	-7.19463
NCGC00387875-03	Voxtalisib	mTORC1/2 Inhibitor	Phase I/II	-181.086	-188.272	-7.18665
NCGC00380271-01		<MOA Unknown> | Class: Terpenoid | Genus: N/A | Family: N/A | Species: N/A		-6.19039	-13.3766	-7.18623
NCGC00092293-15	Ro 31-8220 (mesylate)			-131.452	-138.637	-7.18482
NCGC00380953-01		<MOA Unknown> | Class: Steroide | Genus: N/A | Family: N/A | Species: N/A		-45.358	-52.5418	-7.18384
NCGC00253867-02	Prucalopride	5-HT4 Agonist	Clinical	-10.5617	-17.743	-7.1813
NCGC00090759-05	Cisplatin	DNA Alkylating Agent	Approved	-19.0292	-26.2079	-7.17868
NCGC00253621-01	1,1-Dimethoxy-2-(2-methoxyethoxy)ethane			17.6743	10.4983	-7.17606
NCGC00161407-08	LY 303511 (hydrochloride)			0.665207	-6.50424	-7.16944
NCGC00385701-01		<MOA Unknown> | Class: Terpenoid | Genus: N/A | Family: N/A | Species: N/A		4.6553	-2.50526	-7.16056
NCGC00016246-10	Chlorhexidine	N-Acetyltransferase Eis (Mycobacterium tuberculosis) Inhibitor	Approved	-92.0698	-99.2268	-7.15706
NCGC00408807-01	APY0201	1-phosphatidylinositol 3-phosphate 5-kinase Inhibitor		-140.247	-147.401	-7.15418
NCGC00181342-03	Imidapril HCl			0.299519	-6.85391	-7.15343
NCGC00475734-01	Patidegib	Hedgehog Antagonist	Phase II	-36.7588	-43.9074	-7.14857
NCGC00091210-02	1,3-Dinitronaphthalene			11.3182	4.17917	-7.13898
NCGC00385789-01		<MOA Unknown> | Class: Diterpen | Genus: Kalmia | Family: Ericaceae | Species: latifolia		10.5283	3.39964	-7.1287
NCGC00385146-01		<MOA Unknown> | Class: N/A | Genus: N/A | Family: N/A | Species: N/A		-16.9174	-24.0406	-7.12319
NCGC00347822-02		<MOA Unknown> | Class: Iridoid | Genus: Veronica | Family: Scrophulariaceae | Species: anagallis-aquatica		-3.22472	-10.3279	-7.10315
NCGC00263118-02	Lirimilast	Phosphodiesterase IIII (PDE4) Inhibitor	Discontinued	14.031	6.92907	-7.10191
[truncated: 8,042 more rows]
